# Supplementary material for: Combining CD4 recovery and CD4: CD8 ratio restoration as an indicator for evaluating the outcome of continued antiretroviral therapy: an observational cohort study
Source: PubMed Central journal article supplement — BMJ Open. 2017 Sep 15;7(9):e016886. doi: 10.1136/bmjopen-2017-016886 (PMC5640103; doi:10.1136/bmjopen-2017-016886), 2017-09-15
Supplement: bmjopen-2017-016886.draft_revisions.pdf [file bmjopen-2017-016886.draft_revisions.pdf]

# BMJ Open

BMJ Open is committed to open peer review. As part of this commitment we make the peer review history of every article we publish publicly available.

When an article is published we post the peer reviewers' comments and the authors' responses online. We also post the versions of the paper that were used during peer review. These are the versions that the peer review comments apply to.

The versions of the paper that follow are the versions that were submitted during the peer review process. They are not the versions of record or the final published versions. They should not be cited or distributed as the published version of this manuscript.

BMJ Open is an open access journal and the full, final, typeset and author-corrected version of record of the manuscript is available on our site with no access controls, subscription charges or pay-per-view fees (<http://bmjopen.bmj.com>).

If you have any questions on BMJ Open's open peer review process please email [info.bmjopen@bmj.com](mailto:info.bmjopen@bmj.com)

# BMJ Open

## Combining CD4 recovery and CD4/CD8 ratio restoration in an indicator for evaluating the outcome of continued antiretroviral therapy: an observational cohort study

|                                 |                                                                                                                                                                                                                                                                                                                                                                                                                                                                                                                                                                                            |
|---------------------------------|--------------------------------------------------------------------------------------------------------------------------------------------------------------------------------------------------------------------------------------------------------------------------------------------------------------------------------------------------------------------------------------------------------------------------------------------------------------------------------------------------------------------------------------------------------------------------------------------|
| Journal:                        | <i>BMJ Open</i>                                                                                                                                                                                                                                                                                                                                                                                                                                                                                                                                                                            |
| Manuscript ID                   | bmjopen-2017-016886                                                                                                                                                                                                                                                                                                                                                                                                                                                                                                                                                                        |
| Article Type:                   | Research                                                                                                                                                                                                                                                                                                                                                                                                                                                                                                                                                                                   |
| Date Submitted by the Author:   | 16-Mar-2017                                                                                                                                                                                                                                                                                                                                                                                                                                                                                                                                                                                |
| Complete List of Authors:       | Lee, Shui Shan; The Chinese University of Hong Kong, Stanley Ho Centre for Emerging Infectious Diseases<br>Wong, Ngai Sze; The Chinese University of Hong Kong, Stanley Ho Centre for Emerging Infectious Diseases<br>Wong, Bonnie; Department of Health, Hong Kong Special Administrative Region Government, Special Preventive Programme<br>Wong, Ka Hing; Department of Health, Hong Kong Special Administrative Region Government, Special Preventive Programme<br>Chan, Kenny; Department of Health, Hong Kong Special Administrative Region Government, Special Preventive Programme |
| <b>Primary Subject Heading</b>: | HIV/AIDS                                                                                                                                                                                                                                                                                                                                                                                                                                                                                                                                                                                   |
| Secondary Subject Heading:      | Immunology (including allergy), Infectious diseases                                                                                                                                                                                                                                                                                                                                                                                                                                                                                                                                        |
| Keywords:                       | antiretroviral therapy, CD4, CD8, CD4/CD8 ratio, immune outcome                                                                                                                                                                                                                                                                                                                                                                                                                                                                                                                            |
|                                 |                                                                                                                                                                                                                                                                                                                                                                                                                                                                                                                                                                                            |

SCHOLARONE™  
Manuscripts

only

1  
2  
3 **Combining CD4 recovery and CD4/CD8 ratio restoration in an indicator for**  
4 **evaluating the outcome of continued antiretroviral therapy: an observational**  
5 **cohort study**  
6  
7  
8

9 **Running title:** Immune outcome following antiretroviral therapy  
10

11  
12  
13  
14 Shui Shan Lee<sup>1</sup>, Ngai Sze Wong<sup>1,2\*</sup>, Bonnie Chun Kwan Wong<sup>3</sup>, Ka Hing Wong<sup>3</sup>,  
15  
16 Kenny Chi Wai Chan<sup>3</sup>  
17  
18  
19

20  
21 <sup>1</sup>Stanley Ho Centre for Emerging Infectious Diseases, The Chinese University of  
22  
23 Hong Kong, Hong Kong, People's Republic of China;  
24

25 <sup>2</sup>Institute for Global Health & Infectious Diseases, University of North Carolina at  
26  
27 Chapel Hill, Chapel Hill, United States;  
28

29 <sup>3</sup>Special Preventive Programme, Centre for Health Protection, Department of Health,  
30  
31 Hong Kong Special Administrative Region Government, Hong Kong, People's  
32  
33 Republic of China;  
34  
35  
36  
37

38 **\*Corresponding author**

39  
40 Dr. Ngai Sze Wong

41  
42 Stanley Ho Centre for Infectious Diseases

43  
44 Postgraduate Education Centre

45  
46 Prince of Wales Hospital

47  
48 Shatin

49  
50 Hong Kong

51  
52 Tel: (852) 22528813

53  
54 Fax: (852) 26354977  
55  
56  
57  
58  
59  
60

1  
2  
3 Email: [candy\\_wong@cuhk.edu.hk](mailto:candy_wong@cuhk.edu.hk)  
4

5 **Keywords:** antiretroviral therapy; CD4; CD8; CD4/CD8 ratio; immune outcome  
6  
7

8  
9 **Word Count:**

10  
11 **Abstract:** 239 words; **Main text:** 3095 words  
12  
13

14  
15  
16  
17  
18  
19  
20  
21  
22  
23  
24  
25  
26  
27  
28  
29  
30  
31  
32  
33  
34  
35  
36  
37  
38  
39  
40  
41  
42  
43  
44  
45  
46  
47  
48  
49  
50  
51  
52  
53  
54  
55  
56  
57  
58  
59  
60

For peer review only

**ABSTRACT**

**Objectives.** Immune recovery following highly active antiretroviral therapy (HAART) is commonly assessed by the degree of CD4 reconstitution alone. In this study, we aimed to assess immune recovery by incorporating both CD4 count and CD4/CD8 ratio.

**Design:** Observational cohort study

**Setting and participants.** Clinical data from Chinese HIV+ patients attending the largest HIV service in Hong Kong and who had been on HAART for  $\geq 4$  years were accessed.

**Main outcome measures.** Optimal immune outcome was defined as a combination of a CD4 count  $\geq 500/\mu\text{L}$  and a CD4/CD8 ratio  $\geq 0.8$ .

**Results.** A total of 718 patients were included for analysis (6353 person-years). At the end of Year 4, 318 out of 715 patients achieved CD4  $\geq 500/\mu\text{L}$ , of which only 33% (105 out of 318) concurrently achieved CD4/CD8 ratio  $\geq 0.8$ . Patients with a pre-HAART CD8  $\leq 800/\mu\text{L}$  (428 out of 704) were more likely to be optimal immune outcome achievers with CD4  $\geq 500/\mu\text{L}$  and CD4/CD8 ratio  $\geq 0.8$ , the association of which was stronger after adjusting for pre-HAART CD4 counts. In a multivariable logistic model, optimal immune outcome was positively associated with male gender, younger pre-HAART age and higher pre-HAART CD4 count, longer duration of HAART and pre-HAART CD8  $\leq 800/\mu\text{L}$ . Treatment regimen and cumulative viral loads played no significant role in the pattern of immune recovery.

**Conclusions.** A combination of CD4 count and CD4/CD8 ratio could form an immune marker useful for the characterisation treatment outcome over time, compared to the reliance on CD4 alone.

**Strengths and limitations of this study**

- The combined use of both CD4 and CD4/CD8 ratio as an outcome measure for immune recovery could prevent overestimation of treatment performance by high CD4 count but low CD4/CD8 ratio.

- As only a small proportion of patients achieved CD4/CD8 ratio  $\geq 1$  by Year 4 after HAART initiation, we have therefore set the threshold ratio at 0.8 instead.

For peer review only

## INTRODUCTION

Highly active antiretroviral therapy (HAART) forms the cornerstone of modern day treatment of human immunodeficiency virus (HIV) infection. In monitoring treatment outcome, peripheral blood CD4+ lymphocyte (hereafter referred as CD4) count measurement is widely used, the results of which feature a rapid rise in the first 3-6 months followed by a second phase of gradual increase, plateauing 4 to 6 years afterwards.<sup>1</sup> Nadir CD4 counts and advanced age are associated with poorer CD4 recovery, a well-reported phenomenon that has been reviewed in the literature.<sup>1,2</sup> While high and persistently elevated CD8+ lymphocytes (hereafter referred as CD8) is commonly observed in chronically infected HIV patients, relatively little attention has been paid to its impact on immunological recovery.<sup>3</sup> A large cohort study suggested that markedly elevated CD8 count at HAART initiation was associated with a poor increase in CD4 count.<sup>4</sup> Host factors aside, virus burden exerted by HIV could also impact immunological recovery. In the absence of timely and effective HAART, HIV cumulate over time leading to a state of cumulative viraemia, a predictor of suboptimal immunological outcome in primary HIV infection.<sup>5</sup> Separate studies have shown that high cumulative viral load was a potential marker for progression to acquired immune deficiency syndrome (AIDS) in chronic HIV infection.<sup>6</sup> Despite effective therapy, some 20-30% of patients were unable to achieve optimal immunological recovery,<sup>1,7</sup> an outcome resulting from the interaction of a good range of host and viral factors, as well as co-infection with other pathogens, notably hepatitis C virus.<sup>3</sup>

Over the last decade, a CD4-guided approach to treatment initiation has gradually

1  
2  
3 been replaced by early initiation of HAART irrespective of baseline CD4 level.<sup>8</sup>  
4  
5 Achievement of a high CD4 count of, say, over 500/ $\mu$ L remains a commonly used  
6  
7 marker of immune restoration. Knowingly, prompt treatment and full viral  
8  
9 suppression do not imply freedom from co-morbidities, as HIV disease is also  
10  
11 characterised by a state of immune activation, with the emergence of non-AIDS  
12  
13 morbidity and mortality.<sup>9</sup> This morbid state of immune activation cannot be inferred  
14  
15 from the pattern of CD4 recovery alone. Failure of CD4/CD8 normalisation following  
16  
17 HAART has however been linked to this scenario of immune activation.<sup>10 11</sup> A high  
18  
19 CD8 count following HAART was shown to be associated with inflammatory  
20  
21 non-AIDS-related clinical events, and in fact a higher risk of myocardial infarction  
22  
23 has been reported.<sup>4 12</sup> Apparently, a target CD4 count is inadequate for reflecting  
24  
25 effective immune recovery. Concurrent rise of the CD4/CD8 ratio is increasingly  
26  
27 recognized as an important marker of immune reconstitution.<sup>10 13</sup>  
28  
29  
30  
31  
32  
33

34 To better monitor immunological recovery following HAART, new biomarkers are  
35  
36 needed, which should preferably be derived from routinely collected laboratory data.  
37  
38 Optimal outcome could be founded on CD4/CD8 normalization on top of the  
39  
40 regularly monitored CD4 count. In this study, we define HAART associated immune  
41  
42 recovery by a combination of CD4 outcome and CD4/CD8 restoration. We set out to  
43  
44 examine its predictors by analysing regularly collected viral load and immunological  
45  
46 data, the latter including CD8 count, in a cohort of HIV patients following HAART.  
47  
48  
49  
50  
51  
52  
53

## 54 METHODS

55  
56  
57  
58  
59  
60



1  
2  
3 Anonymous clinical data from Integrated Treatment Centre, the largest HIV clinical  
4 service in Hong Kong were accessed for this observational study. Data access  
5 approval was granted by Department of Health, Hong Kong Special Administrative  
6 Region Government in compliance with the Personal Data (Privacy) Ordinance.  
7  
8 Individual consent for the study was waived following approval of the Joint Chinese  
9 University of Hong Kong – New Territories East Cluster Clinical Research Ethics  
10 Committee (CREC). HIV patients of age  $\geq 18$  diagnosed in 1985-2012, on HAART  
11 continuously for  $\geq 4$  years without treatment interruption, with at least 1 CD4  
12 measurement during treatment and with viral load fully suppressed (without  
13 consecutive viral load  $> 500$  copies/mL in the first 4 years on treatment) were selected.  
14  
15 We included patients who were treatment naïve or have been on non-standard  
16 treatment for  $< 1$  year before HAART initiation. Data retrieved were: (a) CD4 and  
17 CD8 counts at diagnosis, before HAART initiation and 3-4 monthly subsequently, (b)  
18 viral load levels at the respective time-points, (c) AIDS diagnosis and the timing, as  
19 appropriate, (d) antiretroviral treatment date and regimens, differentiated as protease  
20 inhibitor (PI) or non-nucleoside reverse transcriptase inhibitor (NNRTI) based as  
21 other regimens were rarely used for treatment naïve patients  
22  
23  
24  
25  
26  
27  
28  
29  
30  
31  
32  
33  
34  
35  
36  
37  
38  
39  
40  
41  
42

43 Estimated cumulative viral load was expressed as years  $\times \log_{10}$  copies/mL, in  
44 accordance with the method reported by Zoufaly et al.<sup>14</sup> with modifications. Patients  
45 with available negative HIV testing result within 3 years before HIV diagnosis were  
46 included, so that one's seroconversion date could be estimated with confidence.<sup>15</sup> In  
47 brief, the products of the  $\log_{10}$  viral load were summed from estimated seroconversion  
48 to subsequent specified time-point(s), with the computation of the highest viral load  
49 for the undiagnosed interval and an upward adjustment by 1  $\log_{10}$  for the presumed  
50  
51  
52  
53  
54  
55  
56  
57  
58  
59  
60

1  
2  
3 primary infection period. The time of seroconversion was determined as the mid-point  
4  
5 between last negative and first positive HIV antibody testing dates. On the other hand,  
6  
7 optimal immune outcome was defined as the achievement of a CD4 count of  $\geq 500/\mu\text{L}$   
8  
9 and a CD4/CD8 ratio  $\geq 0.8$  while conventional outcome was defined as achieving CD4  
10  
11 count of  $\geq 500/\mu\text{L}$  but not CD4/CD8 ratio  $\geq 0.8$  within specific time. Late HIV  
12  
13 diagnosis was defined as the diagnosis of AIDS within 3 months of HIV diagnosis.  
14  
15 The latest CD4 and CD8 measurements  $\leq 30$  days before HAART initiation were used  
16  
17 as the baseline.  
18  
19

20  
21  
22 Comparisons between pre-HAART CD8  $> 800/\mu\text{L}$  vs  $\leq 800/\mu\text{L}$  were made by odds ratio  
23  
24 (OR) and multivariable logistic regression with pre-HAART CD4 as confounder,  
25  
26 while correlation coefficients were calculated to test the associations between CD4  
27  
28 and CD8 before and 4 years after HAART. The CD8 threshold was adopted by taking  
29  
30 reference from the criteria of high CD8 count (i.e. over  $800/\mu\text{L}$ ) during primary  
31  
32 infection reported in another study.<sup>16</sup> CD4 (maximum value), CD8 (minimum value)  
33  
34 and CD4/CD8 ratio (maximum value) of patients achieving optimal immune outcome  
35  
36 and conventional outcome by Year 4 on HAART over time ( $\leq 12$  months, 12.1-24  
37  
38 months, ... ,  $> 96$  months) were compared in generalized estimating equations (GEE).  
39  
40 Multivariable logistic regression model (stepwise) was applied to examine the  
41  
42 predictors of optimal immune outcome and conventional outcome. Complete case  
43  
44 analysis was performed. Loss to follow-up and death were data end points. Statistical  
45  
46 tests were performed in SPSS.  
47  
48  
49  
50  
51  
52  
53  
54  
55

## 56 RESULTS

57  
58  
59  
60

1  
2  
3  
4  
5 As of the end of 2012, data of 2974 diagnosed adults were accessed. Of these, 718  
6  
7 eligible treatment-naïve diagnosed cases who had been on HAART continuously for  
8  
9  $\geq 4$  years were included in the study. Their case records contained 18857 clinical  
10  
11 measurements (18693 CD4, 18521 CD8 and/or 17776 viral load measurements) at  
12  
13 multiple time points spanning over 6353 person-years' follow-up. General  
14  
15 characteristics of the study population are displayed in Table 1. Overall, a majority  
16  
17 (84%) were male with a median age at diagnosis of 37 years (interquartile range  
18  
19 (IQR): 31 – 45 years). The median interval from diagnosis to the latest assessment  
20  
21 was 100 months (IQR= 74-141 months). Most were infected by either HIV-1 subtype  
22  
23 B (31%) or CRF01\_AE (38%), with men who have sex with men (MSM) accounting  
24  
25 for 39% of the study population. The pre-HAART median CD4 and CD8 counts were  
26  
27 109/ $\mu$ L and 673/ $\mu$ L respectively, which were positively correlated (Pearson  
28  
29 correlation coefficient  $r = 0.50$ ,  $p < 0.001$ ) (See web-only Supplementary Figure 1(d)).  
30  
31 The life-time estimated cumulative viral load at the last assessment increased with the  
32  
33 interval between seroconversion and HAART initiation ( $r = 0.94$ ,  $p < 0.001$ ).  
34  
35  
36  
37  
38  
39

40  
41 During the study period, a CD4-guided approach was in place, implying that HAART  
42  
43 was recommended when one's CD4 count fell below 350/ $\mu$ L. A majority of the  
44  
45 patients (74%) had been started on a PI-based with 25% on NNRTI-based regimen,  
46  
47 and 1 % had been started on non-standard regimen subsequently changed to HAART  
48  
49 within 1 year. Integrase Inhibitors (INSTI) had not been used as a component of one's  
50  
51 first regimen, but 3 patients had changed to raltegravir-based regimen  
52  
53 afterwards. (Table 1). The median treatment duration was 85.38 months (IQR: 63.39 to  
54  
55 117.32). As of the end of a 4-year observation period, the CD4 count of 318 patients  
56  
57  
58  
59  
60

1  
2  
3 (44%) had reached 500/ $\mu$ L or above, of which 105 (33%) gave a CD4/CD8 ratio of  
4  
5  $\geq 0.8$  concurrently, while 205 (64%) patients reached the CD4 target but not the ratio.  
6  
7 On the other hand, 145 patients reached the optimal ratio, of which 32 (22%) patients  
8  
9 could not reach the CD4 target. (Table 3) The temporal changes of CD4 count, CD8  
10  
11 count and CD4/CD8 ratio over time is shown in figure 1. Whereas both CD4 count  
12  
13 (figure 1(a)) and CD4/CD8 ratio (figure 1(e)) showed a steady rise from the first  
14  
15 time-point following HAART, the temporal pattern of CD8 counts was inconspicuous  
16  
17 (figure 1(c)). Patients with optimal immune outcome had significantly higher median  
18  
19 CD4 and CD4/CD8 ratio but lower CD8 count than those only with satisfactory CD4  
20  
21 recovery (conventional outcome) in all time points (GEE model results in  
22  
23 Supplementary Table 1). The CD4 count at Year 4 was positively correlated with  
24  
25 pre-HAART CD4 ( $r=0.38$ ,  $p<0.001$ )(See web-only Supplementary Figure 1(a))  
26  
27 Categorised by one's pre-HAART CD8 count, about half ( $n=428$ , 61%) had a lower  
28  
29 count of  $\leq 800/\mu$ L. The 2 groups had similar demographic, cumulative viral load levels  
30  
31 and had received similar treatment regimens. The CD4 count at Year 4 was positively  
32  
33 correlated with pre-HAART CD8 count ( $r=0.18$ ,  $p<0.001$ ) (See web-only  
34  
35 Supplementary Figure 1(b)) whereas the latter was also positively correlated with  
36  
37 CD8 at Year 4. ( $r=0.35$ ,  $p<0.001$ ) (See web-only Supplementary Figure 1(c)). After  
38  
39 adjusting for pre-HAART CD4, patients with lower pre-HAART CD8 had higher  
40  
41 chance of achieving a higher CD4/CD8 ratio at Year 4 (adjusted OR (aOR)=64.63,  
42  
43 95% C.I.=23.47 to 177.98) (Table 2). Likewise, a low pre-HAART CD8 count of  
44  
45  $\leq 800/\mu$ L was associated with the optimal immune outcome at Year 4, with an  
46  
47 increased odds (aOR=5.07, 95% C.I.=2.74-9.41) after adjusting for pre-HAART CD4.  
48  
49 There was no significant correlation between Year 4 CD8 and pre-HAART CD4 (See  
50  
51 web-only Supplementary Figure 1(e)), but positive association between CD4 and CD8  
52  
53  
54  
55  
56  
57  
58  
59  
60

1  
2  
3 at Year 4 ( $r=0.33$ ,  $p<0.001$ ) could be demonstrated (See web-only Supplementary  
4  
5 Figure 1(f)).  
6  
7

8  
9  
10 The following independent variables were then tested for their prediction of optimal  
11 immune outcome and conventional outcome achieved since treatment initiation  
12 throughout the observation period: pre-HAART CD4, pre-HAART CD8, pre-HAART  
13 age, treatment duration and male gender. In the final model, both high pre-HAART  
14 CD4 and low pre-HAART CD8 were significant predictors of optimal immune  
15 outcome, while only the former was a significant predictor of conventional outcome  
16 (Table 4). Patients who were male and started HAART at younger age were more  
17 likely to achieve both outcomes. Patients on treatment for longer time ( $\geq 97$  months)  
18 had higher odds to achieve optimal immune outcome (aOR=3.34, 95% C.I.=2.17 to  
19 5.15, 49-72 months as reference) than conventional outcome (aOR=2.78,  
20 95% C.I.=1.89 to 4.09, 49-72 months as reference). As a substudy (results not shown),  
21 cumulative viral load was measured but it did not show any correlation with the  
22 pattern of immune response.  
23  
24  
25  
26  
27  
28  
29  
30  
31  
32  
33  
34  
35  
36  
37  
38  
39  
40  
41  
42

## 43 **DISCUSSION**

44  
45  
46  
47 Pre-HAART CD4 count has long been shown to be a predictor of immunological  
48 outcome 3-5 years following antiretroviral therapy.<sup>1</sup> Our previous longitudinal studies  
49 in a cohort of Chinese HIV patients have demonstrated positive associations between  
50 nidus and maximum CD4 count over 5 years irrespective of the causative virus  
51 subtype or the regimens prescribed.<sup>17 18</sup> In assessing antiretroviral treatment response,  
52  
53  
54  
55  
56  
57  
58  
59  
60

1  
2  
3 however, CD4 count alone appeared to add little to viral load monitoring.<sup>19</sup> To  
4  
5 account for the potential risk of non-AIDS related comorbidities including metabolic  
6  
7 complications,<sup>9</sup> parallel CD4/CD8 ratio testing is gaining popularity as it reflects also  
8  
9 the intensity of chronic inflammation implicated.<sup>9 10</sup> In this study, a CD4 count  
10  
11  $\geq 500/\mu\text{L}$  in conjunction with a ratio of  $\geq 0.8$  was examined as a target outcome  
12  
13 indicator for chronically infected patients on continued antiretroviral therapy. This  
14  
15 target was achieved in 15% (105 out of 715) of our patients at the end of a 4-year  
16  
17 treatment period. Both pre-HAART CD4 and CD8 count, as well as the treatment  
18  
19 interval were independent predictors of this new outcome target. While CD4 remained  
20  
21 a useful prognostic marker, using it as the sole marker might overestimate treatment  
22  
23 performance by including patients with high CD4 count but high CD8 count and low  
24  
25 CD4/CD8 ratio as achiever (205 out of 715 achieved CD4 target only).  
26  
27  
28  
29  
30  
31

32 In this study, we have shown that 44% of patients on HAART achieved a CD4 count  
33  
34  $\geq 500/\mu\text{L}$  at the end of 4 years, an outcome slightly poorer than that of 59% reported  
35  
36 by the Swiss HIV Cohort Study, a discrepancy which could be attributed to our  
37  
38 shorter observation period (4 instead of 5 years) and the lower median pre-HAART  
39  
40 CD4 count ( $158/\mu\text{L}$  compared to  $180/\mu\text{L}$ ).<sup>20</sup> As concluded in the recently published  
41  
42 “START” study examining the benefits of the initiation of antiretroviral therapy in  
43  
44 HIV-positive adults with a CD4 count  $>500/\mu\text{L}$ , CD4 count *per se* could not capture  
45  
46 all outcome effects arising from immediate HAART in chronic HIV infection.<sup>21</sup> Our  
47  
48 study confirmed that CD4/CD8 ratio could be a readily available supplementary  
49  
50 marker to monitor immune recovery. Evidently, the ratio may vary with lengths of  
51  
52 observations, demographics, and/or even HAART regimens.<sup>22-24</sup> As the CD4/CD8  
53  
54 ratio tended to rise more slowly than CD4 recovery, we have chosen an interim ratio  
55  
56  
57  
58  
59  
60

1  
2  
3 of 0.8<sup>22</sup> to assess the state of immune recovery at 4 years after HAART initiation.  
4  
5 Normalisation to a ratio of 1 could in fact be demonstrated in 13% of patients within 7  
6  
7 years, the median observation interval of our cohort.  
8  
9

10  
11 Pre-HAART CD8 count and its normalisation following antiretroviral treatment is  
12 relatively under-investigated.<sup>25 26</sup> In our study, pre-HAART CD4 and pre-HAART  
13 CD8 counts were positively correlated. Over time, CD4 rise went in parallel with  
14 slowly falling CD8 until reaching an optimal CD4 level of  $\geq 500/\mu\text{L}$  with a  
15 near-normalised CD4/CD8 ratio  $\geq 0.8$  at Year 4. Pre-HAART CD8 was a significant  
16 predictor of optimal immune outcome but not conventional outcome. The median  
17 CD8 count of former group was lower than latter group of patients in all time points  
18 since HAART initiation. Significant expansion of CD8 is known to occur soon after  
19 infection and the phenomenon might persist throughout the course of HIV infection.  
20 Recent studies suggested that CD8 normalisation was associated with early initiation  
21 of HAART during acute infection.<sup>16</sup> HIV-specific CD8 has been proposed to play an  
22 important role in effecting functional cure of HIV infection.<sup>27</sup> Its relationship with the  
23 absolute count of CD8 before and after HAART has not been established. With the  
24 growing evidence of the role of CD4/CD8 ratio as a new biomarker for non-AIDS  
25 morbidity and chronic inflammation,<sup>9 10 28 29</sup> it is possible that HIV+ patients' clinical  
26 outcome could be better explained from both the ratio and CD4 count rather than from  
27 the latter alone. From a virological perspective, the estimated cumulative viral load  
28 can be viewed as a surrogate of prolonged non-suppression of virus load. It does not  
29 however independently predict CD4 or CD4/CD8 ratio outcomes. Apparently, its  
30 immunological impacts could be overtaken by a long interval of HAART, if the  
31 pre-HAART CD4 and CD8 status were optimal. Overall, our results lent support to  
32  
33  
34  
35  
36  
37  
38  
39  
40  
41  
42  
43  
44  
45  
46  
47  
48  
49  
50  
51  
52  
53  
54  
55  
56  
57  
58  
59  
60

1  
2  
3 early initiation of HAART in chronic HIV infection to avoid temporal accumulation  
4  
5 of virus, a conclusion similar to that for primary HIV infection.<sup>5</sup>  
6  
7

8  
9 We acknowledge that our study carries a number of limitations. Foremost, all patients  
10 had been on HAART during the time when a CD4-guided approach to treatment  
11 initiation was enforced. As the patients had been started on either a PI-based or  
12 NNRTI-based regimen, the possible impacts of newer generations of antiretroviral  
13 like INSTI could not be ascertained. The results should therefore be interpreted with  
14 caution, especially that strong association between INSTI-based regimen and  
15 CD4/CD8 normalisation has recently been reported.<sup>30</sup> These were selection bias  
16 which might have limited the extrapolation of results to the entire HIV population. In  
17 addition, our dataset did not include other inflammatory or infectious outcomes and  
18 therefore these could not be analysed in perspective. As the main comparative period  
19 was 4 years, the minimum treatment duration of study population, the immunological  
20 recovery achieved by patients in this study may not necessarily be reflecting the  
21 ultimate response to HAART. We have nevertheless evaluated the outcome  
22 (comprising both CD4 count and CD4/CD8 ratio) of all enrolled patients with a  
23 median duration of treatment of over 6 years in the final analysis. Theoretically,  
24 cohorts with patients observed throughout their lifetime would be invaluable to  
25 determine the health benefits of HAART. Analyses from such life-long cohorts should  
26 become a reality in the coming years or decades.  
27  
28  
29  
30  
31  
32  
33  
34  
35  
36  
37  
38  
39  
40  
41  
42  
43  
44  
45  
46  
47  
48  
49  
50  
51  
52  
53

## 54 CONCLUSIONS

55  
56  
57  
58  
59  
60



1  
2  
3 Conventionally, CD4 count has been commonly used as the main outcome marker  
4 following HAART. In light of the increasing incidence of co-morbidities associated  
5 with HIV related chronic inflammations, CD4 count per se appears to carry little  
6 prognostic value in predicting HAART-associated immune recovery. Our results  
7 suggested that a combination of CD4 count and CD4/CD8 ratio provides a better  
8 reflection of immune outcome, compared to the reliance on CD4 alone. In evaluating  
9 immune recovery following long-term HIV viral suppression, pre-HAART CD8 count  
10 could be as important as nadir CD4 count as the independent predictors of the  
11 ultimate immune outcome. As both CD4 and CD8 are often routinely collected in the  
12 course of HIV management, an assessment of the temporal trends of CD4, CD8 and  
13 CD4/CD8 ratio could conveniently predict the immunological outcome without the  
14 need for sophisticated immune markers. Virological impact, as inferred from the  
15 estimated cumulative viral load after infection, does not however add to the outcome  
16 reflected from viral load suppression. The monitoring of the host immunological  
17 responses remains the most important approach in assessing treatment outcome  
18 following HAART.  
19  
20  
21  
22  
23  
24  
25  
26  
27  
28  
29  
30  
31  
32  
33  
34  
35  
36  
37  
38  
39  
40  
41  
42  
43  
44

#### 45 **Acknowledgements**

46  
47 The authors thank all staff of the Integrated Treatment Centre for their contribution to  
48 the delivery of quality clinical care to patients whose data were accessed for use in the  
49 analyses described in the manuscript. Li Ka Shing Institute for Health Sciences at The  
50 Chinese University of Hong Kong is acknowledged for technical support in  
51 developing the analyses. NS was supported by Guangdong Provincial Centers for  
52  
53  
54  
55  
56  
57  
58  
59  
60

1  
2  
3 Skin Diseases and STI Control, the UNC-South China STD Research Training Center  
4  
5 (FIC1D43TW009532-01) and NIH Fogarty International Center.  
6  
7

### 8 9 **Contributors**

10  
11 SSL motivated and designed the study. KHW, BCKW, KCWC contributed the data  
12  
13 and their interpretation. NSW analysed the data. SSL wrote the article. All authors  
14  
15 contributed to interpretation of results and critically reviewed and edited the article.  
16  
17

### 18 19 **Funding**

20  
21 The study was supported by Health and Medical Research Fund (Project code:  
22  
23 CU-15-A15) of the Food and Health Bureau, Hong Kong Special Administrative  
24  
25 Region Government. The funder did not have any role in study design, analysis and  
26  
27 interpretation of data and drafting the manuscript.  
28  
29  
30  
31

### 32 33 **Competing interests**

34  
35 The authors declare that there is no conflict of interest.  
36  
37  
38  
39

### 40 41 **Ethics approval**

42  
43 Data access approval was granted by Department of Health, Hong Kong Special  
44  
45 Administrative Region Government in compliance with the Personal Data (Privacy)  
46  
47 Ordinance. Individual consent for the study was waived following approval of the  
48  
49 Joint Chinese University of Hong Kong – New Territories East Cluster Clinical  
50  
51 Research Ethics Committee (CREC).  
52  
53  
54  
55

### 56 57 **Data sharing statement**

1  
2  
3 No additional data are available  
4  
5  
6

7  
8 **Disclaimer**

9  
10 The opinions and assertions contained herein are private views of the authors and do  
11 not necessarily reflect those of the Centre for Health Protection, Hong Kong Special  
12 Administrative Region Government Department of Health, or the other affiliating  
13  
14  
15  
16 institutions.  
17  
18  
19  
20  
21  
22  
23  
24  
25  
26  
27  
28  
29  
30  
31  
32  
33  
34  
35  
36  
37  
38  
39  
40  
41  
42  
43  
44  
45  
46  
47  
48  
49  
50  
51  
52  
53  
54  
55  
56  
57  
58  
59  
60

## REFERENCES

1. Battegay M, Nüesch R, Hirschel B, et al. Immunological recovery and antiretroviral therapy in HIV-1 infection. *The Lancet Infectious Diseases* 2006;6:280-87. doi: 10.1016/S1473-3099(06)70463-7
2. Gazzola L, Tincati C, Bellistri GM, et al. The absence of CD4+ T cell count recovery despite receipt of virologically suppressive highly active antiretroviral therapy: clinical risk, immunological gaps, and therapeutic options. *Clinical infectious diseases : an official publication of the Infectious Diseases Society of America* 2009;48(3):328-37. doi: 10.1086/595851
3. Tsiara CG, Nikolopoulos GK, Dimou NL, et al. Effect of hepatitis C virus on immunological and virological responses in HIV-infected patients initiating highly active antiretroviral therapy: a meta-analysis. *J Viral Hepat* 2013;20(10):715-24. doi: 10.1111/jvh.12101
4. Helleberg M, Kronborg G, Ullum H, et al. Course and Clinical Significance of CD8+ T-Cell Counts in a Large Cohort of HIV-Infected Individuals. *J Infect Dis* 2015;211(11):1726-34. doi: 10.1093/infdis/jiu669
5. Seng R, Goujard C, Krastinova E, et al. Influence of lifelong cumulative HIV viremia on long-term recovery of CD4+ cell count and CD4+/CD8+ ratio among patients on combination antiretroviral therapy. *AIDS (London, England)* 2015;29:595-607. doi: 10.1097/QAD.0000000000000571
6. Marconi VC, Grandits G, Okulicz JF, et al. Cumulative viral load and virologic decay patterns after antiretroviral therapy in HIV-infected subjects influence CD4 recovery and AIDS. *PLoS One* 2011;6(5):e17956. doi: 10.1371/journal.pone.0017956
7. Gaardbo JC, Hartling HJ, Gerstoft J, et al. Incomplete immune recovery in HIV infection: mechanisms, relevance for clinical care, and possible solutions. *Clin Dev Immunol* 2012;2012:670957. doi: 10.1155/2012/670957
8. World Health Organization. WHO | Guideline on when to start antiretroviral therapy and on pre-exposure prophylaxis for HIV 2015 [updated 2015-10-09 06:58:51].
9. Saracino A, Bruno G, Scudeller L, et al. Chronic inflammation in a long-term cohort of HIV-infected patients according to the normalization of the CD4:CD8 ratio. *AIDS research and human retroviruses* 2014;30:1178-84. doi: 10.1089/aid.2014.0080
10. Mussini C, Lorenzini P, Cozzi-Lepri A, et al. CD4/CD8 ratio normalisation and non-AIDS-related events in individuals with HIV who achieve viral load suppression with antiretroviral therapy: an observational cohort study. *Lancet HIV* 2015;2(3):e98-106. doi: 10.1016/S2352-3018(15)00006-5
11. Lu W, Mehraj V, Vyboh K, et al. CD4:CD8 ratio as a frontier marker for clinical outcome, immune dysfunction and viral reservoir size in virologically suppressed HIV-positive patients. *J Int AIDS Soc* 2015;18:20052. doi: 10.7448/IAS.18.1.20052
12. Badejo OA, Chang CC, So-Armah KA, et al. CD8+ T-cells count in acute myocardial infarction in HIV disease in a predominantly male cohort. *Biomed Res Int* 2015;2015:246870. doi: 10.1155/2015/246870
13. Serrano-Villar S, Deeks SG. CD4/CD8 ratio: an emerging biomarker for HIV. *Lancet*

- 1  
2  
3 HIV 2015;2(3):e76-7. doi: 10.1016/S2352-3018(15)00018-1
- 4 14. Zoufaly A, Stellbrink H-J, Heiden MAd, et al. Cumulative HIV viremia during highly  
5 active antiretroviral therapy is a strong predictor of AIDS-related lymphoma.  
6 *The Journal of Infectious Diseases* 2009;200:79-87. doi: 10.1086/599313
- 7 15. Pantazis N, Porter K, Costagliola D, et al. Temporal trends in prognostic markers of  
8 HIV-1 virulence and transmissibility: an observational cohort study. *Lancet*  
9 *HIV* 2014;1(3):e119-26. doi: 10.1016/S2352-3018(14)00002-2
- 10 16. Cao W, Mehraj V, Trottier B, et al. Early Initiation Rather Than Prolonged Duration  
11 of Antiretroviral Therapy in HIV Infection Contributes to the Normalization of  
12 CD8 T-Cell Counts. *Clinical infectious diseases : an official publication of the*  
13 *Infectious Diseases Society of America* 2016;62(2):250-7. doi:  
14 10.1093/cid/civ809
- 15 17. Naftalin CM, Wong NS, Chan DP, et al. Three different patterns of CD4 recovery in  
16 a cohort of Chinese HIV patients following antiretroviral therapy - a five-year  
17 observational study. *International journal of STD & AIDS* 2015;26:803-09. doi:  
18 10.1177/0956462414553826
- 19 18. Wong NS, Reidpath DD, Wong KH, et al. A multilevel approach to assessing  
20 temporal change of CD4 recovery following HAART initiation in a cohort of  
21 Chinese HIV positive patients. *J Infect* 2015;70(6):676-8. doi:  
22 10.1016/j.jinf.2014.10.012
- 23 19. Ford N, Meintjes G, Pozniak A, et al. The future role of CD4 cell count for  
24 monitoring antiretroviral therapy. *Lancet Infect Dis* 2015;15(2):241-7. doi:  
25 10.1016/S1473-3099(14)70896-5
- 26 20. Kaufmann GR, Furrer H, Ledergerber B, et al. Characteristics, determinants, and  
27 clinical relevance of CD4 T cell recovery to <500 cells/microL in HIV type  
28 1-infected individuals receiving potent antiretroviral therapy. *Clinical*  
29 *infectious diseases : an official publication of the Infectious Diseases Society of*  
30 *America* 2005;41(3):361-72. doi: 10.1086/431484
- 31 21. INSIGHT START Study Group, Lundgren JD, Babiker AG, et al. Initiation of  
32 Antiretroviral Therapy in Early Asymptomatic HIV Infection. *N Engl J Med*  
33 2015;373(9):795-807. doi: 10.1056/NEJMoa1506816
- 34 22. Menozzi M, Zona S, Santoro A, et al. CD4/CD8 ratio is not predictive of  
35 multi-morbidity prevalence in HIV-infected patients but identify patients with  
36 higher CVD risk. *J Int AIDS Soc* 2014;17(4 Suppl 3):19709. doi:  
37 10.7448/IAS.17.4.19709
- 38 23. Leung V, Gillis J, Raboud J, et al. Predictors of CD4:CD8 ratio normalization and its  
39 effect on health outcomes in the era of combination antiretroviral therapy.  
40 *PLoS One* 2013;8(10):e77665. doi: 10.1371/journal.pone.0077665
- 41 24. Lichtenstein KA, Armon C, Nagabhushanam V, et al. A pilot study to assess  
42 inflammatory biomarker changes when raltegravir is added to a virologically  
43 suppressive HAART regimen in HIV-1-infected patients with limited  
44 immunological responses. *Antiviral Therapy* 2012;17:1301-09. doi:  
45 10.3851/IMP2350
- 46 25. Cao W, Mehraj V, Kaufmann DE, et al. Elevation and persistence of CD8 T-cells in  
47 HIV infection: the Achilles heel in the ART era. *J Int AIDS Soc* 2016;19(1):20697.  
48 doi: 10.7448/IAS.19.1.20697
- 49 26. Mudd JC, Lederman MM. CD8 T cell persistence in treated HIV infection. *Curr*  
50  
51  
52  
53  
54  
55  
56  
57  
58  
59  
60

- 1  
2  
3           *Opin HIV AIDS* 2014;9(5):500-5. doi: 10.1097/COH.0000000000000086  
4 27. Jones RB, Walker BD. HIV-specific CD8(+) T cells and HIV eradication. *J Clin Invest*  
5           2016;126(2):455-63. doi: 10.1172/JCI80566  
6 28. Serrano-Villar S, Perez-Elias MJ, Dronda F, et al. Increased risk of serious  
7           non-AIDS-related events in HIV-infected subjects on antiretroviral therapy  
8           associated with a low CD4/CD8 ratio. *PLoS One* 2014;9(1):e85798. doi:  
9           10.1371/journal.pone.0085798  
10 29. Sainz T, Serrano-Villar S, Diaz L, et al. The CD4/CD8 ratio as a marker T-cell  
11           activation, senescence and activation/exhaustion in treated HIV-infected  
12           children and young adults. *AIDS* 2013;27(9):1513-6. doi:  
13           10.1097/QAD.0b013e32835faa72  
14 30. De Salvador-Guillouet F, Sakarovitch C, Durant J, et al. Antiretroviral Regimens  
15           and CD4/CD8 Ratio Normalization in HIV-Infected Patients during the Initial  
16           Year of Treatment: A Cohort Study. *PLoS One* 2015;10(10):e0140519. doi:  
17           10.1371/journal.pone.0140519  
18  
19  
20  
21  
22  
23  
24  
25  
26  
27  
28  
29  
30  
31  
32  
33  
34  
35  
36  
37  
38  
39  
40  
41  
42  
43  
44  
45  
46  
47  
48  
49  
50  
51  
52  
53  
54  
55  
56  
57  
58  
59  
60

**Table 1. General characteristics of study population (n=718)**

|                                        | frequency     | %            |
|----------------------------------------|---------------|--------------|
|                                        | <u>median</u> | <u>(IQR)</u> |
| <b>(a) Demographics</b>                |               |              |
| Male gender                            | 605           | 84%          |
| Ethnicity                              |               |              |
| Chinese                                | 581           | 81%          |
| Asian (Asian other than Chinese)       | 87            | 12%          |
| White                                  | 47            | 7%           |
| African                                | 3             | 0.4%         |
| Age (yrs, at HIV diagnosis)            | <u>37</u>     | (31 to 45)   |
| <b>(b) HIV infection and diagnosis</b> |               |              |
| Mode of transmission                   |               |              |
| heterosexual                           | 394           | 55%          |
| man-to-man sex                         | 280           | 39%          |
| injection drug use                     | 34            | 5%           |
| contaminated blood transfusion         | 6             | 1%           |
| undetermined                           | 4             | 1%           |
| HIV-1 Subtype                          |               |              |
| CRF01_AE                               | 270           | 38%          |
| B                                      | 224           | 31%          |
| C                                      | 8             | 1%           |
| Others                                 | 31            | 4%           |
| unavailable                            | 185           | 26%          |
| AIDS diagnosis before treatment        | 239           | 33%          |
| Late HIV diagnosis*                    | 192           | 27%          |

|                                                                                                  | frequency     | %                 |
|--------------------------------------------------------------------------------------------------|---------------|-------------------|
|                                                                                                  | <u>median</u> | <u>(IQR)</u>      |
| estimated cumulative viral load <sup>#</sup> from seroconversion to diagnosis (n=199)            | <u>8</u>      | (3 to 18)         |
| <b>(c) Pre-HAART status</b>                                                                      |               |                   |
| Age (yrs)                                                                                        | <u>39</u>     | (33 to 46)        |
| Months from diagnosis to treatment initiation                                                    | <u>8.67</u>   | (2.75 to 33.13)   |
| CD4 count (cells/ $\mu$ L)                                                                       | <u>109</u>    | (29 to 190)       |
| CD4/CD8 ratio <sup>a</sup>                                                                       | <u>0.14</u>   | (0.06 to 0.23)    |
| CD8 count (cells/ $\mu$ L) <sup>a</sup>                                                          | <u>673</u>    | (441 to 966)      |
| Viral load (log <sub>10</sub> copies/mL) <sup>b</sup>                                            | <u>5.15</u>   | (4.62 to 5.58)    |
| Estimated cumulative viral load <sup>#</sup> from seroconversion to treatment initiation (n=199) | <u>18</u>     | (11 to 29)        |
| <b>(d) Antiretroviral treatment and clinical outcomes</b>                                        |               |                   |
| First HAART regimen                                                                              |               |                   |
| NNRTI-based                                                                                      | 182           | 25%               |
| PI-based                                                                                         | 131           | 18%               |
| PI-based with booster                                                                            | 397           | 55%               |
| non-standard                                                                                     | 8             | 1%                |
| Total treatment duration (months)                                                                | <u>85.38</u>  | (63.39 to 117.32) |
| AIDS Free during treatment (n=479)                                                               | 456           | 95%               |
| Highest CD4 count within 4 years <sup>c</sup>                                                    | <u>476</u>    | (354 to 630)      |
| Highest CD4/CD8 ratio within 4 years <sup>d</sup>                                                | <u>0.55</u>   | (0.39 to 0.76)    |



|                                                              | <b>frequency</b>     | <b>%</b>     |
|--------------------------------------------------------------|----------------------|--------------|
|                                                              | <b><u>median</u></b> | <b>(IQR)</b> |
| CD4 count $\geq 500/\mu\text{L}$ within 4 years <sup>c</sup> | 318                  | 44%          |
| CD4/CD8 ratio $\geq 0.8$ within 4 years <sup>e</sup>         | 145                  | 20%          |
| Deceased                                                     | 39                   | 5%           |

\*Late HIV diagnosis refers to the diagnosis of AIDS within 3 months of HIV

diagnosis

# Estimated cumulative viral load expressed as years\*log<sub>10</sub> viral load copies/mL

<sup>a</sup> 14 missing values; <sup>b</sup> 18 missing values; <sup>c</sup> 2 missing values; <sup>d</sup> 8 missing values; <sup>e</sup> 3

missing values

**Table 2: Comparison between patients with high (>800/ $\mu$ L) and low ( $\leq$ 800/ $\mu$ L) pre-HAART CD8 counts**

Variables included in the analyses were (a) general baseline characteristics, (b) pre-HAART virological status, (c) antiretroviral therapy, and (d) outcome at year 4.

|                                     | pre-HAART<br>CD8 >800<br>(n=276) |       | pre-HAART<br>CD8 $\leq$ 800<br>(n=428) |       | Univariate<br>analysis | adjusted by<br>pre-HAART CD4 |            |               |
|-------------------------------------|----------------------------------|-------|----------------------------------------|-------|------------------------|------------------------------|------------|---------------|
|                                     | median/IQR/<br><u>no.</u>        | %     | median/IQR/<br><u>no.</u>              | %     | OR                     | 95% CI                       | aOR        | 95% CI        |
| <b>(a) Baseline characteristics</b> |                                  |       |                                        |       |                        |                              |            |               |
| Male gender                         | 242                              | 87.7% | 352                                    | 82.2% | 0.65                   | 0.42 to 1.01                 | 1.82       | 1.12 to 2.96* |
| Chinese ethnicity                   | 222                              | 80.4% | 351                                    | 82.0% | 1.11                   | 0.75 to 1.63                 | 1.10       | 0.71 to 1.71  |
| Mode of transmission                | (n=372)                          |       | (n=427)                                |       |                        |                              |            |               |
| MSM                                 | 120                              | 44.0% | 153                                    | 35.8% | <i>ref</i>             |                              | <i>ref</i> |               |
| Heterosexual                        | 140                              | 51.3% | 249                                    | 58.3% | 1.39                   | 1.02 to 1.91*                | 0.93       | 0.65 to 1.33  |
| injection drug user                 | 13                               | 4.8%  | 19                                     | 4.4%  | 1.15                   | 0.54 to 2.41                 | 0.47       | 0.21 to 1.08  |
| contaminated blood transfusion      | 0                                | 0.0%  | 6                                      | 1.4%  | /                      |                              | /          |               |
| Subtype                             | (n=206)                          |       | (n=322)                                |       |                        |                              |            |               |
| CRF01_AE                            | 95                               | 46.1% | 171                                    | 53.1% | <i>ref</i>             |                              | <i>ref</i> |               |
| B                                   | 94                               | 45.6% | 129                                    | 40.1% | 0.76                   | 0.53 to 1.1                  | 1.35       | 0.88 to       |

|                                             | pre-HAART<br>CD8 >800<br>(n=276) | pre-HAART<br>CD8 ≤800<br>(n=428) | Univariate<br>analysis    | adjusted by<br>pre-HAART CD4 |       |            |       |             |
|---------------------------------------------|----------------------------------|----------------------------------|---------------------------|------------------------------|-------|------------|-------|-------------|
|                                             | median/IQR/<br><u>no.</u>        | %<br><u>no.</u>                  | median/IQR/<br><u>no.</u> | %                            | OR    | 95% CI     | aOR   | 95% CI      |
|                                             |                                  |                                  |                           |                              |       |            |       | 2.06        |
| C                                           | 4                                | 1.9%                             | 4                         | 1.2%                         | 0.56  | 0.14 to    | 1.13  | 0.25 to     |
|                                             |                                  |                                  |                           |                              |       | 2.27       |       | 5.07        |
| Others                                      | 13                               | 6.3%                             | 18                        | 5.6%                         | 0.77  | 0.36 to    | 1.37  | 0.6 to 3.17 |
|                                             |                                  |                                  |                           |                              |       | 1.64       |       |             |
| Age at diagnosis<br>(yrs)                   | 36.80                            | 31.74 to                         | 37.46                     | 30.27 to                     | 1.00  | 0.98 to    | 0.99  | 0.98 to     |
|                                             |                                  | 43.54                            |                           | 45.17                        |       | 1.01       |       | 1.01        |
| Late HIV diagnosis                          | 48                               | 17.4%                            | 138                       | 32.2%                        | 2.26  | 1.56 to    | 0.98  | 0.64 to     |
|                                             |                                  |                                  |                           |                              |       | 3.28*      |       | 1.51        |
| AIDS before<br>treatment                    | 66                               | 23.9%                            | 168                       | 39.3%                        | 2.06  | 1.47 to    | 0.94  | 0.63 to     |
|                                             |                                  |                                  |                           |                              |       | 2.88*      |       | 1.41        |
| <b>(b) Pre-HAART virological status</b>     |                                  |                                  |                           |                              |       |            |       |             |
| viral load (log <sub>10</sub><br>copies/mL) | (n=274)                          |                                  | (n=420)                   |                              |       |            |       |             |
|                                             | 5.04                             | 4.55 to                          | 5.20                      | 4.69 to                      | 1.23  | 1.03-1.47* | 0.80  | 0.64-0.99*  |
|                                             |                                  | 5.52                             |                           | 5.58                         |       |            |       |             |
| Viral load log <sub>10</sub> > 145          | 52.9%                            |                                  | 259                       | 61.7%                        | 1.43  | 1.05 to    | 0.71  | 0.49 to     |
| 5                                           |                                  |                                  |                           |                              |       | 1.95*      |       | 1.02        |
| Estimated<br>cumulative viral<br>load #     | (n=96)                           |                                  | (n=101)                   |                              |       |            |       |             |
|                                             | 17.74                            | 10.00 to                         | 18.53                     | 10.88 to                     | 1.004 | 0.98 to    | 1.004 | 0.98 to     |

|                                                 | pre-HAART<br>CD8 >800<br>(n=276) | pre-HAART<br>CD8 ≤800<br>(n=428) | Univariate<br>analysis | adjusted by<br>pre-HAART CD4 |       |                  |  |  |
|-------------------------------------------------|----------------------------------|----------------------------------|------------------------|------------------------------|-------|------------------|--|--|
|                                                 | median/IQR/<br><u>no.</u>        | median/IQR/<br><u>no.</u>        | OR                     | 95% CI                       | aOR   | 95% CI           |  |  |
|                                                 | 29.61                            | 27.73                            | 1.03                   |                              | 1.03  |                  |  |  |
| <b>(c) Antiretroviral treatment</b>             |                                  |                                  |                        |                              |       |                  |  |  |
| Months from<br>diagnosis to<br>HAART initiation | 12.80<br>3.87 to 5.60            | 35.52<br>2.44 to 5.60            | 1.00                   | 0.99 to 1                    | 1.01  | 1 to 1.01*       |  |  |
| NNRTI-based<br>initial regimen                  | 70<br>25.4%                      | 105<br>24.5%                     | 0.96                   | 0.67 to 1.36                 | 1.84  | 1.22 to 2.78*    |  |  |
| <b>(d) Outcome at Year 4</b>                    |                                  |                                  |                        |                              |       |                  |  |  |
| CD4 count /μL                                   | (n=246)                          | (n=370)                          |                        |                              |       |                  |  |  |
|                                                 | 488<br>386 to 625                | 437<br>332 to 589                | 0.999                  | 0.998 to 1                   | 1.001 | 0.9997 to 1.002  |  |  |
| CD4>500/μL                                      | 117<br>47.6%                     | 141<br>38.1%                     | 0.68                   | 0.49 to 0.94*                | 1.29  | 0.88 to 1.91     |  |  |
| CD4/CD8 ratio                                   | (n=246)                          | (n=370)                          |                        |                              |       |                  |  |  |
|                                                 | 0.49<br>0.36 to 0.68             | 0.57<br>0.41 to 0.79             | 3.61                   | 1.93 to 6.75*                | 64.63 | 23.47 to 177.98* |  |  |
| Viral load (log <sub>10</sub><br>copies/mL)     | (n=245)                          | (n=366)                          |                        |                              |       |                  |  |  |
|                                                 | 1.88<br>1.88 to 2.6              | 1.88<br>1.88 to 2.6              | 1.18                   | 0.73 to 1.91                 | 0.83  | 0.48 to 1.44     |  |  |
| Suppressed viral                                | 245<br>100.0%                    | 364<br>99.5%                     | /                      | /                            | /     | /                |  |  |

|                                   | pre-HAART<br>CD8 >800<br>(n=276) | pre-HAART<br>CD8 ≤800<br>(n=428) | Univariate<br>analysis | adjusted by<br>pre-HAART CD4 |
|-----------------------------------|----------------------------------|----------------------------------|------------------------|------------------------------|
|                                   | median/IQR/<br><u>no.</u> %      | median/IQR/<br><u>no.</u> %      | OR                     | 95% CI                       |
|                                   |                                  |                                  | aOR                    | 95% CI                       |
| load (≤500<br>copies/mL)          |                                  |                                  |                        |                              |
| CD4>500/μL &<br>CD4/CD8 ratio>0.8 | (n=243)                          | (n=370)                          |                        |                              |
|                                   | 24 9.9%                          | 59 15.9%                         | 1.73                   | 1.04 to 5.07                 |
|                                   |                                  |                                  | 2.87*                  | 2.74 to 9.41*                |
| Treatment (months)                | 83.83 62.13 to 117.42            | 85.05 64.17 to 116.75            | 1.000                  | 0.997 to 0.999               |
|                                   |                                  |                                  | 1.004                  | 1.003                        |

Note: all analyses were performed in logistic regression: simple logistic regression for univariate analyses, and multivariable logistic regression with selected confounders for multivariable analyses.

# Estimated cumulative viral load from seroconversion expressed as years\*log<sub>10</sub> viral load copies/mL

\*p<0.05

<sup>a</sup> 1 missing value; <sup>b</sup> 2 missing value

**Table 3 The profiles of immunological outcomes of patients by achievement of none, one or both of the 2 target immunological markers (CD4  $\geq$ 500, CD4/CD8 ratio  $\geq$ 0.8) before the end of a 4-year observation period#**

|                                                | no. | median peak or highest CD4 count (/μL) (IQR) | median months to CD4 target (IQR) | median peak or highest CD4:CD8 ratio (IQR) | median months to target CD4:CD8 ratio (IQR) |
|------------------------------------------------|-----|----------------------------------------------|-----------------------------------|--------------------------------------------|---------------------------------------------|
| CD4 $\geq$ 500/μL and CD4:CD8 ratio $\geq$ 0.8 | 105 | 741 (618 to 876)                             | 20.63 (12.6 to 30.53)             | 0.98 (0.86 to 1.2)                         | 28.90 (14.43 to 42.95)                      |
| Concurrent achievement of both targets         | 15  | 694 (569 to 1182)                            | 20.27 (13.07 to 28.17)            | 1.05 (0.9 to 1.49)                         | 20.27 (13.07 to 28.17)                      |
| CD4 target before ratio target                 | 57  | 788 (660 to 921)                             | 15.13 (8.7 to 22.88)              | 0.89 (0.83 to 0.99)                        | 39.23 (30.78 to 45.98)                      |
| Ratio target before CD4 target                 | 33  | 650 (547 to 764)                             | 31.13 (22.3 to 39.4)              | 1.17 (1.02 to 1.56)                        | 14.40 (8.68 to 24.08)                       |
| CD4 $\geq$ 500/μL only                         | 205 | 622 (552 to 723)                             | 29.10 (17.43 to 38.37)            | 0.59 (0.49 to 0.69)                        | /                                           |
| Ratio $\geq$ 0.8 only                          | 32  | 431 (369 to 475)                             | /                                 | 1.05 (0.89 to 1.17)                        | 29.32 (18.48 to 40.33)                      |
| CD4 target then changed to ratio target        | 4   | 588 (519 to 660)                             | 20.02 (12.23 to 35.36)            | 0.86 (0.81 to 0.95)                        | 36.83 (20.68 to 49.72)                      |
| Ratio target then changed to CD4 target        | 4   | 583 (521 to 636)                             | 29.68 (20.52 to 40.38)            | 0.87 (0.86 to 1.01)                        | 13.87 (5.48 to 25.45)                       |
| Failure to achieve both targets                | 365 | 362 (253 to 432)                             | /                                 | 0.43 (0.31 to 0.55)                        | /                                           |

#Equivalent to a maximum of <52 months with the inclusion of a 3-month buffer period;

**Table 4. Multivariable logistic regression for evaluating variables associated with a) an optimal immunological outcome and b) conventional outcome**

An optimal immunological outcome was defined as achieved CD4 count  $\geq 500/\mu\text{L}$  and a CD4/CD8 ratio  $\geq 0.8$ , and conventional outcome was defined as only achieved CD4 count  $\geq 500/\mu\text{L}$  by study end-point

|                                      | a) optimal immune outcome |                 | b) conventional outcome |               |
|--------------------------------------|---------------------------|-----------------|-------------------------|---------------|
|                                      | aOR                       | 95% C.I.        | aOR                     | 95% C.I.      |
| Male gender                          | 2.23                      | 1.4 to 3.53*    | 1.81                    | 1.11 to 2.96* |
| Age at HAART initiation              | 0.98                      | 0.97 to 0.9996* | 0.96                    | 0.94 to 0.97* |
| Pre-HAART CD4 ( $\mu\text{L}$ )      |                           |                 |                         |               |
| <=100                                | <i>ref</i>                |                 | <i>ref</i>              |               |
| 101-200                              | 2.91                      | 1.83 to 4.62*   | 2.30                    | 1.57 to 3.37* |
| 201-300                              | 4.61                      | 2.53 to 8.39*   | 3.52                    | 2.1 to 5.9*   |
| >300                                 | 20.36                     | 7.51 to 55.17*  | 12.84                   | 3.6 to 45.75* |
| Months on treatment                  |                           |                 |                         |               |
| 49-72                                | <i>ref</i>                |                 | <i>ref</i>              |               |
| 73-96                                | 1.58                      | 0.93 to 2.67    | 1.67                    | 1.08 to 2.57* |
| $\geq 97$                            | 3.34                      | 2.17 to 5.15*   | 2.78                    | 1.89 to 4.09* |
| Pre-HAART CD8 $\leq 800/\mu\text{L}$ | 0.998                     | 0.998 to 0.999* |                         |               |
| Constant                             | 0.48                      |                 | 3.30                    |               |

aOR – adjusted odds ratio;

\* $p < 0.05$

## FIGURE LEGENDS

**Figure 1.** Yearly changes of (a) CD4 count, (b) CD8 count, and (c) CD4/CD8 ratio from HAART initiation to 6 years afterwards.

## Supplementary material

**Supplementary Figure 1.** Correlations between immunological markers of the study population in scattered plots with fitting line and 95% confidence interval (dotted lines): (a) pre-HAART CD8 versus pre-HAART CD4; (b) CD4 at year 4 versus pre-HAART CD4; (c) CD8 at year 4 versus pre-HAART CD4; (d) CD8 at year 4 versus CD4 at year 4; (e) CD8 at year 4 versus pre-HAART CD8; (f) CD4 at year 4 versus pre-HAART CD8.

**Supplementary Table 1.** Comparison of CD4 count, CD8 count and CD4/CD8 ratio between patients achieved optimal immune outcome and conventional outcome by Year 4 in generalized estimating equations



1  
2  
3  
4  
5  
6  
7  
8  
9  
10  
11  
12  
13  
14  
15  
16  
17  
18  
19  
20  
21  
22  
23  
24  
25  
26  
27  
28  
29  
30  
31  
32  
33  
34  
35  
36  
37  
38  
39  
40  
41  
42  
43  
44  
45  
46  
47  
48  
49  
50  
51  
52  
53  
54  
55  
56  
57  
58  
59  
60

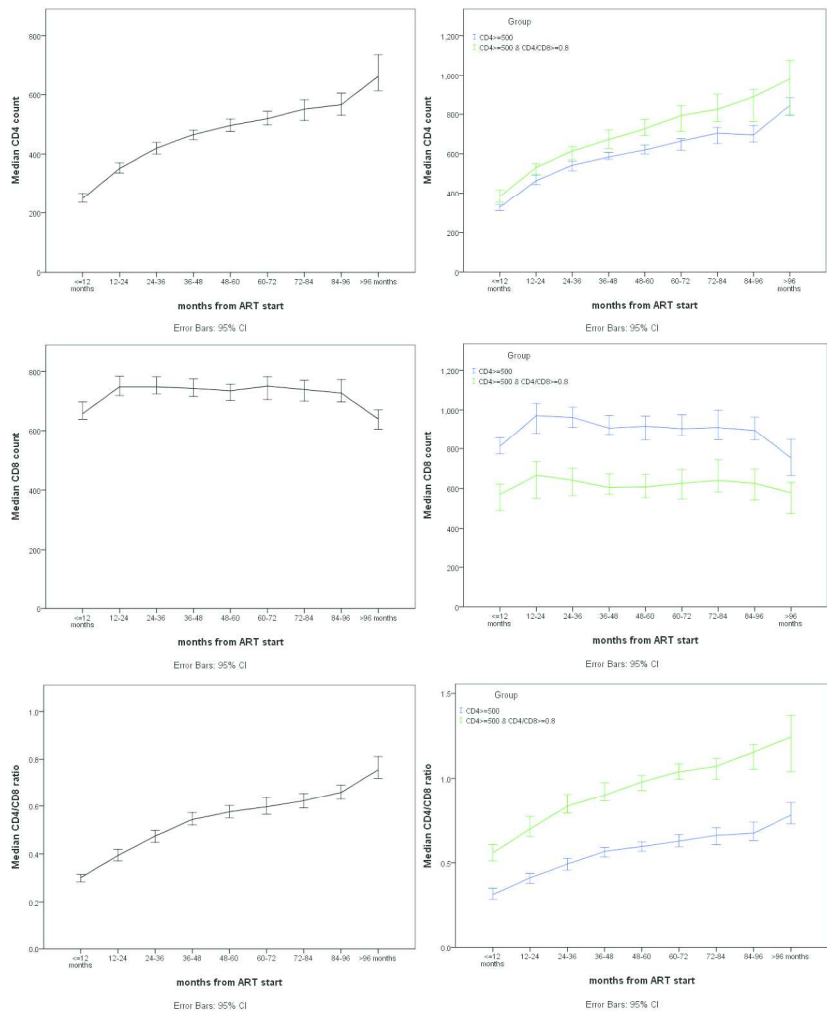

Yearly changes of (a) CD4 count, (b) CD8 count, and (c) CD4/CD8 ratio from HAART initiation to 6 years afterwards

275x397mm (300 x 300 DPI)

1  
2  
3  
4  
5  
6  
7  
8  
9  
10  
11  
12  
13  
14  
15  
16  
17  
18  
19  
20  
21  
22  
23  
24  
25  
26  
27  
28  
29  
30  
31  
32  
33  
34  
35  
36  
37  
38  
39  
40  
41  
42  
43  
44  
45  
46  
47  
48  
49  
50  
51  
52  
53  
54  
55  
56  
57  
58  
59  
60

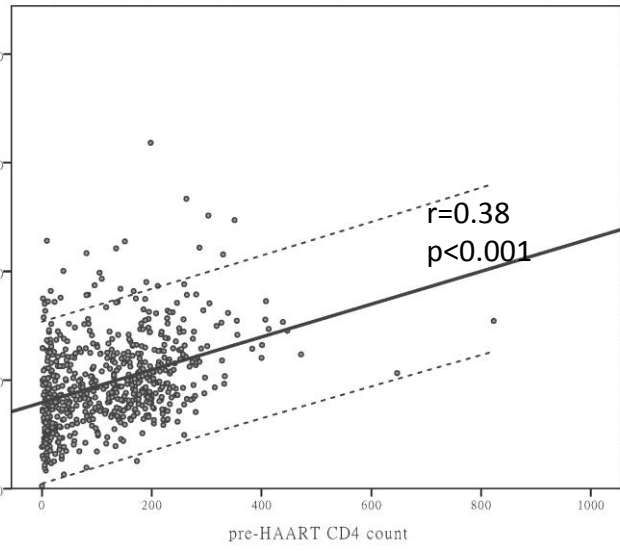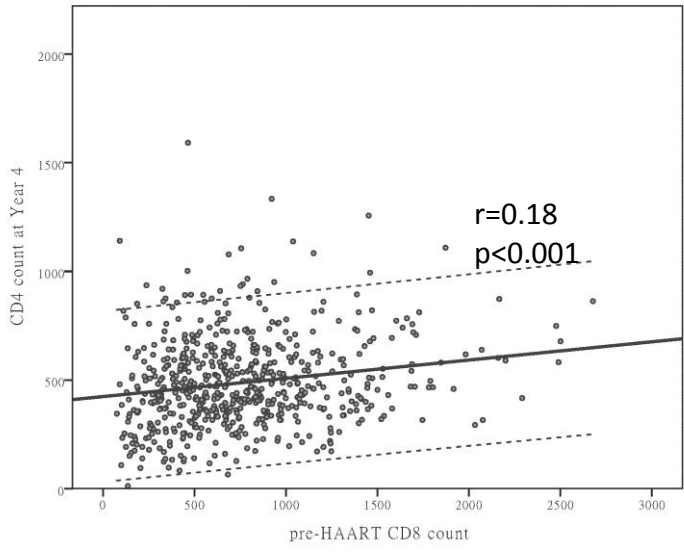

(c) pre-HAART CD8 (cells/ $\mu$ L) vs year 4 CD8 (cells/ $\mu$ L)

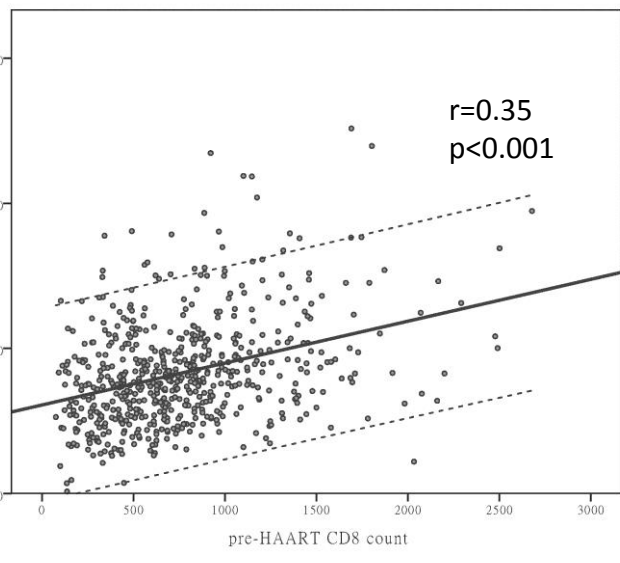

(d) pre-HAART CD8 (cells/ $\mu$ L) vs pre-HAART CD4 (cells/ $\mu$ L)

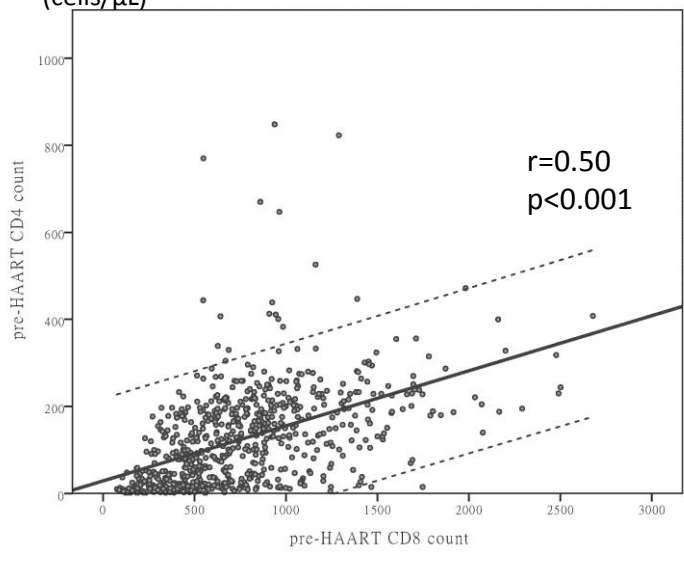

(e) pre-HAART CD4 (cells/ $\mu$ L) vs year 4 CD8 (cells/ $\mu$ L)

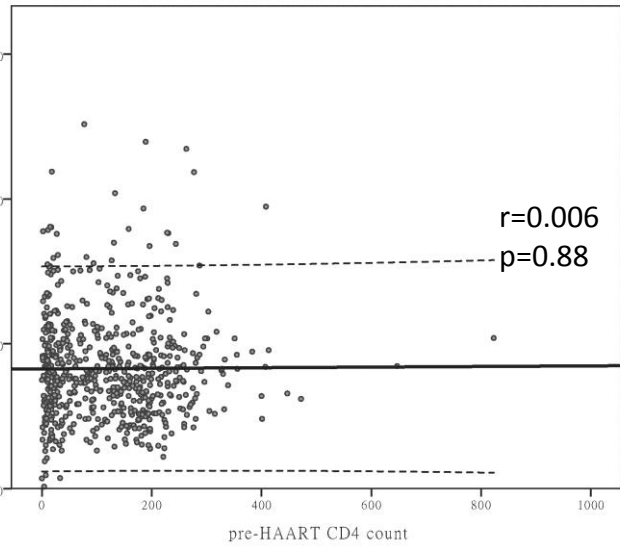

(f) year 4 CD8 (cells/ $\mu$ L) vs year 4 CD4 (cells/ $\mu$ L)

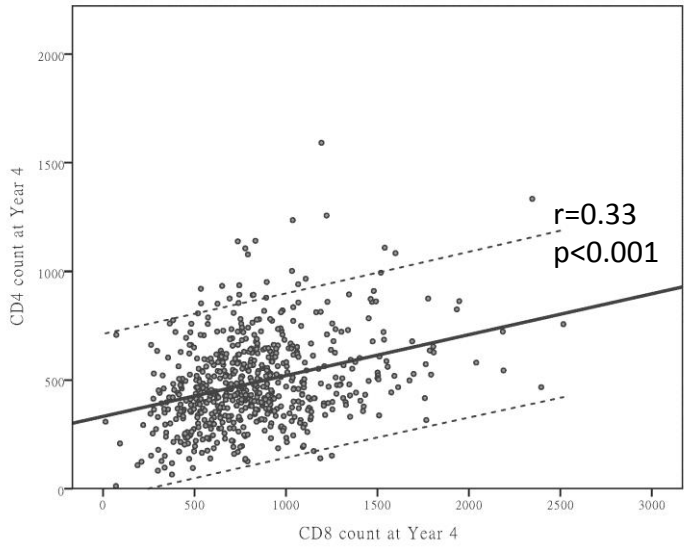

**Supplementary Table 1. Comparison of CD4 count, CD8 count and CD4/CD8 ratio between patients achieved optimal immune outcome and conventional outcome by Year 4 in generalized estimating equations**

| Model:                              | a. CD4 (cells/ $\mu$ L) |                   | b. CD8 (cells/ $\mu$ L) |                   | c. CD4/CD8 ratio |               |
|-------------------------------------|-------------------------|-------------------|-------------------------|-------------------|------------------|---------------|
|                                     | B                       | 95% C.I.          | B                       | 95% C.I.          | B                | 95% C.I.      |
| (Intercept)                         | 282.86                  | 273.99 to         | 1142.76                 | 1105.97 to        | 0.24             | 0.22 to 0.25* |
|                                     |                         | 291.74*           |                         | 1179.55*          |                  |               |
| <b>Months from HAART initiation</b> |                         |                   |                         |                   |                  |               |
| >96 months                          | 421.75                  | 400.9 to 442.59*  | -54.91                  | -95.36 to -14.47* | 0.49             | 0.46 to 0.52* |
| 84-96                               | 388.40                  | 366.41 to 410.39* | -18.28                  | -61.83 to 25.27   | 0.44             | 0.41 to 0.47* |
| 72-84                               | 375.13                  | 358.62 to 391.64* | -18.79                  | -58.14 to 20.57   | 0.41             | 0.39 to 0.43* |
| 60-72                               | 328.63                  | 314.74 to 342.52* | -50.54                  | -85.11 to -15.98* | 0.37             | 0.35 to 0.39* |
| 48-60                               | 297.14                  | 283.97 to 310.3*  | -19.01                  | -48.33 to 10.3    | 0.34             | 0.31 to 0.37* |
| 36-48                               | 267.56                  | 256.63 to 278.49* | -14.72                  | -42.71 to 13.28   | 0.28             | 0.26 to 0.3*  |
| 24-36                               | 207.20                  | 196.89 to 217.52* | 19.10                   | -7.03 to 45.24    | 0.20             | 0.19 to 0.22* |
| 12-24                               | 119.10                  | 111.79 to 126.42* | 61.80                   | 37.11 to 86.48*   | 0.10             | 0.08 to 0.12* |
| $\leq 12$ months                    | 0 <sup>a</sup>          |                   | 0 <sup>a</sup>          |                   | 0 <sup>a</sup>   |               |
| <b>Achievement by year 4</b>        |                         |                   |                         |                   |                  |               |
| optimal                             | 97.55                   | 80.71 to 114.39*  | -401.33                 | -437.93 to        | 0.41             | 0.37 to 0.45* |
| immune                              |                         |                   |                         | -364.74*          |                  |               |

1  
2  
3  
4 outcome

5  
6  
7 conventional 0<sup>a</sup> 0<sup>a</sup> 0<sup>a</sup>

8  
9  
10 outcome

11  
12  
13 **(Scale)** 31443 151917 0.06

14  
15 \*p<0.05

16 optimal immune outcome – achievement of CD4≥500/μL and CD4/CD8 ratio ≥0.8 by  
17 Year 4;

18 conventional outcome – achievement of only CD4≥500/μL by Year 4;

STROBE 2007 (v4) Statement—Checklist of items that should be included in reports of cohort studies

| Section/Topic             | Item # | Recommendation                                                                                                                                                                       | Reported on page # |
|---------------------------|--------|--------------------------------------------------------------------------------------------------------------------------------------------------------------------------------------|--------------------|
| Title and abstract        | 1      | (a) Indicate the study’s design with a commonly used term in the title or the abstract                                                                                               | 1                  |
|                           |        | (b) Provide in the abstract an informative and balanced summary of what was done and what was found                                                                                  | 3                  |
| <b>Introduction</b>       |        |                                                                                                                                                                                      |                    |
| Background/rationale      | 2      | Explain the scientific background and rationale for the investigation being reported                                                                                                 | 5-6                |
| Objectives                | 3      | State specific objectives, including any prespecified hypotheses                                                                                                                     | 6                  |
| <b>Methods</b>            |        |                                                                                                                                                                                      |                    |
| Study design              | 4      | Present key elements of study design early in the paper                                                                                                                              | 6                  |
| Setting                   | 5      | Describe the setting, locations, and relevant dates, including periods of recruitment, exposure, follow-up, and data collection                                                      | 7                  |
| Participants              | 6      | (a) Give the eligibility criteria, and the sources and methods of selection of participants. Describe methods of follow-up                                                           | 7                  |
|                           |        | (b) For matched studies, give matching criteria and number of exposed and unexposed                                                                                                  | NA                 |
| Variables                 | 7      | Clearly define all outcomes, exposures, predictors, potential confounders, and effect modifiers. Give diagnostic criteria, if applicable                                             | 7-8                |
| Data sources/ measurement | 8*     | For each variable of interest, give sources of data and details of methods of assessment (measurement). Describe comparability of assessment methods if there is more than one group | 7                  |
| Bias                      | 9      | Describe any efforts to address potential sources of bias                                                                                                                            | 14-15              |
| Study size                | 10     | Explain how the study size was arrived at                                                                                                                                            | NA                 |
| Quantitative variables    | 11     | Explain how quantitative variables were handled in the analyses. If applicable, describe which groupings were chosen and why                                                         | 8                  |
| Statistical methods       | 12     | (a) Describe all statistical methods, including those used to control for confounding                                                                                                | 7-8                |
|                           |        | (b) Describe any methods used to examine subgroups and interactions                                                                                                                  | NA                 |
|                           |        | (c) Explain how missing data were addressed                                                                                                                                          | 8                  |
|                           |        | (d) If applicable, explain how loss to follow-up was addressed                                                                                                                       | NA                 |
|                           |        | (e) Describe any sensitivity analyses                                                                                                                                                | NA                 |
| <b>Results</b>            |        |                                                                                                                                                                                      |                    |

1  
2  
3  
4  
5  
6  
7  
8  
9  
10  
11  
12  
13  
14  
15  
16  
17  
18  
19  
20  
21  
22  
23  
24  
25  
26  
27  
28  
29  
30  
31  
32  
33  
34  
35  
36  
37  
38  
39  
40  
41  
42  
43  
44  
45  
46  
47  
48  
49

|                          |     |                                                                                                                                                                                                              |           |
|--------------------------|-----|--------------------------------------------------------------------------------------------------------------------------------------------------------------------------------------------------------------|-----------|
| Participants             | 13* | (a) Report numbers of individuals at each stage of study—eg numbers potentially eligible, examined for eligibility, confirmed eligible, included in the study, completing follow-up, and analysed            | 8         |
|                          |     | (b) Give reasons for non-participation at each stage                                                                                                                                                         | NA        |
|                          |     | (c) Consider use of a flow diagram                                                                                                                                                                           | NA        |
| Descriptive data         | 14* | (a) Give characteristics of study participants (eg demographic, clinical, social) and information on exposures and potential confounders                                                                     | 9         |
|                          |     | (b) Indicate number of participants with missing data for each variable of interest                                                                                                                          | Table 1,2 |
|                          |     | (c) Summarise follow-up time (eg, average and total amount)                                                                                                                                                  | 9         |
| Outcome data             | 15* | Report numbers of outcome events or summary measures over time                                                                                                                                               | Table 3   |
| Main results             | 16  | (a) Give unadjusted estimates and, if applicable, confounder-adjusted estimates and their precision (eg, 95% confidence interval). Make clear which confounders were adjusted for and why they were included | Table 2   |
|                          |     | (b) Report category boundaries when continuous variables were categorized                                                                                                                                    | Table 1,2 |
|                          |     | (c) If relevant, consider translating estimates of relative risk into absolute risk for a meaningful time period                                                                                             | NA        |
| Other analyses           | 17  | Report other analyses done—eg analyses of subgroups and interactions, and sensitivity analyses                                                                                                               | NA        |
| <b>Discussion</b>        |     |                                                                                                                                                                                                              |           |
| Key results              | 18  | Summarise key results with reference to study objectives                                                                                                                                                     | 12        |
| <b>Limitations</b>       |     |                                                                                                                                                                                                              |           |
| Interpretation           | 20  | Give a cautious overall interpretation of results considering objectives, limitations, multiplicity of analyses, results from similar studies, and other relevant evidence                                   | 14-15     |
| Generalisability         | 21  | Discuss the generalisability (external validity) of the study results                                                                                                                                        | 15-16     |
| <b>Other information</b> |     |                                                                                                                                                                                                              |           |
| Funding                  | 22  | Give the source of funding and the role of the funders for the present study and, if applicable, for the original study on which the present article is based                                                | 17        |

\*Give information separately for cases and controls in case-control studies and, if applicable, for exposed and unexposed groups in cohort and cross-sectional studies.

**Note:** An Explanation and Elaboration article discusses each checklist item and gives methodological background and published examples of transparent reporting. The STROBE checklist is best used in conjunction with this article (freely available on the Web sites of PLoS Medicine at <http://www.plosmedicine.org/>, Annals of Internal Medicine at <http://www.annals.org/>, and Epidemiology at <http://www.epidem.com/>). Information on the STROBE Initiative is available at [www.strobe-statement.org](http://www.strobe-statement.org).

# BMJ Open

## Combining CD4 recovery and CD4/CD8 ratio restoration as an indicator for evaluating the outcome of continued antiretroviral therapy: an observational cohort study

|                                 |                                                                                                                                                                                                                                                                                                                                                                                                                                                                                                                                                                                            |
|---------------------------------|--------------------------------------------------------------------------------------------------------------------------------------------------------------------------------------------------------------------------------------------------------------------------------------------------------------------------------------------------------------------------------------------------------------------------------------------------------------------------------------------------------------------------------------------------------------------------------------------|
| Journal:                        | <i>BMJ Open</i>                                                                                                                                                                                                                                                                                                                                                                                                                                                                                                                                                                            |
| Manuscript ID                   | bmjopen-2017-016886.R1                                                                                                                                                                                                                                                                                                                                                                                                                                                                                                                                                                     |
| Article Type:                   | Research                                                                                                                                                                                                                                                                                                                                                                                                                                                                                                                                                                                   |
| Date Submitted by the Author:   | 05-Jun-2017                                                                                                                                                                                                                                                                                                                                                                                                                                                                                                                                                                                |
| Complete List of Authors:       | Lee, Shui Shan; The Chinese University of Hong Kong, Stanley Ho Centre for Emerging Infectious Diseases<br>Wong, Ngai Sze; The Chinese University of Hong Kong, Stanley Ho Centre for Emerging Infectious Diseases<br>Wong, Bonnie; Department of Health, Hong Kong Special Administrative Region Government, Special Preventive Programme<br>Wong, Ka Hing; Department of Health, Hong Kong Special Administrative Region Government, Special Preventive Programme<br>Chan, Kenny; Department of Health, Hong Kong Special Administrative Region Government, Special Preventive Programme |
| <b>Primary Subject Heading</b>: | HIV/AIDS                                                                                                                                                                                                                                                                                                                                                                                                                                                                                                                                                                                   |
| Secondary Subject Heading:      | Immunology (including allergy), Infectious diseases                                                                                                                                                                                                                                                                                                                                                                                                                                                                                                                                        |
| Keywords:                       | antiretroviral therapy, CD4, CD8, CD4/CD8 ratio, immune outcome                                                                                                                                                                                                                                                                                                                                                                                                                                                                                                                            |
|                                 |                                                                                                                                                                                                                                                                                                                                                                                                                                                                                                                                                                                            |

SCHOLARONE™  
Manuscripts

1  
2  
3 **Combining CD4 recovery and CD4/CD8 ratio restoration as an indicator for**  
4 **evaluating the outcome of continued antiretroviral therapy: an observational**  
5 **cohort study**  
6  
7  
8

9 **Running title:** Immune outcome following antiretroviral therapy  
10

11  
12  
13  
14 Shui Shan Lee<sup>1</sup>, Ngai Sze Wong<sup>1,2\*</sup>, Bonnie Chun Kwan Wong<sup>3</sup>, Ka Hing Wong<sup>3</sup>,  
15  
16 Kenny Chi Wai Chan<sup>3</sup>  
17  
18  
19

20  
21 <sup>1</sup>Stanley Ho Centre for Emerging Infectious Diseases, The Chinese University of  
22  
23 Hong Kong, Hong Kong, People's Republic of China;  
24

25 <sup>2</sup>Institute for Global Health & Infectious Diseases, University of North Carolina at  
26  
27 Chapel Hill, Chapel Hill, United States;  
28

29 <sup>3</sup>Special Preventive Programme, Centre for Health Protection, Department of Health,  
30  
31 Hong Kong Special Administrative Region Government, Hong Kong, People's  
32  
33 Republic of China;  
34  
35  
36  
37

38 **\*Corresponding author**

39  
40 Dr. Ngai Sze Wong

41  
42 Stanley Ho Centre for Infectious Diseases

43  
44 Postgraduate Education Centre

45  
46 Prince of Wales Hospital

47  
48 Shatin

49  
50 Hong Kong

51  
52 Tel: (852) 22528813

53  
54 Fax: (852) 26354977  
55  
56  
57  
58  
59  
60



1  
2  
3 Email: [candy\\_wong@cuhk.edu.hk](mailto:candy_wong@cuhk.edu.hk)  
4

5 **Keywords:** antiretroviral therapy; CD4; CD8; CD4/CD8 ratio; immune outcome  
6  
7

8  
9 **Word Count:**  
10

11 **Abstract:** 239 words; **Main text:** 3242 words  
12  
13  
14  
15  
16  
17  
18  
19  
20  
21  
22  
23  
24  
25  
26  
27  
28  
29  
30  
31  
32  
33  
34  
35  
36  
37  
38  
39  
40  
41  
42  
43  
44  
45  
46  
47  
48  
49  
50  
51  
52  
53  
54  
55  
56  
57  
58  
59  
60

For peer review only

**ABSTRACT**

**Objectives.** Immune recovery following highly active antiretroviral therapy (HAART) is commonly assessed by the degree of CD4 reconstitution alone. In this study, we aimed to assess immune recovery by incorporating both CD4 count and CD4/CD8 ratio.

**Design:** Observational cohort study

**Setting and participants.** Clinical data from Chinese HIV+ patients attending the largest HIV service in Hong Kong and who had been on HAART for  $\geq 4$  years were accessed.

**Main outcome measures.** Optimal immune outcome was defined as a combination of a CD4 count  $\geq 500/\mu\text{L}$  and a CD4/CD8 ratio  $\geq 0.8$ .

**Results.** A total of 718 patients were included for analysis (6353 person-years). At the end of Year 4, 318 out of 715 patients achieved CD4  $\geq 500/\mu\text{L}$ , of which only 33% (105 out of 318) concurrently achieved CD4/CD8 ratio  $\geq 0.8$ . Patients with a pre-HAART CD8  $\leq 800/\mu\text{L}$  (428 out of 704) were more likely to be optimal immune outcome achievers with CD4  $\geq 500/\mu\text{L}$  and CD4/CD8 ratio  $\geq 0.8$ , the association of which was stronger after adjusting for pre-HAART CD4 counts. In a multivariable logistic model, optimal immune outcome was positively associated with male gender, younger pre-HAART age and higher pre-HAART CD4 count, longer duration of HAART and pre-HAART CD8  $\leq 800/\mu\text{L}$ . Treatment regimen and cumulative viral loads played no significant role in the pattern of immune recovery.

**Conclusions.** A combination of CD4 count and CD4/CD8 ratio could be a useful approach for the characterisation of treatment outcome over time, on top of monitoring CD4 count alone.

**Strengths and limitations of this study**

- The combined use of CD4 and CD4/CD8 ratio as an outcome measure offers a new perspective for measuring immune recovery following antiretroviral therapy.
- The combined marker could avoid overestimation of treatment performance in patients with CD4 count but low CD4/CD8 ratio.
- The study was limited by not having included clinical events in the analysis, a gap which should be filled in larger scale cohort studies.

## INTRODUCTION

Highly active antiretroviral therapy (HAART) forms the cornerstone of modern day treatment of human immunodeficiency virus (HIV) infection. In monitoring treatment outcome, peripheral blood CD4+ lymphocyte (hereafter referred as CD4) count measurement is widely used, the results of which feature a rapid rise in the first 3-6 months followed by a second phase of gradual increase, plateauing 4 to 6 years afterwards.<sup>1</sup> Nadir CD4 counts and advanced age are associated with poorer CD4 recovery, a well-reported phenomenon that has been reviewed in the literature.<sup>1,2</sup>

While high and persistently elevated CD8+ lymphocytes (hereafter referred as CD8) is commonly observed in chronically infected HIV patients, relatively little attention has been paid to its impact on immunological recovery.<sup>3</sup> A large cohort study suggested that markedly elevated CD8 count at HAART initiation was associated with a poor increase in CD4 count.<sup>4</sup> Host factors aside, virus burden exerted by HIV could also impact immunological recovery. In the absence of timely and effective HAART, HIV cumulate over time leading to a state of cumulative viraemia, a predictor of suboptimal immunological outcome in primary HIV infection.<sup>5</sup> Separate studies have shown that high cumulative viral load was a potential marker for progression to acquired immune deficiency syndrome (AIDS) in chronic HIV infection.<sup>6</sup> Despite effective therapy, some 20-30% of patients were unable to achieve optimal immunological recovery,<sup>1,7</sup> an outcome resulting from the interaction of a good range of host and viral factors, as well as co-infection with other pathogens, notably hepatitis C virus.<sup>3</sup>

Over the last decade, a CD4-guided approach to treatment initiation has gradually

1  
2  
3 been replaced by early initiation of HAART irrespective of baseline CD4 level.<sup>8</sup>  
4  
5 Achievement of a high CD4 count of, say, over 500/ $\mu$ L remains a commonly used  
6  
7 marker of immune restoration. Knowingly, prompt treatment and full viral  
8  
9 suppression do not imply freedom from co-morbidities, as HIV disease is also  
10  
11 characterised by a state of immune activation, with the emergence of non-AIDS  
12  
13 morbidity and mortality.<sup>9</sup> This morbid state of immune activation cannot be inferred  
14  
15 from the pattern of CD4 recovery alone. Failure of CD4/CD8 normalisation following  
16  
17 HAART has however been linked to this scenario of immune activation.<sup>10 11</sup> Low  
18  
19 CD4/CD8 ratio was observed in patients despite high CD4 level (>500/ $\mu$ L).<sup>12</sup> A high  
20  
21 CD8 count following HAART was shown to be associated with inflammatory  
22  
23 non-AIDS-related clinical events, and in fact a higher risk of myocardial infarction  
24  
25 has been reported.<sup>4 13</sup> Apparently, a target CD4 count is inadequate for reflecting  
26  
27 effective immune recovery. Concurrent rise of the CD4/CD8 ratio is increasingly  
28  
29 recognized as an important marker of immune reconstitution.<sup>10 14</sup>  
30  
31  
32  
33  
34  
35

36 To better monitor immunological recovery following HAART, new biomarkers are  
37  
38 needed, which should preferably be derived from routinely collected laboratory data.  
39  
40 Optimal outcome could be founded on CD4/CD8 normalization on top of the  
41  
42 regularly monitored CD4 count. In this study, we define HAART associated immune  
43  
44 recovery by a combination of CD4 outcome and CD4/CD8 restoration. We set out to  
45  
46 examine its predictors by analysing regularly collected viral load and immunological  
47  
48 data, the latter including CD8 count, in a cohort of HIV patients following HAART.  
49  
50  
51  
52  
53  
54  
55

## 56 **METHODS**

57  
58  
59  
60

1  
2  
3  
4  
5 Anonymous clinical data from Integrated Treatment Centre, the largest HIV clinical  
6 service in Hong Kong were accessed for this observational study. Data access  
7 approval was granted by Department of Health, Hong Kong Special Administrative  
8 Region Government in compliance with the Personal Data (Privacy) Ordinance.  
9  
10 Individual consent for the study was waived following approval of the Joint Chinese  
11 University of Hong Kong – New Territories East Cluster Clinical Research Ethics  
12 Committee (CREC). HIV patients of age  $\geq 18$  diagnosed in 1985-2012, on HAART  
13 continuously for  $\geq 4$  years without treatment interruption, with at least 1 CD4  
14 measurement during treatment and with viral load fully suppressed (without  
15 consecutive viral load  $> 500$  copies/mL in the first 4 years on treatment) were selected.  
16  
17 We included patients who were treatment naïve or have been on non-standard  
18 treatment for  $< 1$  year before HAART initiation. Data retrieved were: (a) CD4 and  
19 CD8 counts at diagnosis, before HAART initiation and 3-4 monthly subsequently, (b)  
20 viral load levels at the respective time-points, (c) AIDS diagnosis and the timing, as  
21 appropriate, (d) antiretroviral treatment date and regimens, differentiated as protease  
22 inhibitor (PI) or non-nucleoside reverse transcriptase inhibitor (NNRTI) based as  
23 other regimens were rarely used for treatment naïve patients  
24  
25  
26  
27  
28  
29  
30  
31  
32  
33  
34  
35  
36  
37  
38  
39  
40  
41  
42  
43  
44

45 Estimated cumulative viral load was expressed as  $\text{years} * \log_{10} \text{copies/mL}$ , in  
46 accordance with the method reported by Zoufaly et al.<sup>15</sup> with modifications. Patients  
47 with available negative HIV testing result within 3 years before HIV diagnosis were  
48 included, so that one's seroconversion date could be estimated with confidence.<sup>16</sup> In  
49 brief, the products of the  $\log_{10}$  viral load were summed from estimated seroconversion  
50 to subsequent specified time-point(s), with the computation of the highest viral load  
51  
52  
53  
54  
55  
56  
57  
58  
59  
60

1  
2  
3 for the undiagnosed interval and an upward adjustment by  $1 \log_{10}$  for the presumed  
4 primary infection period. The time of seroconversion was determined as the mid-point  
5 between last negative and first positive HIV antibody testing dates. On the other hand,  
6 optimal immune outcome was defined as the achievement of a CD4 count of  $\geq 500/\mu\text{L}$   
7 and a CD4/CD8 ratio  $\geq 0.8$ <sup>17</sup> while conventional outcome was defined as achieving  
8 CD4 count of  $\geq 500/\mu\text{L}$  but not CD4/CD8 ratio  $\geq 0.8$  within specific time. Late HIV  
9 diagnosis was defined as the diagnosis of AIDS within 3 months of HIV diagnosis.  
10 The latest CD4 and CD8 measurements  $\leq 30$  days before HAART initiation were used  
11 as the baseline.  
12  
13  
14  
15  
16  
17  
18  
19  
20  
21  
22  
23  
24

25 Comparisons between pre-HAART CD8  $> 800/\mu\text{L}$  vs  $\leq 800/\mu\text{L}$  were made by odds ratio  
26 (OR) and multivariable logistic regression with pre-HAART CD4 as confounder,  
27 while correlation coefficients were calculated to test the associations between CD4  
28 and CD8 before and 4 years after HAART. The CD8 threshold was adopted by taking  
29 reference from the criteria of high CD8 count (i.e. over  $800/\mu\text{L}$ ) during primary  
30 infection reported in another study.<sup>18</sup> CD4 (maximum value), CD8 (minimum value)  
31 and CD4/CD8 ratio (maximum value) of patients achieving optimal immune outcome  
32 and conventional outcome by Year 4 on HAART over time ( $\leq 12$  months, 12.1-24  
33 months, ... ,  $> 96$  months) were compared in generalized estimating equations (GEE).  
34 Multivariable logistic regression model (stepwise) was applied to examine the  
35 predictors of optimal immune outcome and conventional outcome. Complete case  
36 analysis was performed. Loss to follow-up and death were data end points. Statistical  
37 tests were performed in SPSS.  
38  
39  
40  
41  
42  
43  
44  
45  
46  
47  
48  
49  
50  
51  
52  
53  
54  
55  
56  
57  
58  
59  
60

## RESULTS

As of the end of 2012, data of 2974 diagnosed adults were accessed. Of these, 718 eligible treatment-naïve diagnosed cases who had been on HAART continuously for  $\geq 4$  years were included in the study. Their case records contained 18857 clinical measurements (18693 CD4, 18521 CD8 and/or 17776 viral load measurements) at multiple time points spanning over 6353 person-years' follow-up. General characteristics of the study population are displayed in Table 1. Overall, a majority (84%) were male with a median age at diagnosis of 37 years (interquartile range (IQR): 31 – 45 years). The median interval from diagnosis to the latest assessment was 100 months (IQR= 74-141 months). Most were infected by either HIV-1 subtype B (31%) or CRF01\_AE (38%), with men who have sex with men (MSM) accounting for 39% of the study population. The pre-HAART median CD4 and CD8 counts were 109/ $\mu\text{L}$  and 673/ $\mu\text{L}$  respectively, which were positively correlated (Pearson correlation coefficient  $r = 0.50$ ,  $p < 0.001$ ) (See web-only Supplementary Figure 1(d)). The distribution of CD4 and CD4/CD8 ratio at baseline before initiation of HAART is shown in Supplementary Table 1(a). The life-time estimated cumulative viral load at the last assessment increased with the interval between seroconversion and HAART initiation ( $r = 0.94$ ,  $p < 0.001$ ).

During the study period, a CD4-guided approach was in place, implying that HAART was recommended when one's CD4 count fell below 350/ $\mu\text{L}$ . A majority of the patients (74%) had been started on a PI-based with 25% on NNRTI-based regimen, and 1 % had been started on non-standard regimen subsequently changed to HAART within 1 year. Integrase Inhibitors (INSTI) had not been used as a component of one's



1  
2  
3 first regimen, but 3 patients had changed to raltegravir-based regimen  
4  
5 afterwards.(Table 1). The median treatment duration was 85.38 months (IQR: 63.39 to  
6  
7 117.32). As of the end of a 4-year observation period, the CD4 count of 318 patients  
8  
9 (44%) had reached 500/ $\mu$ L or above, of which 105 (33%) gave a CD4/CD8 ratio of  
10  
11  $\geq 0.8$  concurrently, while 205 (64%) patients reached the CD4 target but not the ratio.  
12  
13 On the other hand, 145 patients reached the optimal ratio, of which 32 (22%) patients  
14  
15 could not reach the CD4 target. (Table 2) The temporal changes of CD4 count, CD8  
16  
17 count and CD4/CD8 ratio over time is shown in figure 1, while distribution of CD4  
18  
19 and CD4/CD8 ratio at the end of Year 4 is shown in Supplementary Table 1(b).  
20  
21 Whereas both CD4 count (figure 1(a)) and CD4/CD8 ratio (figure 1(e)) showed a  
22  
23 steady rise from the first time-point following HAART, the temporal pattern of CD8  
24  
25 counts was inconspicuous (figure 1(c)). Patients with optimal immune outcome had  
26  
27 significantly higher median CD4 and CD4/CD8 ratio but lower CD8 count than those  
28  
29 only with satisfactory CD4 recovery (conventional outcome) in all time points (GEE  
30  
31 model results in Supplementary Table 2). The CD4 count at Year 4 was positively  
32  
33 correlated with pre-HAART CD4 ( $r=0.38$ ,  $p<0.001$ )(See web-only Supplementary  
34  
35 Figure 1(a)) Categorised by one's pre-HAART CD8 count, about half ( $n=428$ , 61%)  
36  
37 had a lower count of  $\leq 800/\mu$ L. The 2 groups had similar demographic, cumulative  
38  
39 viral load levels and had received similar treatment regimens. The CD4 count at Year  
40  
41 4 was positively correlated with pre-HAART CD8 count ( $r=0.18$ ,  $p<0.001$ ) (See  
42  
43 web-only Supplementary Figure 1(b)) whereas the latter was also positively correlated  
44  
45 with CD8 at Year 4.( $r=0.35$ ,  $p<0.001$ ) (See web-only Supplementary Figure 1(c)).  
46  
47 After adjusting for pre-HAART CD4, patients with lower pre-HAART CD8 had  
48  
49 higher chance of achieving a higher CD4/CD8 ratio at Year 4 (adjusted OR  
50  
51 (aOR)=64.63, 95%C.I.=23.47 to 177.98) (Table 3). Likewise, a low pre-HAART CD8  
52  
53  
54  
55  
56  
57  
58  
59  
60

1  
2  
3 count of  $\leq 800/\mu\text{L}$  was associated with the optimal immune outcome at Year 4, with an  
4 increased odds (aOR=5.07, 95%C.I.=2.74-9.41) after adjusting for pre-HAART CD4.  
5  
6  
7 There was no significant correlation between Year 4 CD8 and pre-HAART CD4 (See  
8 web-only Supplementary Figure 1(e)), but positive association between CD4 and CD8  
9  
10 web-only Supplementary Figure 1(e)), but positive association between CD4 and CD8  
11 at Year 4 ( $r=0.33$ ,  $p<0.001$ ) could be demonstrated (See web-only Supplementary  
12 Figure 1(f)).  
13  
14  
15  
16  
17  
18  
19

20 The following independent variables were then tested for their prediction of optimal  
21 immune outcome and conventional outcome achieved since treatment initiation  
22 throughout the observation period: pre-HAART CD4, pre-HAART CD8, pre-HAART  
23 age, treatment duration and male gender. In the final model, both high pre-HAART  
24 CD4 and low pre-HAART CD8 were significant predictors of optimal immune  
25 outcome, while only the former was a significant predictor of conventional outcome  
26 (Table 4). Patients who were male and started HAART at younger age were more  
27 likely to achieve both outcomes. Patients on treatment for longer time ( $\geq 97$ months)  
28 had higher odds to achieve optimal immune outcome (aOR=3.34, 95%C.I.=2.17 to  
29 5.15, 49-72 months as reference) than conventional outcome (aOR=2.78,  
30 95%C.I.=1.89 to 4.09, 49-72 months as reference). As a sub-study (results not shown),  
31 we have performed another set of GEE models with cumulative viral load as an  
32 independent variable (results not shown). The results did not support it as a significant  
33 predictor of an optimal immune outcome both in CD4 count and CD4/CD8 ratio,  
34 though the number of patients eligible for the analyses was only 187.  
35  
36  
37  
38  
39  
40  
41  
42  
43  
44  
45  
46  
47  
48  
49  
50  
51  
52  
53  
54  
55

## 56 DISCUSSION

57  
58  
59  
60

1  
2  
3  
4  
5 Pre-HAART CD4 count has long been shown to be a predictor of immunological  
6  
7 outcome 3-5 years following antiretroviral therapy.<sup>1</sup> Our previous longitudinal studies  
8  
9 in a cohort of Chinese HIV patients have demonstrated positive associations between  
10  
11 nidus and maximum CD4 count over 5 years irrespective of the causative virus  
12  
13 subtype or the regimens prescribed.<sup>19 20</sup> In assessing antiretroviral treatment response,  
14  
15 however, CD4 count alone appeared to add little to viral load monitoring.<sup>21</sup> To  
16  
17 account for the potential risk of non-AIDS related comorbidities including metabolic  
18  
19 complications,<sup>9</sup> parallel CD4/CD8 ratio testing is gaining popularity as it reflects also  
20  
21 the intensity of chronic inflammation implicated.<sup>9 10</sup> In this study, a CD4 count  
22  
23  $\geq 500/\mu\text{L}$  in conjunction with a ratio of  $\geq 0.8$  was examined as a target outcome  
24  
25 indicator for chronically infected patients on continued antiretroviral therapy. This  
26  
27 target was achieved in 15% (105 out of 715) of our patients at the end of a 4-year  
28  
29 treatment period. Both pre-HAART CD4 and CD8 count, as well as the treatment  
30  
31 interval were independent predictors of this new outcome target. While CD4 remained  
32  
33 a useful prognostic marker, using it as the sole marker might overestimate treatment  
34  
35 performance by including patients with high CD4 count but high CD8 count and low  
36  
37 CD4/CD8 ratio as achiever (205 out of 715 achieved CD4 target only).  
38  
39  
40  
41  
42  
43  
44

45 In this study, we have shown that 44% of patients on HAART achieved a CD4 count  
46  
47  $\geq 500/\mu\text{L}$  at the end of 4 years, an outcome slightly poorer than that of 59% reported  
48  
49 by the Swiss HIV Cohort Study, a discrepancy which could be attributed to our  
50  
51 shorter observation period (4 instead of 5 years) and the lower median pre-HAART  
52  
53 CD4 count (158/ $\mu\text{L}$  compared to 180/ $\mu\text{L}$ ).<sup>22</sup> As concluded in the recently published  
54  
55 “START” study examining the benefits of the initiation of antiretroviral therapy in  
56  
57  
58  
59  
60

1  
2  
3 HIV-positive adults with a CD4 count  $>500/\mu\text{L}$ , CD4 count *per se* could not capture  
4 all outcome effects arising from immediate HAART in chronic HIV infection.<sup>23</sup> Our  
5 study confirmed that CD4/CD8 ratio could be a readily available supplementary  
6 marker to monitor immune recovery. Evidently, the ratio may vary with lengths of  
7 observations, demographics, and/or even HAART regimens.<sup>17 24 25</sup> As the CD4/CD8  
8 ratio tended to rise more slowly than CD4 recovery, we have chosen an interim ratio  
9 of 0.8<sup>17</sup> to assess the state of immune recovery at 4 years after HAART initiation.  
10 Normalisation to a ratio of 1 could in fact be demonstrated in 13% of patients within 7  
11 years, the median observation interval of our cohort.  
12  
13  
14  
15  
16  
17  
18  
19  
20  
21  
22  
23

24  
25 Pre-HAART CD8 count and its normalisation following antiretroviral treatment is  
26 relatively under-investigated.<sup>26 27</sup> In our study, pre-HAART CD4 and pre-HAART  
27 CD8 counts were positively correlated. It was noted that heterosexuals gave a lower  
28 pre-HAART CD8 (Table 3) compared to MSM but the difference became insignificant  
29 after the adjustment of pre-HAART CD4. Over time, CD4 rise went in parallel with  
30 slowly falling CD8 until reaching an optimal CD4 level of  $\geq 500/\mu\text{L}$  with a  
31 near-normalised CD4/CD8 ratio  $\geq 0.8$  at Year 4. Pre-HAART CD8 was a significant  
32 predictor of optimal immune outcome but not conventional outcome. The median  
33 CD8 count of former group was lower than latter group of patients in all time points  
34 since HAART initiation. Significant expansion of CD8 is known to occur soon after  
35 infection and the phenomenon might persist throughout the course of HIV infection.  
36 Recent studies suggested that CD8 normalisation was associated with early initiation  
37 of HAART during acute infection.<sup>18</sup> HIV-specific CD8 has been proposed to play an  
38 important role in effecting functional cure of HIV infection.<sup>28</sup> Its relationship with the  
39 absolute count of CD8 before and after HAART has not been established. With the  
40  
41  
42  
43  
44  
45  
46  
47  
48  
49  
50  
51  
52  
53  
54  
55  
56  
57  
58  
59  
60

1  
2  
3 growing evidence of the role of CD4/CD8 ratio as a new biomarker for non-AIDS  
4 morbidity and chronic inflammation,<sup>9 10 29 30</sup> it is possible that HIV+ patients' clinical  
5 outcome could be better explained from both the ratio and CD4 count rather than from  
6 the latter alone. From a virological perspective, the estimated cumulative viral load  
7 can be viewed as a surrogate of prolonged non-suppression of virus load. It does not  
8 however independently predict CD4 or CD4/CD8 ratio outcomes. Apparently, its  
9 immunological impacts could be overtaken by a long interval of HAART, if the  
10 pre-HAART CD4 and CD8 status were optimal. Overall, our results lent support to  
11 early initiation of HAART in chronic HIV infection to avoid temporal accumulation  
12 of virus, a conclusion similar to that for primary HIV infection.<sup>5</sup>

13  
14  
15  
16  
17  
18  
19  
20  
21  
22  
23  
24  
25  
26  
27 We acknowledge that our study carries a number of limitations. Foremost, all patients  
28 had been on HAART during the time when a CD4-guided approach to treatment  
29 initiation was enforced. As the patients had been started on either a PI-based or  
30 NNRTI-based regimen, the possible impacts of newer generations of antiretroviral  
31 like INSTI could not be ascertained. The results should therefore be interpreted with  
32 caution, especially that strong association between INSTI-based regimen and  
33 CD4/CD8 normalisation has recently been reported.<sup>31</sup> These were selection bias  
34 which might have limited the extrapolation of results to the entire HIV population. In  
35 addition, our dataset did not include other inflammatory or infectious outcomes (e.g.  
36 HCV and/or cytomegalovirus co-infections<sup>32-35</sup>) and therefore these could not be  
37 analysed in perspective. As the main comparative period was 4 years, the minimum  
38 treatment duration of study population, the immunological recovery achieved by  
39 patients in this study may not necessarily be reflecting the ultimate response to  
40 HAART. We have nevertheless evaluated the outcome (comprising both CD4 count  
41  
42  
43  
44  
45  
46  
47  
48  
49  
50  
51  
52  
53  
54  
55  
56  
57  
58  
59  
60

1  
2  
3 and CD4/CD8 ratio) of all enrolled patients with a median duration of treatment of  
4  
5 over 6 years in the final analysis. Theoretically, cohorts with patients observed  
6  
7 throughout their lifetime would be invaluable to determine the health benefits of  
8  
9 HAART. Analyses from such life-long cohorts should become a reality in the coming  
10  
11 years or decades.  
12

## 13 14 15 16 17 18 **CONCLUSIONS** 19

20  
21  
22 Conventionally, CD4 count has been commonly used as the main outcome marker  
23 following HAART. In light of the increasing incidence of co-morbidities associated  
24 with HIV related chronic inflammations, CD4 count per se appears to carry little  
25 prognostic value in predicting HAART-associated immune recovery. Our results  
26 suggested that a combination of CD4 count and CD4/CD8 ratio offers another  
27 potentially useful approach to assessing immune outcome, compared to the use of  
28 CD4 alone. In evaluating immune recovery following long-term HIV viral  
29 suppression, pre-HAART CD8 count could be as important as nadir CD4 count as the  
30 independent predictors of the ultimate immune outcome. As both CD4 and CD8 are  
31 often routinely collected in the course of HIV management, an assessment of the  
32 temporal trends of CD4, CD8 and CD4/CD8 ratio could conveniently predict the  
33 immunological outcome without the need for sophisticated immune markers.  
34  
35 Virological impact, as inferred from the estimated cumulative viral load after infection,  
36 does not however add to the outcome reflected from viral load suppression. The  
37 monitoring of the host immunological responses remains the most important approach  
38 in assessing treatment outcome following HAART.  
39  
40  
41  
42  
43  
44  
45  
46  
47  
48  
49  
50  
51  
52  
53  
54  
55  
56  
57  
58  
59  
60

### **Acknowledgements**

The authors thank all staff of the Integrated Treatment Centre for their contribution to the delivery of quality clinical care to patients whose data were accessed for use in the analyses described in the manuscript. Li Ka Shing Institute for Health Sciences at The Chinese University of Hong Kong is acknowledged for technical support in developing the analyses. NS was supported by Guangdong Provincial Centers for Skin Diseases and STI Control, the UNC-South China STD Research Training Center (FIC1D43TW009532-01) and NIH Fogarty International Center.

### **Contributors**

SSL motivated and designed the study. KHW, BCKW, KCWC contributed the data and their interpretation. NSW analysed the data. SSL wrote the article. All authors contributed to interpretation of results and critically reviewed and edited the article.

### **Funding**

The study was supported by Health and Medical Research Fund (Project code: CU-15-A15) of the Food and Health Bureau, Hong Kong Special Administrative Region Government. The funder did not have any role in study design, analysis and interpretation of data and drafting the manuscript.

### **Competing interests**

The authors declare that there is no conflict of interest.

**Ethics approval**

Data access approval was granted by Department of Health, Hong Kong Special Administrative Region Government in compliance with the Personal Data (Privacy) Ordinance. Individual consent for the study was waived following approval of the Joint Chinese University of Hong Kong – New Territories East Cluster Clinical Research Ethics Committee (CREC).

**Data sharing statement**

No additional data are available

**Disclaimer**

The opinions and assertions contained herein are private views of the authors and do not necessarily reflect those of the Centre for Health Protection, Hong Kong Special Administrative Region Government Department of Health, or the other affiliating institutions.



## REFERENCES

1. Battegay M, Nüesch R, Hirschel B, et al. Immunological recovery and antiretroviral therapy in HIV-1 infection. *The Lancet Infectious Diseases* 2006;6:280-87. doi: 10.1016/S1473-3099(06)70463-7
2. Gazzola L, Tincati C, Bellistri GM, et al. The absence of CD4+ T cell count recovery despite receipt of virologically suppressive highly active antiretroviral therapy: clinical risk, immunological gaps, and therapeutic options. *Clinical infectious diseases : an official publication of the Infectious Diseases Society of America* 2009;48(3):328-37. doi: 10.1086/595851
3. Tsiara CG, Nikolopoulos GK, Dimou NL, et al. Effect of hepatitis C virus on immunological and virological responses in HIV-infected patients initiating highly active antiretroviral therapy: a meta-analysis. *J Viral Hepat* 2013;20(10):715-24. doi: 10.1111/jvh.12101
4. Helleberg M, Kronborg G, Ullum H, et al. Course and Clinical Significance of CD8+ T-Cell Counts in a Large Cohort of HIV-Infected Individuals. *J Infect Dis* 2015;211(11):1726-34. doi: 10.1093/infdis/jiu669
5. Seng R, Goujard C, Krastinova E, et al. Influence of lifelong cumulative HIV viremia on long-term recovery of CD4+ cell count and CD4+/CD8+ ratio among patients on combination antiretroviral therapy. *AIDS (London, England)* 2015;29:595-607. doi: 10.1097/QAD.0000000000000571
6. Marconi VC, Grandits G, Okulicz JF, et al. Cumulative viral load and virologic decay patterns after antiretroviral therapy in HIV-infected subjects influence CD4 recovery and AIDS. *PLoS One* 2011;6(5):e17956. doi: 10.1371/journal.pone.0017956
7. Gaardbo JC, Hartling HJ, Gerstoft J, et al. Incomplete immune recovery in HIV infection: mechanisms, relevance for clinical care, and possible solutions. *Clin Dev Immunol* 2012;2012:670957. doi: 10.1155/2012/670957
8. World Health Organization. WHO | Guideline on when to start antiretroviral therapy and on pre-exposure prophylaxis for HIV 2015 [updated 2015-10-09 06:58:51].
9. Saracino A, Bruno G, Scudeller L, et al. Chronic inflammation in a long-term cohort of HIV-infected patients according to the normalization of the CD4:CD8 ratio. *AIDS research and human retroviruses* 2014;30:1178-84. doi: 10.1089/aid.2014.0080
10. Mussini C, Lorenzini P, Cozzi-Lepri A, et al. CD4/CD8 ratio normalisation and non-AIDS-related events in individuals with HIV who achieve viral load suppression with antiretroviral therapy: an observational cohort study. *Lancet HIV* 2015;2(3):e98-106. doi: 10.1016/S2352-3018(15)00006-5
11. Lu W, Mehraj V, Vyboh K, et al. CD4:CD8 ratio as a frontier marker for clinical outcome, immune dysfunction and viral reservoir size in virologically suppressed HIV-positive patients. *J Int AIDS Soc* 2015;18:20052. doi: 10.7448/IAS.18.1.20052
12. Serrano-Villar S, Sainz T, Lee SA, et al. HIV-infected individuals with low CD4/CD8 ratio despite effective antiretroviral therapy exhibit altered T cell subsets, heightened CD8+ T cell activation, and increased risk of non-AIDS morbidity and mortality. *PLoS Pathog* 2014;10(5):e1004078. doi:

- 10.1371/journal.ppat.1004078
13. Badejo OA, Chang CC, So-Armah KA, et al. CD8+ T-cells count in acute myocardial infarction in HIV disease in a predominantly male cohort. *Biomed Res Int* 2015;2015:246870. doi: 10.1155/2015/246870
  14. Serrano-Villar S, Deeks SG. CD4/CD8 ratio: an emerging biomarker for HIV. *Lancet HIV* 2015;2(3):e76-7. doi: 10.1016/S2352-3018(15)00018-1
  15. Zoufaly A, Stellbrink H-J, Heiden MAd, et al. Cumulative HIV viremia during highly active antiretroviral therapy is a strong predictor of AIDS-related lymphoma. *The Journal of Infectious Diseases* 2009;200:79-87. doi: 10.1086/599313
  16. Pantazis N, Porter K, Costagliola D, et al. Temporal trends in prognostic markers of HIV-1 virulence and transmissibility: an observational cohort study. *Lancet HIV* 2014;1(3):e119-26. doi: 10.1016/S2352-3018(14)00002-2
  17. Menozzi M, Zona S, Santoro A, et al. CD4/CD8 ratio is not predictive of multi-morbidity prevalence in HIV-infected patients but identify patients with higher CVD risk. *J Int AIDS Soc* 2014;17(4 Suppl 3):19709. doi: 10.7448/IAS.17.4.19709
  18. Cao W, Mehraj V, Trottier B, et al. Early Initiation Rather Than Prolonged Duration of Antiretroviral Therapy in HIV Infection Contributes to the Normalization of CD8 T-Cell Counts. *Clinical infectious diseases : an official publication of the Infectious Diseases Society of America* 2016;62(2):250-7. doi: 10.1093/cid/civ809
  19. Naftalin CM, Wong NS, Chan DP, et al. Three different patterns of CD4 recovery in a cohort of Chinese HIV patients following antiretroviral therapy - a five-year observational study. *International journal of STD & AIDS* 2015;26:803-09. doi: 10.1177/0956462414553826
  20. Wong NS, Reidpath DD, Wong KH, et al. A multilevel approach to assessing temporal change of CD4 recovery following HAART initiation in a cohort of Chinese HIV positive patients. *J Infect* 2015;70(6):676-8. doi: 10.1016/j.jinf.2014.10.012
  21. Ford N, Meintjes G, Pozniak A, et al. The future role of CD4 cell count for monitoring antiretroviral therapy. *Lancet Infect Dis* 2015;15(2):241-7. doi: 10.1016/S1473-3099(14)70896-5
  22. Kaufmann GR, Furrer H, Ledergerber B, et al. Characteristics, determinants, and clinical relevance of CD4 T cell recovery to <500 cells/microL in HIV type 1-infected individuals receiving potent antiretroviral therapy. *Clinical infectious diseases : an official publication of the Infectious Diseases Society of America* 2005;41(3):361-72. doi: 10.1086/431484
  23. INSIGHT START Study Group, Lundgren JD, Babiker AG, et al. Initiation of Antiretroviral Therapy in Early Asymptomatic HIV Infection. *N Engl J Med* 2015;373(9):795-807. doi: 10.1056/NEJMoa1506816
  24. Leung V, Gillis J, Raboud J, et al. Predictors of CD4:CD8 ratio normalization and its effect on health outcomes in the era of combination antiretroviral therapy. *PLoS One* 2013;8(10):e77665. doi: 10.1371/journal.pone.0077665
  25. Lichtenstein KA, Armon C, Nagabhushanam V, et al. A pilot study to assess inflammatory biomarker changes when raltegravir is added to a virologically suppressive HAART regimen in HIV-1-infected patients with limited immunological responses. *Antiviral Therapy* 2012;17:1301-09. doi:

- 1  
2  
3 10.3851/IMP2350  
4 26. Cao W, Mehraj V, Kaufmann DE, et al. Elevation and persistence of CD8 T-cells in  
5 HIV infection: the Achilles heel in the ART era. *J Int AIDS Soc* 2016;19(1):20697.  
6 doi: 10.7448/IAS.19.1.20697  
7  
8 27. Mudd JC, Lederman MM. CD8 T cell persistence in treated HIV infection. *Curr*  
9 *Opin HIV AIDS* 2014;9(5):500-5. doi: 10.1097/COH.0000000000000086  
10 28. Jones RB, Walker BD. HIV-specific CD8(+) T cells and HIV eradication. *J Clin Invest*  
11 2016;126(2):455-63. doi: 10.1172/JCI80566  
12 29. Serrano-Villar S, Perez-Elias MJ, Dronza F, et al. Increased risk of serious  
13 non-AIDS-related events in HIV-infected subjects on antiretroviral therapy  
14 associated with a low CD4/CD8 ratio. *PLoS One* 2014;9(1):e85798. doi:  
15 10.1371/journal.pone.0085798  
16 30. Sainz T, Serrano-Villar S, Diaz L, et al. The CD4/CD8 ratio as a marker T-cell  
17 activation, senescence and activation/exhaustion in treated HIV-infected  
18 children and young adults. *AIDS* 2013;27(9):1513-6. doi:  
19 10.1097/QAD.0b013e32835faa72  
20 31. De Salvador-Guillouet F, Sakarovitch C, Durant J, et al. Antiretroviral Regimens  
21 and CD4/CD8 Ratio Normalization in HIV-Infected Patients during the Initial  
22 Year of Treatment: A Cohort Study. *PLoS One* 2015;10(10):e0140519. doi:  
23 10.1371/journal.pone.0140519  
24 32. Saracino A, Bruno G, Scudeller L, et al. CD4 and CD4/CD8 ratio progression in  
25 HIV-HCV infected patients after achievement of SVR. *J Clin Virol* 2016;81:94-9.  
26 doi: 10.1016/j.jcv.2016.05.019  
27 33. Brites-Alves C, Netto EM, Brites C. Coinfection by Hepatitis C Is Strongly  
28 Associated with Abnormal CD4/CD8 Ratio in HIV Patients under Stable ART in  
29 Salvador, Brazil. *J Immunol Res* 2015;2015:174215. doi: 10.1155/2015/174215  
30 34. Freeman ML, Mudd JC, Shive CL, et al. CD8 T-Cell Expansion and Inflammation  
31 Linked to CMV Coinfection in ART-treated HIV Infection. *Clinical infectious*  
32 *diseases : an official publication of the Infectious Diseases Society of America*  
33 2016;62(3):392-6. doi: 10.1093/cid/civ840  
34 35. Smith DM, Nakazawa M, Freeman ML, et al. Asymptomatic CMV Replication  
35 During Early Human Immunodeficiency Virus (HIV) Infection Is Associated  
36 With Lower CD4/CD8 Ratio During HIV Treatment. *Clinical infectious diseases :*  
37 *an official publication of the Infectious Diseases Society of America*  
38 2016;63(11):1517-24. doi: 10.1093/cid/ciw612  
39  
40  
41  
42  
43  
44  
45  
46  
47  
48  
49  
50  
51  
52  
53  
54  
55  
56  
57  
58  
59  
60

**Table 1. General characteristics of study population (n=718)**

|                                        | frequency     | %            |
|----------------------------------------|---------------|--------------|
|                                        | <u>median</u> | <u>(IQR)</u> |
| <b>(a) Demographics</b>                |               |              |
| Male gender                            | 605           | 84%          |
| Ethnicity                              |               |              |
| Chinese                                | 581           | 81%          |
| Asian (Asian other than Chinese)       | 87            | 12%          |
| White                                  | 47            | 7%           |
| African                                | 3             | 0.4%         |
| Age (yrs, at HIV diagnosis)            | <u>37</u>     | (31 to 45)   |
| <b>(b) HIV infection and diagnosis</b> |               |              |
| Mode of transmission                   |               |              |
| heterosexual                           | 394           | 55%          |
| man-to-man sex                         | 280           | 39%          |
| injection drug use                     | 34            | 5%           |
| contaminated blood transfusion         | 6             | 1%           |
| undetermined                           | 4             | 1%           |
| HIV-1 Subtype                          |               |              |
| CRF01_AE                               | 270           | 38%          |
| B                                      | 224           | 31%          |
| C                                      | 8             | 1%           |
| Others                                 | 31            | 4%           |
| unavailable                            | 185           | 26%          |
| AIDS diagnosis before treatment        | 239           | 33%          |
| Late HIV diagnosis*                    | 192           | 27%          |

|                                                                                                  | frequency     | %                 |
|--------------------------------------------------------------------------------------------------|---------------|-------------------|
|                                                                                                  | <u>median</u> | <u>(IQR)</u>      |
| estimated cumulative viral load <sup>#</sup> from seroconversion to diagnosis (n=199)            | <u>8</u>      | (3 to 18)         |
| <b>(c) Pre-HAART status</b>                                                                      |               |                   |
| Age (yrs)                                                                                        | <u>39</u>     | (33 to 46)        |
| Months from diagnosis to treatment initiation                                                    | <u>8.67</u>   | (2.75 to 33.13)   |
| CD4 count (cells/ $\mu$ L)                                                                       | <u>109</u>    | (29 to 190)       |
| CD4/CD8 ratio <sup>a</sup>                                                                       | <u>0.14</u>   | (0.06 to 0.23)    |
| CD8 count (cells/ $\mu$ L) <sup>a</sup>                                                          | <u>673</u>    | (441 to 966)      |
| Viral load (log <sub>10</sub> copies/mL) <sup>b</sup>                                            | <u>5.15</u>   | (4.62 to 5.58)    |
| Estimated cumulative viral load <sup>#</sup> from seroconversion to treatment initiation (n=199) | <u>18</u>     | (11 to 29)        |
| <b>(d) Antiretroviral treatment and clinical outcomes</b>                                        |               |                   |
| First HAART regimen                                                                              |               |                   |
| NNRTI-based                                                                                      | 182           | 25%               |
| PI-based                                                                                         | 131           | 18%               |
| PI-based with booster                                                                            | 397           | 55%               |
| non-standard                                                                                     | 8             | 1%                |
| Total treatment duration (months)                                                                | <u>85.38</u>  | (63.39 to 117.32) |
| AIDS Free during treatment (n=479)                                                               | 456           | 95%               |
| Highest CD4 count within 4 years <sup>c</sup>                                                    | <u>476</u>    | (354 to 630)      |
| Highest CD4/CD8 ratio within 4 years <sup>d</sup>                                                | <u>0.55</u>   | (0.39 to 0.76)    |

|                                                              | frequency     | %            |
|--------------------------------------------------------------|---------------|--------------|
|                                                              | <u>median</u> | <u>(IQR)</u> |
| CD4 count $\geq 500/\mu\text{L}$ within 4 years <sup>c</sup> | 318           | 44%          |
| CD4/CD8 ratio $\geq 0.8$ within 4 years <sup>e</sup>         | 145           | 20%          |
| Deceased                                                     | 39            | 5%           |

\*Late HIV diagnosis refers to the diagnosis of AIDS within 3 months of HIV diagnosis

# Estimated cumulative viral load expressed as years\*log<sub>10</sub> viral load copies/mL

<sup>a</sup> 14 missing values; <sup>b</sup> 18 missing values; <sup>c</sup> 2 missing values; <sup>d</sup> 8 missing values; <sup>e</sup> 3 missing values

**Table 2 The profiles of immunological outcomes of patients by achievement of none, one or both of the 2 target immunological markers (CD4  $\geq$ 500, CD4/CD8 ratio  $\geq$ 0.8) before the end of a 4-year observation period#**

|                                                | no. | median peak or highest CD4 count (/μL) (IQR) | median months to CD4 target (IQR) | median peak or highest CD4:CD8 ratio (IQR) | median months to target CD4:CD8 ratio (IQR) |
|------------------------------------------------|-----|----------------------------------------------|-----------------------------------|--------------------------------------------|---------------------------------------------|
| CD4 $\geq$ 500/μL and CD4:CD8 ratio $\geq$ 0.8 | 105 | 741 (618 to 876)                             | 20.63 (12.6 to 30.53)             | 0.98 (0.86 to 1.2)                         | 28.90 (14.43 to 42.95)                      |
| Concurrent achievement of both targets         | 15  | 694 (569 to 1182)                            | 20.27 (13.07 to 28.17)            | 1.05 (0.9 to 1.49)                         | 20.27 (13.07 to 28.17)                      |
| CD4 target before ratio target                 | 57  | 788 (660 to 921)                             | 15.13 (8.7 to 22.88)              | 0.89 (0.83 to 0.99)                        | 39.23 (30.78 to 45.98)                      |
| Ratio target before CD4 target                 | 33  | 650 (547 to 764)                             | 31.13 (22.3 to 39.4)              | 1.17 (1.02 to 1.56)                        | 14.40 (8.68 to 24.08)                       |
| CD4 $\geq$ 500/μL only                         | 205 | 622 (552 to 723)                             | 29.10 (17.43 to 38.37)            | 0.59 (0.49 to 0.69)                        | /                                           |
| Ratio $\geq$ 0.8 only                          | 32  | 431 (369 to 475)                             | /                                 | 1.05 (0.89 to 1.17)                        | 29.32 (18.48 to 40.33)                      |
| CD4 target then changed to ratio target        | 4   | 588 (519 to 660)                             | 20.02 (12.23 to 35.36)            | 0.86 (0.81 to 0.95)                        | 36.83 (20.68 to 49.72)                      |
| Ratio target then changed to CD4 target        | 4   | 583 (521 to 636)                             | 29.68 (20.52 to 40.38)            | 0.87 (0.86 to 1.01)                        | 13.87 (5.48 to 25.45)                       |
| Failure to achieve both targets                | 365 | 362 (253 to 432)                             | /                                 | 0.43 (0.31 to 0.55)                        | /                                           |

#Equivalent to a maximum of <52 months with the inclusion of a 3-month buffer period;

**Table 3. Comparison between patients with high (>800/ $\mu$ L) and low ( $\leq$ 800/ $\mu$ L) pre-HAART CD8 counts**

Variables included in the analyses were (a) general baseline characteristics, (b) pre-HAART virological status, (c) antiretroviral therapy, and (d) outcome at year 4.

|                                     | pre-HAART<br>CD8 >800<br>(n=276) |                  | pre-HAART<br>CD8 $\leq$ 800<br>(n=428) |                  | Univariate<br>analysis |               | adjusted by<br>pre-HAART CD4 |               |
|-------------------------------------|----------------------------------|------------------|----------------------------------------|------------------|------------------------|---------------|------------------------------|---------------|
|                                     | median/<br><u>no.</u>            | IQR/<br><u>%</u> | median/<br><u>no.</u>                  | IQR/<br><u>%</u> | OR                     | 95% CI        | aOR                          | 95% CI        |
| <b>(a) Baseline characteristics</b> |                                  |                  |                                        |                  |                        |               |                              |               |
| Male gender                         | 242                              | 87.7%            | 352                                    | 82.2%            | 0.65                   | 0.42 to 1.01  | 1.82                         | 1.12 to 2.96* |
| Chinese ethnicity                   | 222                              | 80.4%            | 351                                    | 82.0%            | 1.11                   | 0.75 to 1.63  | 1.10                         | 0.71 to 1.71  |
| Mode of transmission                | (n=372)                          |                  | (n=427)                                |                  |                        |               |                              |               |
| MSM                                 | 120                              | 44.0%            | 153                                    | 35.8%            | <i>ref</i>             |               | <i>ref</i>                   |               |
| Heterosexual                        | 140                              | 51.3%            | 249                                    | 58.3%            | 1.39                   | 1.02 to 1.91* | 0.93                         | 0.65 to 1.33  |
| injection drug user                 | 13                               | 4.8%             | 19                                     | 4.4%             | 1.15                   | 0.54 to 2.41  | 0.47                         | 0.21 to 1.08  |
| contaminated blood transfusion      | 0                                | 0.0%             | 6                                      | 1.4%             | /                      |               | /                            |               |
| Subtype                             | (n=206)                          |                  | (n=322)                                |                  |                        |               |                              |               |
| CRF01_AE                            | 95                               | 46.1%            | 171                                    | 53.1%            | <i>ref</i>             |               | <i>ref</i>                   |               |
| B                                   | 94                               | 45.6%            | 129                                    | 40.1%            | 0.76                   | 0.53 to 1.1   | 1.35                         | 0.88 to       |



|                                             | pre-HAART<br>CD8 >800<br>(n=276) | pre-HAART<br>CD8 ≤800<br>(n=428) | Univariate<br>analysis    | adjusted by<br>pre-HAART CD4 |       |            |       |             |
|---------------------------------------------|----------------------------------|----------------------------------|---------------------------|------------------------------|-------|------------|-------|-------------|
|                                             | median/IQR/<br><u>no.</u>        | %<br><u>no.</u>                  | median/IQR/<br><u>no.</u> | %                            | OR    | 95% CI     | aOR   | 95% CI      |
|                                             |                                  |                                  |                           |                              |       |            |       | 2.06        |
| C                                           | 4                                | 1.9%                             | 4                         | 1.2%                         | 0.56  | 0.14 to    | 1.13  | 0.25 to     |
|                                             |                                  |                                  |                           |                              |       | 2.27       |       | 5.07        |
| Others                                      | 13                               | 6.3%                             | 18                        | 5.6%                         | 0.77  | 0.36 to    | 1.37  | 0.6 to 3.17 |
|                                             |                                  |                                  |                           |                              |       | 1.64       |       |             |
| Age at diagnosis<br>(yrs)                   | 36.80                            | 31.74 to                         | 37.46                     | 30.27 to                     | 1.00  | 0.98 to    | 0.99  | 0.98 to     |
|                                             |                                  | 43.54                            |                           | 45.17                        |       | 1.01       |       | 1.01        |
| Late HIV diagnosis                          | 48                               | 17.4%                            | 138                       | 32.2%                        | 2.26  | 1.56 to    | 0.98  | 0.64 to     |
|                                             |                                  |                                  |                           |                              |       | 3.28*      |       | 1.51        |
| AIDS before<br>treatment                    | 66                               | 23.9%                            | 168                       | 39.3%                        | 2.06  | 1.47 to    | 0.94  | 0.63 to     |
|                                             |                                  |                                  |                           |                              |       | 2.88*      |       | 1.41        |
| <b>(b) Pre-HAART virological status</b>     |                                  |                                  |                           |                              |       |            |       |             |
| viral load (log <sub>10</sub><br>copies/mL) | (n=274)                          |                                  | (n=420)                   |                              |       |            |       |             |
|                                             | 5.04                             | 4.55 to                          | 5.20                      | 4.69 to                      | 1.23  | 1.03-1.47* | 0.80  | 0.64-0.99*  |
|                                             |                                  | 5.52                             |                           | 5.58                         |       |            |       |             |
| Viral load log <sub>10</sub> > 145          | 52.9%                            |                                  | 259                       | 61.7%                        | 1.43  | 1.05 to    | 0.71  | 0.49 to     |
| 5                                           |                                  |                                  |                           |                              |       | 1.95*      |       | 1.02        |
| Estimated<br>cumulative viral<br>load #     | (n=96)                           |                                  | (n=101)                   |                              |       |            |       |             |
|                                             | 17.74                            | 10.00 to                         | 18.53                     | 10.88 to                     | 1.004 | 0.98 to    | 1.004 | 0.98 to     |

|                                                 | pre-HAART<br>CD8 >800<br>(n=276) | pre-HAART<br>CD8 ≤800<br>(n=428) | Univariate<br>analysis | adjusted by<br>pre-HAART CD4 |
|-------------------------------------------------|----------------------------------|----------------------------------|------------------------|------------------------------|
|                                                 | median/IQR/<br><u>no.</u> %      | median/IQR/<br><u>no.</u> %      | OR                     | 95% CI                       |
|                                                 |                                  |                                  | aOR                    | 95% CI                       |
|                                                 | 29.61                            | 27.73                            | 1.03                   | 1.03                         |
| <b>(c) Antiretroviral treatment</b>             |                                  |                                  |                        |                              |
| Months from<br>diagnosis to<br>HAART initiation | 12.80<br>3.87 to 5.60            | 5.60<br>2.44 to 30.58            | 1.00                   | 0.99 to 1.01                 |
| NNRTI-based<br>initial regimen                  | 70<br>25.4%                      | 105<br>24.5%                     | 0.96                   | 0.67 to 1.36                 |
|                                                 |                                  |                                  |                        | 1.84<br>1.22 to 2.78*        |
| <b>(d) Outcome at Year 4</b>                    |                                  |                                  |                        |                              |
| CD4 count /μL                                   | (n=246)                          | (n=370)                          |                        |                              |
|                                                 | 488<br>386 to 625                | 437<br>332 to 589                | 0.999                  | 0.998 to 1.001               |
| CD4>500/μL                                      | 117<br>47.6%                     | 141<br>38.1%                     | 0.68                   | 0.49 to 0.94*                |
| CD4/CD8 ratio                                   | (n=246)                          | (n=370)                          |                        |                              |
|                                                 | 0.49<br>0.36 to 0.68             | 0.57<br>0.41 to 0.79             | 3.61                   | 1.93 to 64.63                |
|                                                 |                                  |                                  |                        | 23.47 to 177.98*             |
| Viral load (log <sub>10</sub><br>copies/mL)     | (n=245)                          | (n=366)                          |                        |                              |
|                                                 | 1.88<br>1.88 to 2.6              | 1.88<br>1.88 to 2.6              | 1.18                   | 0.73 to 1.91                 |
| Suppressed viral                                | 245<br>100.0%                    | 364<br>99.5%                     | /                      | /                            |

|                                   | pre-HAART<br>CD8 >800<br>(n=276) |                              | pre-HAART<br>CD8 ≤800<br>(n=428) |          | Univariate<br>analysis | adjusted by<br>pre-HAART CD4 |         |  |
|-----------------------------------|----------------------------------|------------------------------|----------------------------------|----------|------------------------|------------------------------|---------|--|
|                                   | median/ IQR/ %<br><u>no.</u>     | median/ IQR/ %<br><u>no.</u> | OR                               | 95% CI   | aOR                    | 95% CI                       |         |  |
| load (≤500<br>copies/mL)          |                                  |                              |                                  |          |                        |                              |         |  |
| CD4>500/μL &<br>CD4/CD8 ratio>0.8 | (n=243)                          | (n=370)                      |                                  |          |                        |                              |         |  |
|                                   | 24                               | 9.9%                         | 59                               | 15.9%    | 1.73                   | 1.04 to                      | 5.07    |  |
|                                   |                                  |                              |                                  |          |                        | 2.87*                        | 2.74 to |  |
|                                   |                                  |                              |                                  |          |                        |                              | 9.41*   |  |
| Treatment (months)                | 83.83                            | 62.13 to                     | 85.05                            | 64.17 to | 1.000                  | 0.997 to                     | 0.999   |  |
|                                   |                                  | 117.42                       |                                  | 116.75   |                        | 1.004                        | 1.003   |  |

Note: all analyses were performed in logistic regression: simple logistic regression for univariate analyses, and multivariable logistic regression with selected confounders for multivariable analyses.

# Estimated cumulative viral load from seroconversion expressed as years\*log<sub>10</sub> viral load copies/mL

\*p<0.05

<sup>a</sup> 1 missing value; <sup>b</sup> 2 missing value

**Table 4. Multivariable logistic regression for evaluating variables associated with a) an optimal immunological outcome and b) conventional outcome**

An optimal immunological outcome was defined as achieved CD4 count  $\geq 500/\mu\text{L}$  and a CD4/CD8 ratio  $\geq 0.8$ , and conventional outcome was defined as only achieved CD4 count  $\geq 500/\mu\text{L}$  by study end-point

|                                      | a) optimal immune outcome |                 | b) conventional outcome |               |
|--------------------------------------|---------------------------|-----------------|-------------------------|---------------|
|                                      | aOR                       | 95% C.I.        | aOR                     | 95% C.I.      |
| Male gender                          | 2.23                      | 1.4 to 3.53*    | 1.81                    | 1.11 to 2.96* |
| Age at HAART initiation              | 0.98                      | 0.97 to 0.9996* | 0.96                    | 0.94 to 0.97* |
| Pre-HAART CD4 ( $\mu\text{L}$ )      |                           |                 |                         |               |
| <=100                                | <i>ref</i>                |                 | <i>ref</i>              |               |
| 101-200                              | 2.91                      | 1.83 to 4.62*   | 2.30                    | 1.57 to 3.37* |
| 201-300                              | 4.61                      | 2.53 to 8.39*   | 3.52                    | 2.1 to 5.9*   |
| >300                                 | 20.36                     | 7.51 to 55.17*  | 12.84                   | 3.6 to 45.75* |
| Months on treatment                  |                           |                 |                         |               |
| 49-72                                | <i>ref</i>                |                 | <i>ref</i>              |               |
| 73-96                                | 1.58                      | 0.93 to 2.67    | 1.67                    | 1.08 to 2.57* |
| $\geq 97$                            | 3.34                      | 2.17 to 5.15*   | 2.78                    | 1.89 to 4.09* |
| Pre-HAART CD8 $\leq 800/\mu\text{L}$ | 0.998                     | 0.998 to 0.999* |                         |               |
| Constant                             | 0.48                      |                 | 3.30                    |               |

aOR – adjusted odds ratio;

\* $p < 0.05$

## FIGURE LEGENDS

**Figure 1.** Yearly changes of (a) CD4 count, (b) CD8 count, and (c) CD4/CD8 ratio from HAART initiation to 6 years afterwards.

### Supplementary material

**Supplementary Figure 1.** Correlations between immunological markers of the study population in scattered plots with fitting line and 95% confidence interval (dotted lines): (a) pre-HAART CD8 versus pre-HAART CD4; (b) CD4 at year 4 versus pre-HAART CD4; (c) CD8 at year 4 versus pre-HAART CD4; (d) CD8 at year 4 versus CD4 at year 4; (e) CD8 at year 4 versus pre-HAART CD8; (f) CD4 at year 4 versus pre-HAART CD8.

**Supplementary Table 1.** Relationship between CD4 count and corresponding CD4/CD8 ratio at (a) baseline before initiation of highly active antiretroviral therapy (pre-HAART) and (b) outcome at the end of Year 4 following HAART

**Supplementary Table 2.** Comparison of CD4 count, CD8 count and CD4/CD8 ratio between patients achieved optimal immune outcome and conventional outcome by Year 4 in generalized estimating equations

1  
2  
3  
4  
5  
6  
7  
8  
9  
10  
11  
12  
13  
14  
15  
16  
17  
18  
19  
20  
21  
22  
23  
24  
25  
26  
27  
28  
29  
30  
31  
32  
33  
34  
35  
36  
37  
38  
39  
40  
41  
42  
43  
44  
45  
46  
47  
48  
49  
50  
51  
52  
53  
54  
55  
56  
57  
58  
59  
60



Yearly changes of (a) CD4 count, (b) CD8 count, and (c) CD4/CD8 ratio from HAART initiation to 6 years afterwards

275x397mm (300 x 300 DPI)

1  
2  
3  
4  
5  
6  
7  
8  
9  
10  
11  
12  
13  
14  
15  
16  
17  
18  
19  
20  
21  
22  
23  
24  
25  
26  
27  
28  
29  
30  
31  
32  
33  
34  
35  
36  
37  
38  
39  
40  
41  
42  
43  
44  
45  
46  
47  
48  
49  
50  
51  
52  
53  
54  
55  
56  
57  
58  
59  
60



(c) pre-HAART CD8 (cells/ $\mu$ L) vs year 4 CD8 (cells/ $\mu$ L)



(d) pre-HAART CD8 (cells/ $\mu$ L) vs pre-HAART CD4 (cells/ $\mu$ L)



(e) pre-HAART CD4 (cells/ $\mu$ L) vs year 4 CD8 (cells/ $\mu$ L)



(f) year 4 CD8 (cells/ $\mu$ L) vs year 4 CD4 (cells/ $\mu$ L)



**Supplementary Table 1.** Relationship between CD4 count and corresponding CD4/CD8 ratio at (a) baseline before initiation of highly active antiretroviral therapy (pre-HAART) and (b) outcome at the end of Year 4 following HAART

(a) Baseline (pre-HAART)

|            |                 | CD4/CD8 ratio    |                |                 |                   |
|------------|-----------------|------------------|----------------|-----------------|-------------------|
|            |                 | <0.4             | 0.4-0.79       | >=0.8           | <u>Total</u>      |
| <b>CD4</b> | <b>&lt;50</b>   | 240 (34%)        | 0 (0%)         | 0 (0%)          | <u>240 (34%)</u>  |
|            | <b>50-199</b>   | 293 (42%)        | 23 (3%)        | 0 (0%)          | <u>316 (45%)</u>  |
|            | <b>200-499</b>  | 124 (18%)        | 17 (2%)        | 1 (0.1%)        | <u>142 (20%)</u>  |
|            | <b>&gt;=500</b> | 0 (0%)           | 4 (1%)         | 2 (0.3%)        | <u>6 (1%)</u>     |
|            | <b>Total</b>    | <u>657 (93%)</u> | <u>44 (6%)</u> | <u>3 (0.4%)</u> | <u>704 (100%)</u> |

(b) Outcome at the end of Year 4

|            |                 | CD4/CD8 ratio    |                  |                  |                   |
|------------|-----------------|------------------|------------------|------------------|-------------------|
|            |                 | <0.4             | 0.4-0.79         | >=0.8            | <u>Total</u>      |
| <b>CD4</b> | <b>&lt;50</b>   | 1 (0.2%)         | 0 (0%)           | 0 (0%)           | <u>1 (0.2%)</u>   |
|            | <b>50-199</b>   | 33 (5%)          | 6 (1%)           | 0 (0%)           | <u>39 (6%)</u>    |
|            | <b>200-499</b>  | 130 (21%)        | 193 (31%)        | 36 (6%)          | <u>359 (58%)</u>  |
|            | <b>&gt;=500</b> | 24 (4%)          | 134 (22%)        | 65 (10%)         | <u>223 (36%)</u>  |
|            | <b>Total</b>    | <u>188 (30%)</u> | <u>333 (54%)</u> | <u>101 (16%)</u> | <u>622 (100%)</u> |



**Supplementary Table 2. Comparison of CD4 count, CD8 count and CD4/CD8 ratio between patients achieved optimal immune outcome and conventional outcome by Year 4 in generalized estimating equations**

| Model:                              | a. CD4 (cells/ $\mu$ L) |                   | b. CD8 (cells/ $\mu$ L) |                   | c. CD4/CD8 ratio |               |
|-------------------------------------|-------------------------|-------------------|-------------------------|-------------------|------------------|---------------|
|                                     | B                       | 95%C.I.           | B                       | 95%C.I.           | B                | 95%C.I.       |
| <b>(Intercept)</b>                  | 282.86                  | 273.99 to         | 1142.76                 | 1105.97 to        | 0.24             | 0.22 to 0.25* |
|                                     |                         | 291.74*           |                         | 1179.55*          |                  |               |
| <b>Months from HAART initiation</b> |                         |                   |                         |                   |                  |               |
| >96 months                          | 421.75                  | 400.9 to 442.59*  | -54.91                  | -95.36 to -14.47* | 0.49             | 0.46 to 0.52* |
| 84-96                               | 388.40                  | 366.41 to 410.39* | -18.28                  | -61.83 to 25.27   | 0.44             | 0.41 to 0.47* |
| 72-84                               | 375.13                  | 358.62 to 391.64* | -18.79                  | -58.14 to 20.57   | 0.41             | 0.39 to 0.43* |
| 60-72                               | 328.63                  | 314.74 to 342.52* | -50.54                  | -85.11 to -15.98* | 0.37             | 0.35 to 0.39* |
| 48-60                               | 297.14                  | 283.97 to 310.3*  | -19.01                  | -48.33 to 10.3    | 0.34             | 0.31 to 0.37* |
| 36-48                               | 267.56                  | 256.63 to 278.49* | -14.72                  | -42.71 to 13.28   | 0.28             | 0.26 to 0.3*  |
| 24-36                               | 207.20                  | 196.89 to 217.52* | 19.10                   | -7.03 to 45.24    | 0.20             | 0.19 to 0.22* |
| 12-24                               | 119.10                  | 111.79 to 126.42* | 61.80                   | 37.11 to 86.48*   | 0.10             | 0.08 to 0.12* |
| <=12 months                         | 0 <sup>a</sup>          |                   | 0 <sup>a</sup>          |                   | 0 <sup>a</sup>   |               |
| <b>Achievement by year 4</b>        |                         |                   |                         |                   |                  |               |
| optimal                             | 97.55                   | 80.71 to 114.39*  | -401.33                 | -437.93 to        | 0.41             | 0.37 to 0.45* |
| immune                              |                         |                   |                         | -364.74*          |                  |               |

1  
2  
3  
4 outcome

5  
6  
7 conventional 0<sup>a</sup> 0<sup>a</sup> 0<sup>a</sup>

8  
9  
10 outcome

11  
12  
13 (Scale) 31443 151917 0.06

---

14  
15  
16 \*p<0.05

17 optimal immune outcome – achievement of CD4≥500/μL and CD4/CD8 ratio ≥0.8 by  
18 Year 4;

19 conventional outcome – achievement of only CD4≥500/μL by Year 4;

20  
21  
22  
23  
24  
25  
26  
27  
28  
29  
30  
31  
32  
33  
34  
35  
36  
37  
38  
39  
40  
41  
42  
43  
44  
45  
46  
47  
48  
49  
50  
51  
52  
53  
54  
55  
56  
57  
58  
59  
60

STROBE 2007 (v4) Statement—Checklist of items that should be included in reports of *cohort studies*

| Section/Topic                | Item # | Recommendation                                                                                                                                                                       | Reported on page # |
|------------------------------|--------|--------------------------------------------------------------------------------------------------------------------------------------------------------------------------------------|--------------------|
| Title and abstract           | 1      | (a) Indicate the study's design with a commonly used term in the title or the abstract                                                                                               | 1                  |
|                              |        | (b) Provide in the abstract an informative and balanced summary of what was done and what was found                                                                                  | 3                  |
| <b>Introduction</b>          |        |                                                                                                                                                                                      |                    |
| Background/rationale         | 2      | Explain the scientific background and rationale for the investigation being reported                                                                                                 | 5-6                |
| Objectives                   | 3      | State specific objectives, including any prespecified hypotheses                                                                                                                     | 6                  |
| <b>Methods</b>               |        |                                                                                                                                                                                      |                    |
| Study design                 | 4      | Present key elements of study design early in the paper                                                                                                                              | 6                  |
| Setting                      | 5      | Describe the setting, locations, and relevant dates, including periods of recruitment, exposure, follow-up, and data collection                                                      | 7                  |
| Participants                 | 6      | (a) Give the eligibility criteria, and the sources and methods of selection of participants. Describe methods of follow-up                                                           | 7                  |
|                              |        | (b) For matched studies, give matching criteria and number of exposed and unexposed                                                                                                  | NA                 |
| Variables                    | 7      | Clearly define all outcomes, exposures, predictors, potential confounders, and effect modifiers. Give diagnostic criteria, if applicable                                             | 7-8                |
| Data sources/<br>measurement | 8*     | For each variable of interest, give sources of data and details of methods of assessment (measurement). Describe comparability of assessment methods if there is more than one group | 7                  |
| Bias                         | 9      | Describe any efforts to address potential sources of bias                                                                                                                            | 14-15              |
| Study size                   | 10     | Explain how the study size was arrived at                                                                                                                                            | NA                 |
| Quantitative variables       | 11     | Explain how quantitative variables were handled in the analyses. If applicable, describe which groupings were chosen and why                                                         | 8                  |
| Statistical methods          | 12     | (a) Describe all statistical methods, including those used to control for confounding                                                                                                | 7-8                |
|                              |        | (b) Describe any methods used to examine subgroups and interactions                                                                                                                  | NA                 |
|                              |        | (c) Explain how missing data were addressed                                                                                                                                          | 8                  |
|                              |        | (d) If applicable, explain how loss to follow-up was addressed                                                                                                                       | NA                 |
|                              |        | (e) Describe any sensitivity analyses                                                                                                                                                | NA                 |
| <b>Results</b>               |        |                                                                                                                                                                                      |                    |

|                          |     |                                                                                                                                                                                                              |           |
|--------------------------|-----|--------------------------------------------------------------------------------------------------------------------------------------------------------------------------------------------------------------|-----------|
| Participants             | 13* | (a) Report numbers of individuals at each stage of study—eg numbers potentially eligible, examined for eligibility, confirmed eligible, included in the study, completing follow-up, and analysed            | 8         |
|                          |     | (b) Give reasons for non-participation at each stage                                                                                                                                                         | NA        |
|                          |     | (c) Consider use of a flow diagram                                                                                                                                                                           | NA        |
| Descriptive data         | 14* | (a) Give characteristics of study participants (eg demographic, clinical, social) and information on exposures and potential confounders                                                                     | 9         |
|                          |     | (b) Indicate number of participants with missing data for each variable of interest                                                                                                                          | Table 1,2 |
|                          |     | (c) Summarise follow-up time (eg, average and total amount)                                                                                                                                                  | 9         |
| Outcome data             | 15* | Report numbers of outcome events or summary measures over time                                                                                                                                               | Table 3   |
| Main results             | 16  | (a) Give unadjusted estimates and, if applicable, confounder-adjusted estimates and their precision (eg, 95% confidence interval). Make clear which confounders were adjusted for and why they were included | Table 2   |
|                          |     | (b) Report category boundaries when continuous variables were categorized                                                                                                                                    | Table 1,2 |
|                          |     | (c) If relevant, consider translating estimates of relative risk into absolute risk for a meaningful time period                                                                                             | NA        |
| Other analyses           | 17  | Report other analyses done—eg analyses of subgroups and interactions, and sensitivity analyses                                                                                                               | NA        |
| <b>Discussion</b>        |     |                                                                                                                                                                                                              |           |
| Key results              | 18  | Summarise key results with reference to study objectives                                                                                                                                                     | 12        |
| <b>Limitations</b>       |     |                                                                                                                                                                                                              |           |
| Interpretation           | 20  | Give a cautious overall interpretation of results considering objectives, limitations, multiplicity of analyses, results from similar studies, and other relevant evidence                                   | 14-15     |
| Generalisability         | 21  | Discuss the generalisability (external validity) of the study results                                                                                                                                        | 15-16     |
| <b>Other information</b> |     |                                                                                                                                                                                                              |           |
| Funding                  | 22  | Give the source of funding and the role of the funders for the present study and, if applicable, for the original study on which the present article is based                                                | 17        |

\*Give information separately for cases and controls in case-control studies and, if applicable, for exposed and unexposed groups in cohort and cross-sectional studies.

**Note:** An Explanation and Elaboration article discusses each checklist item and gives methodological background and published examples of transparent reporting. The STROBE checklist is best used in conjunction with this article (freely available on the Web sites of PLoS Medicine at <http://www.plosmedicine.org/>, Annals of Internal Medicine at <http://www.annals.org/>, and Epidemiology at <http://www.epidem.com/>). Information on the STROBE Initiative is available at [www.strobe-statement.org](http://www.strobe-statement.org).

# BMJ Open

## Combining CD4 recovery and CD4/CD8 ratio restoration as an indicator for evaluating the outcome of continued antiretroviral therapy: an observational cohort study

|                                 |                                                                                                                                                                                                                                                                                                                                                                                                                                                                                                                                                                                            |
|---------------------------------|--------------------------------------------------------------------------------------------------------------------------------------------------------------------------------------------------------------------------------------------------------------------------------------------------------------------------------------------------------------------------------------------------------------------------------------------------------------------------------------------------------------------------------------------------------------------------------------------|
| Journal:                        | <i>BMJ Open</i>                                                                                                                                                                                                                                                                                                                                                                                                                                                                                                                                                                            |
| Manuscript ID                   | bmjopen-2017-016886.R2                                                                                                                                                                                                                                                                                                                                                                                                                                                                                                                                                                     |
| Article Type:                   | Research                                                                                                                                                                                                                                                                                                                                                                                                                                                                                                                                                                                   |
| Date Submitted by the Author:   | 06-Jul-2017                                                                                                                                                                                                                                                                                                                                                                                                                                                                                                                                                                                |
| Complete List of Authors:       | Lee, Shui Shan; The Chinese University of Hong Kong, Stanley Ho Centre for Emerging Infectious Diseases<br>Wong, Ngai Sze; The Chinese University of Hong Kong, Stanley Ho Centre for Emerging Infectious Diseases<br>Wong, Bonnie; Department of Health, Hong Kong Special Administrative Region Government, Special Preventive Programme<br>Wong, Ka Hing; Department of Health, Hong Kong Special Administrative Region Government, Special Preventive Programme<br>Chan, Kenny; Department of Health, Hong Kong Special Administrative Region Government, Special Preventive Programme |
| <b>Primary Subject Heading</b>: | HIV/AIDS                                                                                                                                                                                                                                                                                                                                                                                                                                                                                                                                                                                   |
| Secondary Subject Heading:      | Immunology (including allergy), Infectious diseases                                                                                                                                                                                                                                                                                                                                                                                                                                                                                                                                        |
| Keywords:                       | antiretroviral therapy, CD4, CD8, CD4/CD8 ratio, immune outcome                                                                                                                                                                                                                                                                                                                                                                                                                                                                                                                            |
|                                 |                                                                                                                                                                                                                                                                                                                                                                                                                                                                                                                                                                                            |

SCHOLARONE™  
Manuscripts

only

1  
2  
3 **Combining CD4 recovery and CD4/CD8 ratio restoration as an indicator for**  
4 **evaluating the outcome of continued antiretroviral therapy: an observational**  
5 **cohort study**  
6  
7  
8

9 **Running title:** Immune outcome following antiretroviral therapy  
10  
11

12  
13  
14 Shui Shan Lee<sup>1</sup>, Ngai Sze Wong<sup>1,2\*</sup>, Bonnie Chun Kwan Wong<sup>3</sup>, Ka Hing Wong<sup>3</sup>,  
15  
16 Kenny Chi Wai Chan<sup>3</sup>  
17  
18

19  
20  
21 <sup>1</sup>Stanley Ho Centre for Emerging Infectious Diseases, The Chinese University of  
22  
23 Hong Kong, Hong Kong, People's Republic of China;  
24

25 <sup>2</sup>Institute for Global Health & Infectious Diseases, University of North Carolina at  
26  
27 Chapel Hill, Chapel Hill, United States;  
28

29 <sup>3</sup>Special Preventive Programme, Centre for Health Protection, Department of Health,  
30  
31 Hong Kong Special Administrative Region Government, Hong Kong, People's  
32  
33 Republic of China;  
34  
35

36  
37  
38 **\*Corresponding author**  
39

40 Dr. Ngai Sze Wong  
41

42 Stanley Ho Centre for Infectious Diseases  
43

44 Postgraduate Education Centre  
45

46 Prince of Wales Hospital  
47

48 Shatin  
49

50 Hong Kong  
51

52 Tel: (852) 22528813  
53

54 Fax: (852) 26354977  
55  
56  
57  
58  
59  
60

1  
2  
3 Email: [candy\\_wong@cuhk.edu.hk](mailto:candy_wong@cuhk.edu.hk)  
4

5 **Keywords:** antiretroviral therapy; CD4; CD8; CD4/CD8 ratio; immune outcome  
6  
7

8  
9 **Word Count:**  
10

11 **Abstract:** 239 words; **Main text:** 3278 words  
12  
13  
14  
15  
16  
17  
18  
19  
20  
21  
22  
23  
24  
25  
26  
27  
28  
29  
30  
31  
32  
33  
34  
35  
36  
37  
38  
39  
40  
41  
42  
43  
44  
45  
46  
47  
48  
49  
50  
51  
52  
53  
54  
55  
56  
57  
58  
59  
60

For peer review only

**ABSTRACT**

**Objectives.** Immune recovery following highly active antiretroviral therapy (HAART) is commonly assessed by the degree of CD4 reconstitution alone. In this study, we aimed to assess immune recovery by incorporating both CD4 count and CD4/CD8 ratio.

**Design:** Observational cohort study

**Setting and participants.** Clinical data from Chinese HIV+ patients attending the largest HIV service in Hong Kong and who had been on HAART for  $\geq 4$  years were accessed.

**Main outcome measures.** Optimal immune outcome was defined as a combination of a CD4 count  $\geq 500/\mu\text{L}$  and a CD4/CD8 ratio  $\geq 0.8$ .

**Results.** A total of 718 patients were included for analysis (6353 person-years). At the end of Year 4, 318 out of 715 patients achieved CD4  $\geq 500/\mu\text{L}$ , of which only 33% (105 out of 318) concurrently achieved CD4/CD8 ratio  $\geq 0.8$ . Patients with a pre-HAART CD8  $\leq 800/\mu\text{L}$  (428 out of 704) were more likely to be optimal immune outcome achievers with CD4  $\geq 500/\mu\text{L}$  and CD4/CD8 ratio  $\geq 0.8$ , the association of which was stronger after adjusting for pre-HAART CD4 counts. In a multivariable logistic model, optimal immune outcome was positively associated with male gender, younger pre-HAART age and higher pre-HAART CD4 count, longer duration of HAART and pre-HAART CD8  $\leq 800/\mu\text{L}$ . Treatment regimen and cumulative viral loads played no significant role in the pattern of immune recovery.

**Conclusions.** A combination of CD4 count and CD4/CD8 ratio could be a useful approach for the characterisation of treatment outcome over time, on top of monitoring CD4 count alone.



**Strengths and limitations of this study**

- The combined use of CD4 and CD4/CD8 ratio as an outcome measure offers a new perspective for measuring immune recovery following antiretroviral therapy.
- The combined marker could avoid overestimation of treatment performance in patients with CD4 count but low CD4/CD8 ratio.
- The study was limited by not having included clinical events in the analysis, a gap which should be filled in larger scale cohort studies.

## INTRODUCTION

Highly active antiretroviral therapy (HAART) forms the cornerstone of modern day treatment of human immunodeficiency virus (HIV) infection. In monitoring treatment outcome, peripheral blood CD4+ lymphocyte (hereafter referred as CD4) count measurement is widely used, the results of which feature a rapid rise in the first 3-6 months followed by a second phase of gradual increase, plateauing 4 to 6 years afterwards.<sup>1</sup> Nadir CD4 counts and advanced age are associated with poorer CD4 recovery, a well-reported phenomenon that has been reviewed in the literature.<sup>1,2</sup>

While high and persistently elevated CD8+ lymphocytes (hereafter referred as CD8) is commonly observed in chronically infected HIV patients, relatively little attention has been paid to its impact on immunological recovery.<sup>3</sup> A large cohort study suggested that markedly elevated CD8 count at HAART initiation was associated with a poor increase in CD4 count.<sup>4</sup> Host factors aside, virus burden exerted by HIV could also impact immunological recovery. In the absence of timely and effective HAART, HIV cumulate over time leading to a state of cumulative viraemia, a predictor of suboptimal immunological outcome in primary HIV infection.<sup>5</sup> Separate studies have shown that high cumulative viral load was a potential marker for progression to acquired immune deficiency syndrome (AIDS) in chronic HIV infection.<sup>6</sup> Despite effective therapy, some 20-30% of patients were unable to achieve optimal immunological recovery,<sup>1,7</sup> an outcome resulting from the interaction of a good range of host and viral factors, as well as co-infection with other pathogens, notably hepatitis C virus.<sup>3</sup>

Over the last decade, a CD4-guided approach to treatment initiation has gradually

1  
2  
3 been replaced by early initiation of HAART irrespective of baseline CD4 level.<sup>8</sup>  
4  
5 Achievement of a high CD4 count of, say, over 500/ $\mu$ L remains a commonly used  
6  
7 marker of immune restoration. Knowingly, prompt treatment and full viral  
8  
9 suppression do not imply freedom from co-morbidities, as HIV disease is also  
10  
11 characterised by a state of immune activation, with the emergence of non-AIDS  
12  
13 morbidity and mortality.<sup>9</sup> This morbid state of immune activation cannot be inferred  
14  
15 from the pattern of CD4 recovery alone. Failure of CD4/CD8 normalisation following  
16  
17 HAART has however been linked to this scenario of immune activation.<sup>10 11</sup> Low  
18  
19 CD4/CD8 ratio was observed in patients despite high CD4 level (>500/ $\mu$ L).<sup>12</sup> A high  
20  
21 CD8 count following HAART was shown to be associated with inflammatory  
22  
23 non-AIDS-related clinical events, and in fact a higher risk of myocardial infarction  
24  
25 has been reported.<sup>4 13</sup> Apparently, a target CD4 count is inadequate for reflecting  
26  
27 effective immune recovery. Concurrent rise of the CD4/CD8 ratio is increasingly  
28  
29 recognized as an important marker of immune reconstitution.<sup>10 14</sup>  
30  
31  
32  
33  
34  
35

36 To better monitor immunological recovery following HAART, new biomarkers are  
37  
38 needed, which should preferably be derived from routinely collected laboratory data.  
39  
40 Optimal outcome could be founded on CD4/CD8 normalization on top of the  
41  
42 regularly monitored CD4 count. In this study, we define HAART associated immune  
43  
44 recovery by a combination of CD4 outcome and CD4/CD8 restoration. We set out to  
45  
46 examine its predictors by analysing regularly collected viral load and immunological  
47  
48 data, the latter including CD8 count, in a cohort of HIV patients following HAART.  
49  
50  
51  
52  
53  
54  
55

## 56 **METHODS**

57  
58  
59  
60

1  
2  
3  
4  
5 Anonymous clinical data from Integrated Treatment Centre, the largest HIV clinical  
6 service in Hong Kong were accessed for this observational study. Data access  
7 approval was granted by Department of Health, Hong Kong Special Administrative  
8 Region Government in compliance with the Personal Data (Privacy) Ordinance.  
9  
10 Individual consent for the study was waived following approval of the Joint Chinese  
11 University of Hong Kong – New Territories East Cluster Clinical Research Ethics  
12 Committee (CREC). HIV patients of age  $\geq 18$  diagnosed in 1985-2012, on HAART  
13 continuously for  $\geq 4$  years without treatment interruption, with at least 1 CD4  
14 measurement during treatment and with viral load fully suppressed (without  
15 consecutive viral load  $> 500$  copies/mL in the first 4 years on treatment) were selected.  
16  
17 We included patients who were treatment naïve or have been on non-standard  
18 treatment for  $< 1$  year before HAART initiation. Data retrieved were: (a) CD4 and  
19 CD8 counts at diagnosis, before HAART initiation and 3-4 monthly subsequently, (b)  
20 viral load levels at the respective time-points, (c) AIDS diagnosis and the timing, as  
21 appropriate, (d) antiretroviral treatment date and regimens, differentiated as protease  
22 inhibitor (PI) or non-nucleoside reverse transcriptase inhibitor (NNRTI) based as  
23 other regimens were rarely used for treatment naïve patients  
24  
25  
26  
27  
28  
29  
30  
31  
32  
33  
34  
35  
36  
37  
38  
39  
40  
41  
42  
43  
44

45 Estimated cumulative viral load was expressed as  $\text{years} * \log_{10} \text{copies/mL}$ , in  
46 accordance with the method reported by Zoufaly et al.<sup>15</sup> with modifications. Patients  
47 with available negative HIV testing result within 3 years before HIV diagnosis were  
48 included, so that one's seroconversion date could be estimated with confidence.<sup>16</sup> In  
49 brief, the products of the  $\log_{10}$  viral load were summed from estimated seroconversion  
50 to subsequent specified time-point(s), with the computation of the highest viral load  
51  
52  
53  
54  
55  
56  
57  
58  
59  
60

1  
2  
3 for the undiagnosed interval and an upward adjustment by  $1 \log_{10}$  for the presumed  
4 primary infection period. The time of seroconversion was determined as the mid-point  
5 between last negative and first positive HIV antibody testing dates. On the other hand,  
6 optimal immune outcome was defined as the achievement of a CD4 count of  $\geq 500/\mu\text{L}$   
7 and a CD4/CD8 ratio  $\geq 0.8$ <sup>17</sup> while conventional outcome was defined as achieving  
8 CD4 count of  $\geq 500/\mu\text{L}$  but not CD4/CD8 ratio  $\geq 0.8$  within specific time. Late HIV  
9 diagnosis was defined as the diagnosis of AIDS within 3 months of HIV diagnosis.  
10 The latest CD4 and CD8 measurements  $\leq 30$  days before HAART initiation were used  
11 as the baseline.  
12  
13  
14  
15  
16  
17  
18  
19  
20  
21  
22  
23  
24

25 Comparisons between pre-HAART CD8  $> 800/\mu\text{L}$  vs  $\leq 800/\mu\text{L}$  were made by odds ratio  
26 (OR) and multivariable logistic regression with pre-HAART CD4 as confounder,  
27 while correlation coefficients were calculated to test the associations between CD4  
28 and CD8 before and 4 years after HAART. The CD8 threshold was adopted by taking  
29 reference from the criteria of high CD8 count (i.e. over  $800/\mu\text{L}$ ) during primary  
30 infection reported in another study.<sup>18</sup> CD4 (maximum value), CD8 (minimum value)  
31 and CD4/CD8 ratio (maximum value) of patients achieving optimal immune outcome  
32 and conventional outcome by Year 4 on HAART over time ( $\leq 12$  months, 12.1-24  
33 months, ... ,  $> 96$  months) were compared in generalized estimating equations (GEE).  
34 Multivariable logistic regression model (stepwise) was applied to examine the  
35 predictors of optimal immune outcome and conventional outcome. Complete case  
36 analysis was performed. Loss to follow-up and death were data end points. Statistical  
37 tests were performed in SPSS.  
38  
39  
40  
41  
42  
43  
44  
45  
46  
47  
48  
49  
50  
51  
52  
53  
54  
55  
56  
57  
58  
59  
60

## RESULTS

As of the end of 2012, data of 2974 diagnosed adults were accessed. Of these, 718 eligible treatment-naïve diagnosed cases who had been on HAART continuously for  $\geq 4$  years were included in the study. Their case records contained 18857 clinical measurements (18693 CD4, 18521 CD8 and/or 17776 viral load measurements) at multiple time points spanning over 6353 person-years' follow-up. General characteristics of the study population are displayed in Table 1. Overall, a majority (84%) were male with a median age at diagnosis of 37 years (interquartile range (IQR): 31 – 45 years). The median interval from diagnosis to the latest assessment was 100 months (IQR= 74-141 months). Most were infected by either HIV-1 subtype B (31%) or CRF01\_AE (38%), with men who have sex with men (MSM) accounting for 39% of the study population. The pre-HAART median CD4 and CD8 counts were 109/ $\mu\text{L}$  and 673/ $\mu\text{L}$  respectively, which were positively correlated (Pearson correlation coefficient  $r = 0.50$ ,  $p < 0.001$ ) (See web-only Supplementary Figure 1(d)). The distribution of CD4 and CD4/CD8 ratio at baseline before initiation of HAART is shown in Supplementary Table 1(a). The life-time estimated cumulative viral load at the last assessment increased with the interval between seroconversion and HAART initiation ( $r = 0.94$ ,  $p < 0.001$ ).

During the study period, a CD4-guided approach was in place, implying that HAART was recommended when one's CD4 count fell below 350/ $\mu\text{L}$ . A majority of the patients (74%) had been started on a PI-based with 25% on NNRTI-based regimen, and 1 % had been started on non-standard regimen subsequently changed to HAART within 1 year. Integrase Inhibitors (INSTI) had not been used as a component of one's

1  
2  
3 first regimen, but 3 patients had changed to raltegravir-based regimen  
4  
5 afterwards.(Table 1). The median treatment duration was 85.38 months (IQR: 63.39 to  
6  
7 117.32). As of the end of a 4-year observation period, the CD4 count of 318 patients  
8  
9 (44%) had reached 500/ $\mu$ L or above, of which 105 (33%) gave a CD4/CD8 ratio of  
10  
11  $\geq 0.8$  concurrently, while 205 (64%) patients reached the CD4 target but not the ratio.  
12  
13 On the other hand, 145 patients reached the optimal ratio, of which 32 (22%) patients  
14  
15 could not reach the CD4 target. (Table 2) The temporal changes of CD4 count, CD8  
16  
17 count and CD4/CD8 ratio over time is shown in figure 1, while distribution of CD4  
18  
19 and CD4/CD8 ratio at the end of Year 4 is shown in Supplementary Table 1(b).  
20  
21 Whereas both CD4 count (figure 1(a)) and CD4/CD8 ratio (figure 1(e)) showed a  
22  
23 steady rise from the first time-point following HAART, the temporal pattern of CD8  
24  
25 counts was inconspicuous (figure 1(c)). Patients with optimal immune outcome had  
26  
27 significantly higher median CD4 and CD4/CD8 ratio but lower CD8 count than those  
28  
29 only with satisfactory CD4 recovery (conventional outcome) in all time points (GEE  
30  
31 model results in Supplementary Table 2). The CD4 count at Year 4 was positively  
32  
33 correlated with pre-HAART CD4 ( $r = 0.38$ ,  $p < 0.001$ )(See web-only Supplementary  
34  
35 Figure 1(a)) Categorised by one's pre-HAART CD8 count, about half ( $n = 428$ , 61%)  
36  
37 had a lower count of  $\leq 800/\mu$ L. The 2 groups had similar demographic, cumulative  
38  
39 viral load levels and had received similar treatment regimens. The CD4 count at Year  
40  
41 4 was positively correlated with pre-HAART CD8 count ( $r = 0.18$ ,  $p < 0.001$ ) (See  
42  
43 web-only Supplementary Figure 1(b)) whereas the latter was also positively correlated  
44  
45 with CD8 at Year 4. ( $r = 0.35$ ,  $p < 0.001$ ) (See web-only Supplementary Figure 1(c)).  
46  
47 After adjusting for pre-HAART CD4, patients with lower pre-HAART CD8 had  
48  
49 higher chance of achieving a higher CD4/CD8 ratio at Year 4 (adjusted OR  
50  
51 (aOR)=64.63, 95% C.I.=23.47 to 177.98) (Table 3). Likewise, a low pre-HAART CD8  
52  
53  
54  
55  
56  
57  
58  
59  
60

1  
2  
3 count of  $\leq 800/\mu\text{L}$  was associated with the optimal immune outcome at Year 4, with an  
4 increased odds (aOR=5.07, 95%C.I.=2.74-9.41) after adjusting for pre-HAART CD4.  
5  
6  
7 There was no significant correlation between Year 4 CD8 and pre-HAART CD4 (See  
8 web-only Supplementary Figure 1(e)), but positive association between CD4 and CD8  
9  
10 web-only Supplementary Figure 1(e)), but positive association between CD4 and CD8  
11 at Year 4 ( $r=0.33$ ,  $p<0.001$ ) could be demonstrated (See web-only Supplementary  
12 Figure 1(f)).  
13  
14  
15  
16  
17  
18  
19

20 The following independent variables were then tested for their prediction of optimal  
21 immune outcome and conventional outcome achieved since treatment initiation  
22 throughout the observation period: pre-HAART CD4, pre-HAART CD8, pre-HAART  
23 age, treatment duration and male gender. In the final model, both high pre-HAART  
24 CD4 and low pre-HAART CD8 were significant predictors of optimal immune  
25 outcome, while only the former was a significant predictor of conventional outcome  
26 (Table 4). Patients who were male and started HAART at younger age were more  
27 likely to achieve both outcomes. Patients on treatment for longer time ( $\geq 97$ months)  
28 had higher odds to achieve optimal immune outcome (aOR=3.34, 95%C.I.=2.17 to  
29 5.15, 49-72 months as reference) than conventional outcome (aOR=2.78,  
30 95%C.I.=1.89 to 4.09, 49-72 months as reference). As a sub-study (results not shown),  
31 we have performed another set of GEE models with cumulative viral load as an  
32 independent variable (results not shown). The results did not support it as a significant  
33 predictor of an optimal immune outcome both in CD4 count and CD4/CD8 ratio,  
34 though the number of patients eligible for the analyses was only 187.  
35  
36  
37  
38  
39  
40  
41  
42  
43  
44  
45  
46  
47  
48  
49  
50  
51  
52  
53  
54  
55

## 56 DISCUSSION

57  
58  
59  
60



1  
2  
3  
4  
5 Pre-HAART CD4 count has long been shown to be a predictor of immunological  
6  
7 outcome 3-5 years following antiretroviral therapy.<sup>1</sup> Our previous longitudinal studies  
8  
9 in a cohort of Chinese HIV patients have demonstrated positive associations between  
10  
11 nidus and maximum CD4 count over 5 years irrespective of the causative virus  
12  
13 subtype or the regimens prescribed.<sup>19 20</sup> In assessing antiretroviral treatment response,  
14  
15 however, CD4 count alone appeared to add little to viral load monitoring.<sup>21</sup> To  
16  
17 account for the potential risk of non-AIDS related comorbidities including metabolic  
18  
19 complications,<sup>9</sup> parallel CD4/CD8 ratio testing is gaining popularity as it reflects also  
20  
21 the intensity of chronic inflammation implicated.<sup>9 10</sup> In this study, a CD4 count  
22  
23  $\geq 500/\mu\text{L}$  in conjunction with a ratio of  $\geq 0.8$  was examined as a target outcome  
24  
25 indicator for chronically infected patients on continued antiretroviral therapy. This  
26  
27 target was achieved in 15% (105 out of 715) of our patients at the end of a 4-year  
28  
29 treatment period. The association of pre-HAART CD8 with optimal immune outcome  
30  
31 was stronger with a cut-off ratio of  $\geq 1$  but the proportion of patients achieving the  
32  
33 target outcome would be very low at 6% (46 out of 718). Both pre-HAART CD4 and  
34  
35 CD8 count, as well as the treatment interval were independent predictors of this new  
36  
37 outcome target. While CD4 remained a useful prognostic marker, using it as the sole  
38  
39 marker might overestimate treatment performance by including patients with high  
40  
41 CD4 count but high CD8 count and low CD4/CD8 ratio as achiever (205 out of 715  
42  
43 achieved CD4 target only).  
44  
45  
46  
47  
48  
49  
50  
51

52 In this study, we have shown that 44% of patients on HAART achieved a CD4 count  
53  
54  $\geq 500/\mu\text{L}$  at the end of 4 years, an outcome slightly poorer than that of 59% reported  
55  
56 by the Swiss HIV Cohort Study, a discrepancy which could be attributed to our  
57  
58  
59  
60

1  
2  
3 shorter observation period (4 instead of 5 years) and the lower median pre-HAART  
4 CD4 count (158/ $\mu$ L compared to 180/ $\mu$ L).<sup>22</sup> As concluded in the recently published  
5 “START” study examining the benefits of the initiation of antiretroviral therapy in  
6 HIV-positive adults with a CD4 count  $>500/\mu$ L, CD4 count *per se* could not capture  
7 all outcome effects arising from immediate HAART in chronic HIV infection.<sup>23</sup> Our  
8 study confirmed that CD4/CD8 ratio could be a readily available supplementary  
9 marker to monitor immune recovery. Evidently, the ratio may vary with lengths of  
10 observations, demographics, and/or even HAART regimens.<sup>17 24 25</sup> As the CD4/CD8  
11 ratio tended to rise more slowly than CD4 recovery, we have chosen an interim ratio  
12 of 0.8<sup>17</sup> to assess the state of immune recovery at 4 years after HAART initiation.  
13  
14 Normalisation to a ratio of 1 could in fact be demonstrated in 13% of patients within 7  
15 years, the median observation interval of our cohort.

16  
17  
18  
19  
20  
21  
22  
23  
24  
25  
26  
27  
28  
29  
30  
31  
32 Pre-HAART CD8 count and its normalisation following antiretroviral treatment is  
33 relatively under-investigated.<sup>26 27</sup> In our study, pre-HAART CD4 and pre-HAART  
34 CD8 counts were positively correlated. It was noted that heterosexuals gave a lower  
35 pre-HAART CD8 (Table 3) compared to MSM but the difference became insignificant  
36 after the adjustment of pre-HAART CD4. Over time, CD4 rise went in parallel with  
37 slowly falling CD8 until reaching an optimal CD4 level of  $\geq 500/\mu$ L with a  
38 near-normalised CD4/CD8 ratio  $\geq 0.8$  at Year 4. Pre-HAART CD8 was a significant  
39 predictor of optimal immune outcome but not conventional outcome. The median  
40 CD8 count of former group was lower than latter group of patients in all time points  
41 since HAART initiation. Significant expansion of CD8 is known to occur soon after  
42 infection and the phenomenon might persist throughout the course of HIV infection.  
43  
44 Recent studies suggested that CD8 normalisation was associated with early initiation

1  
2  
3 of HAART during acute infection.<sup>18</sup> HIV-specific CD8 has been proposed to play an  
4  
5 important role in effecting functional cure of HIV infection.<sup>28</sup> Its relationship with the  
6  
7 absolute count of CD8 before and after HAART has not been established. With the  
8  
9 growing evidence of the role of CD4/CD8 ratio as a new biomarker for non-AIDS  
10  
11 morbidity and chronic inflammation,<sup>9 10 29 30</sup> it is possible that HIV+ patients' clinical  
12  
13 outcome could be better explained from both the ratio and CD4 count rather than from  
14  
15 the latter alone. From a virological perspective, the estimated cumulative viral load  
16  
17 can be viewed as a surrogate of prolonged non-suppression of virus load. It does not  
18  
19 however independently predict CD4 or CD4/CD8 ratio outcomes. Apparently, its  
20  
21 immunological impacts could be overtaken by a long interval of HAART, if the  
22  
23 pre-HAART CD4 and CD8 status were optimal. Overall, our results lent support to  
24  
25 early initiation of HAART in chronic HIV infection to avoid temporal accumulation  
26  
27 of virus, a conclusion similar to that for primary HIV infection.<sup>5</sup>  
28  
29  
30  
31  
32  
33

34 We acknowledge that our study carries a number of limitations. Foremost, all patients  
35  
36 had been on HAART during the time when a CD4-guided approach to treatment  
37  
38 initiation was enforced. As the patients had been started on either a PI-based or  
39  
40 NNRTI-based regimen, the possible impacts of newer generations of antiretroviral  
41  
42 like INSTI could not be ascertained. The results should therefore be interpreted with  
43  
44 caution, especially that strong association between INSTI-based regimen and  
45  
46 CD4/CD8 normalisation has recently been reported.<sup>31</sup> These were selection bias  
47  
48 which might have limited the extrapolation of results to the entire HIV population. In  
49  
50 addition, our dataset did not include other inflammatory or infectious outcomes (e.g.  
51  
52 HCV and/or cytomegalovirus co-infections<sup>32-35</sup>) and therefore these could not be  
53  
54 analysed in perspective. As the main comparative period was 4 years, the minimum  
55  
56  
57  
58  
59  
60

1  
2  
3 treatment duration of study population, the immunological recovery achieved by  
4 patients in this study may not necessarily be reflecting the ultimate response to  
5 HAART. We have nevertheless evaluated the outcome (comprising both CD4 count  
6 and CD4/CD8 ratio) of all enrolled patients with a median duration of treatment of  
7 over 6 years in the final analysis. Theoretically, cohorts with patients observed  
8 throughout their lifetime would be invaluable to determine the health benefits of  
9 HAART. Analyses from such life-long cohorts should become a reality in the coming  
10 years or decades.  
11  
12  
13  
14  
15  
16  
17  
18  
19  
20  
21  
22  
23  
24

## 25 CONCLUSIONS

26  
27  
28  
29 Conventionally, CD4 count has been commonly used as the main outcome marker  
30 following HAART. In light of the increasing incidence of co-morbidities associated  
31 with HIV related chronic inflammations, CD4 count per se appears to carry little  
32 prognostic value in predicting HAART-associated immune recovery. Our results  
33 suggested that a combination of CD4 count and CD4/CD8 ratio offers another  
34 potentially useful approach to assessing immune outcome, compared to the use of  
35 CD4 alone. In evaluating immune recovery following long-term HIV viral  
36 suppression, pre-HAART CD8 count could be as important as CD4 count as the  
37 independent predictors of the ultimate immune outcome. As both CD4 and CD8 are  
38 often routinely collected in the course of HIV management, an assessment of the  
39 temporal trends of CD4, CD8 and CD4/CD8 ratio could conveniently predict the  
40 immunological outcome without the need for sophisticated immune markers.  
41  
42  
43  
44  
45  
46  
47  
48  
49  
50  
51  
52  
53  
54

55  
56 Virological impact, as inferred from the estimated cumulative viral load after infection,  
57  
58  
59  
60

1  
2  
3 does not however add to the outcome reflected from viral load suppression. The  
4  
5 monitoring of the host immunological responses remains the most important approach  
6  
7 in assessing treatment outcome following HAART.  
8  
9

### 14 **Acknowledgements**

15  
16 The authors thank all staff of the Integrated Treatment Centre for their contribution to  
17  
18 the delivery of quality clinical care to patients whose data were accessed for use in the  
19  
20 analyses described in the manuscript. Li Ka Shing Institute for Health Sciences at The  
21  
22 Chinese University of Hong Kong is acknowledged for technical support in  
23  
24 developing the analyses. NS was supported by Guangdong Provincial Centers for  
25  
26 Skin Diseases and STI Control, the UNC-South China STD Research Training Center  
27  
28 (FIC1D43TW009532-01) and NIH Fogarty International Center.  
29  
30  
31  
32  
33

### 34 **Contributors**

35  
36 SSL motivated and designed the study. KHW, BCKW, KCWC contributed the data  
37  
38 and their interpretation. NSW analysed the data. SSL wrote the article. All authors  
39  
40 contributed to interpretation of results and critically reviewed and edited the article.  
41  
42  
43  
44

### 45 **Funding**

46  
47 The study was supported by Health and Medical Research Fund (Project code:  
48  
49 CU-15-A15) of the Food and Health Bureau, Hong Kong Special Administrative  
50  
51 Region Government. The funder did not have any role in study design, analysis and  
52  
53 interpretation of data and drafting the manuscript.  
54  
55  
56  
57  
58  
59  
60

**Competing interests**

The authors declare that there is no conflict of interest.

**Ethics approval**

Data access approval was granted by Department of Health, Hong Kong Special Administrative Region Government in compliance with the Personal Data (Privacy) Ordinance. Individual consent for the study was waived following approval of the Joint Chinese University of Hong Kong – New Territories East Cluster Clinical Research Ethics Committee (CREC).

**Data sharing statement**

No additional data are available

**Disclaimer**

The opinions and assertions contained herein are private views of the authors and do not necessarily reflect those of the Centre for Health Protection, Hong Kong Special Administrative Region Government Department of Health, or the other affiliating institutions.

## REFERENCES

1. Battegay M, Nüesch R, Hirschel B, et al. Immunological recovery and antiretroviral therapy in HIV-1 infection. *The Lancet Infectious Diseases* 2006;6:280-87. doi: 10.1016/S1473-3099(06)70463-7
2. Gazzola L, Tincati C, Bellistri GM, et al. The absence of CD4+ T cell count recovery despite receipt of virologically suppressive highly active antiretroviral therapy: clinical risk, immunological gaps, and therapeutic options. *Clinical infectious diseases : an official publication of the Infectious Diseases Society of America* 2009;48(3):328-37. doi: 10.1086/595851
3. Tsiara CG, Nikolopoulos GK, Dimou NL, et al. Effect of hepatitis C virus on immunological and virological responses in HIV-infected patients initiating highly active antiretroviral therapy: a meta-analysis. *J Viral Hepat* 2013;20(10):715-24. doi: 10.1111/jvh.12101
4. Helleberg M, Kronborg G, Ullum H, et al. Course and Clinical Significance of CD8+ T-Cell Counts in a Large Cohort of HIV-Infected Individuals. *J Infect Dis* 2015;211(11):1726-34. doi: 10.1093/infdis/jiu669
5. Seng R, Goujard C, Krastinova E, et al. Influence of lifelong cumulative HIV viremia on long-term recovery of CD4+ cell count and CD4+/CD8+ ratio among patients on combination antiretroviral therapy. *AIDS (London, England)* 2015;29:595-607. doi: 10.1097/QAD.0000000000000571
6. Marconi VC, Grandits G, Okulicz JF, et al. Cumulative viral load and virologic decay patterns after antiretroviral therapy in HIV-infected subjects influence CD4 recovery and AIDS. *PLoS One* 2011;6(5):e17956. doi: 10.1371/journal.pone.0017956
7. Gaardbo JC, Hartling HJ, Gerstoft J, et al. Incomplete immune recovery in HIV infection: mechanisms, relevance for clinical care, and possible solutions. *Clin Dev Immunol* 2012;2012:670957. doi: 10.1155/2012/670957
8. World Health Organization. WHO | Guideline on when to start antiretroviral therapy and on pre-exposure prophylaxis for HIV 2015 [updated 2015-10-09 06:58:51].
9. Saracino A, Bruno G, Scudeller L, et al. Chronic inflammation in a long-term cohort of HIV-infected patients according to the normalization of the CD4:CD8 ratio. *AIDS research and human retroviruses* 2014;30:1178-84. doi: 10.1089/aid.2014.0080
10. Mussini C, Lorenzini P, Cozzi-Lepri A, et al. CD4/CD8 ratio normalisation and non-AIDS-related events in individuals with HIV who achieve viral load suppression with antiretroviral therapy: an observational cohort study. *Lancet HIV* 2015;2(3):e98-106. doi: 10.1016/S2352-3018(15)00006-5
11. Lu W, Mehraj V, Vyboh K, et al. CD4:CD8 ratio as a frontier marker for clinical outcome, immune dysfunction and viral reservoir size in virologically suppressed HIV-positive patients. *J Int AIDS Soc* 2015;18:20052. doi: 10.7448/IAS.18.1.20052
12. Serrano-Villar S, Sainz T, Lee SA, et al. HIV-infected individuals with low CD4/CD8 ratio despite effective antiretroviral therapy exhibit altered T cell subsets, heightened CD8+ T cell activation, and increased risk of non-AIDS morbidity and mortality. *PLoS Pathog* 2014;10(5):e1004078. doi:

- 10.1371/journal.ppat.1004078
13. Badejo OA, Chang CC, So-Armah KA, et al. CD8+ T-cells count in acute myocardial infarction in HIV disease in a predominantly male cohort. *Biomed Res Int* 2015;2015:246870. doi: 10.1155/2015/246870
  14. Serrano-Villar S, Deeks SG. CD4/CD8 ratio: an emerging biomarker for HIV. *Lancet HIV* 2015;2(3):e76-7. doi: 10.1016/S2352-3018(15)00018-1
  15. Zoufaly A, Stellbrink H-J, Heiden MAd, et al. Cumulative HIV viremia during highly active antiretroviral therapy is a strong predictor of AIDS-related lymphoma. *The Journal of Infectious Diseases* 2009;200:79-87. doi: 10.1086/599313
  16. Pantazis N, Porter K, Costagliola D, et al. Temporal trends in prognostic markers of HIV-1 virulence and transmissibility: an observational cohort study. *Lancet HIV* 2014;1(3):e119-26. doi: 10.1016/S2352-3018(14)00002-2
  17. Menozzi M, Zona S, Santoro A, et al. CD4/CD8 ratio is not predictive of multi-morbidity prevalence in HIV-infected patients but identify patients with higher CVD risk. *J Int AIDS Soc* 2014;17(4 Suppl 3):19709. doi: 10.7448/IAS.17.4.19709
  18. Cao W, Mehraj V, Trottier B, et al. Early Initiation Rather Than Prolonged Duration of Antiretroviral Therapy in HIV Infection Contributes to the Normalization of CD8 T-Cell Counts. *Clinical infectious diseases : an official publication of the Infectious Diseases Society of America* 2016;62(2):250-7. doi: 10.1093/cid/civ809
  19. Naftalin CM, Wong NS, Chan DP, et al. Three different patterns of CD4 recovery in a cohort of Chinese HIV patients following antiretroviral therapy - a five-year observational study. *International journal of STD & AIDS* 2015;26:803-09. doi: 10.1177/0956462414553826
  20. Wong NS, Reidpath DD, Wong KH, et al. A multilevel approach to assessing temporal change of CD4 recovery following HAART initiation in a cohort of Chinese HIV positive patients. *J Infect* 2015;70(6):676-8. doi: 10.1016/j.jinf.2014.10.012
  21. Ford N, Meintjes G, Pozniak A, et al. The future role of CD4 cell count for monitoring antiretroviral therapy. *Lancet Infect Dis* 2015;15(2):241-7. doi: 10.1016/S1473-3099(14)70896-5
  22. Kaufmann GR, Furrer H, Ledergerber B, et al. Characteristics, determinants, and clinical relevance of CD4 T cell recovery to <500 cells/microL in HIV type 1-infected individuals receiving potent antiretroviral therapy. *Clinical infectious diseases : an official publication of the Infectious Diseases Society of America* 2005;41(3):361-72. doi: 10.1086/431484
  23. INSIGHT START Study Group, Lundgren JD, Babiker AG, et al. Initiation of Antiretroviral Therapy in Early Asymptomatic HIV Infection. *N Engl J Med* 2015;373(9):795-807. doi: 10.1056/NEJMoa1506816
  24. Leung V, Gillis J, Raboud J, et al. Predictors of CD4:CD8 ratio normalization and its effect on health outcomes in the era of combination antiretroviral therapy. *PLoS One* 2013;8(10):e77665. doi: 10.1371/journal.pone.0077665
  25. Lichtenstein KA, Armon C, Nagabhushanam V, et al. A pilot study to assess inflammatory biomarker changes when raltegravir is added to a virologically suppressive HAART regimen in HIV-1-infected patients with limited immunological responses. *Antiviral Therapy* 2012;17:1301-09. doi:



- 10.3851/IMP2350
26. Cao W, Mehraj V, Kaufmann DE, et al. Elevation and persistence of CD8 T-cells in HIV infection: the Achilles heel in the ART era. *J Int AIDS Soc* 2016;19(1):20697. doi: 10.7448/IAS.19.1.20697
  27. Mudd JC, Lederman MM. CD8 T cell persistence in treated HIV infection. *Curr Opin HIV AIDS* 2014;9(5):500-5. doi: 10.1097/COH.0000000000000086
  28. Jones RB, Walker BD. HIV-specific CD8(+) T cells and HIV eradication. *J Clin Invest* 2016;126(2):455-63. doi: 10.1172/JCI80566
  29. Serrano-Villar S, Perez-Elias MJ, Dronza F, et al. Increased risk of serious non-AIDS-related events in HIV-infected subjects on antiretroviral therapy associated with a low CD4/CD8 ratio. *PLoS One* 2014;9(1):e85798. doi: 10.1371/journal.pone.0085798
  30. Sainz T, Serrano-Villar S, Diaz L, et al. The CD4/CD8 ratio as a marker T-cell activation, senescence and activation/exhaustion in treated HIV-infected children and young adults. *AIDS* 2013;27(9):1513-6. doi: 10.1097/QAD.0b013e32835faa72
  31. De Salvador-Guillouet F, Sakarovitch C, Durant J, et al. Antiretroviral Regimens and CD4/CD8 Ratio Normalization in HIV-Infected Patients during the Initial Year of Treatment: A Cohort Study. *PLoS One* 2015;10(10):e0140519. doi: 10.1371/journal.pone.0140519
  32. Saracino A, Bruno G, Scudeller L, et al. CD4 and CD4/CD8 ratio progression in HIV-HCV infected patients after achievement of SVR. *J Clin Virol* 2016;81:94-9. doi: 10.1016/j.jcv.2016.05.019
  33. Brites-Alves C, Netto EM, Brites C. Coinfection by Hepatitis C Is Strongly Associated with Abnormal CD4/CD8 Ratio in HIV Patients under Stable ART in Salvador, Brazil. *J Immunol Res* 2015;2015:174215. doi: 10.1155/2015/174215
  34. Freeman ML, Mudd JC, Shive CL, et al. CD8 T-Cell Expansion and Inflammation Linked to CMV Coinfection in ART-treated HIV Infection. *Clinical infectious diseases : an official publication of the Infectious Diseases Society of America* 2016;62(3):392-6. doi: 10.1093/cid/civ840
  35. Smith DM, Nakazawa M, Freeman ML, et al. Asymptomatic CMV Replication During Early Human Immunodeficiency Virus (HIV) Infection Is Associated With Lower CD4/CD8 Ratio During HIV Treatment. *Clinical infectious diseases : an official publication of the Infectious Diseases Society of America* 2016;63(11):1517-24. doi: 10.1093/cid/ciw612

**Table 1. General characteristics of study population (n=718)**

|                                        | frequency     | %            |
|----------------------------------------|---------------|--------------|
|                                        | <u>median</u> | <u>(IQR)</u> |
| <b>(a) Demographics</b>                |               |              |
| Male gender                            | 605           | 84%          |
| Ethnicity                              |               |              |
| Chinese                                | 581           | 81%          |
| Asian (Asian other than Chinese)       | 87            | 12%          |
| White                                  | 47            | 7%           |
| African                                | 3             | 0.4%         |
| Age (yrs, at HIV diagnosis)            | <u>37</u>     | (31 to 45)   |
| <b>(b) HIV infection and diagnosis</b> |               |              |
| Mode of transmission                   |               |              |
| heterosexual                           | 394           | 55%          |
| man-to-man sex                         | 280           | 39%          |
| injection drug use                     | 34            | 5%           |
| contaminated blood transfusion         | 6             | 1%           |
| undetermined                           | 4             | 1%           |
| HIV-1 Subtype                          |               |              |
| CRF01_AE                               | 270           | 38%          |
| B                                      | 224           | 31%          |
| C                                      | 8             | 1%           |
| Others                                 | 31            | 4%           |
| unavailable                            | 185           | 26%          |
| AIDS diagnosis before treatment        | 239           | 33%          |
| Late HIV diagnosis*                    | 192           | 27%          |

|                                                                                                  | frequency     | %                 |
|--------------------------------------------------------------------------------------------------|---------------|-------------------|
|                                                                                                  | <u>median</u> | <u>(IQR)</u>      |
| estimated cumulative viral load <sup>#</sup> from seroconversion to diagnosis (n=199)            | <u>8</u>      | (3 to 18)         |
| <b>(c) Pre-HAART status</b>                                                                      |               |                   |
| Age (yrs)                                                                                        | <u>39</u>     | (33 to 46)        |
| Months from diagnosis to treatment initiation                                                    | <u>8.67</u>   | (2.75 to 33.13)   |
| CD4 count (cells/ $\mu$ L)                                                                       | <u>109</u>    | (29 to 190)       |
| CD4/CD8 ratio <sup>a</sup>                                                                       | <u>0.14</u>   | (0.06 to 0.23)    |
| CD8 count (cells/ $\mu$ L) <sup>a</sup>                                                          | <u>673</u>    | (441 to 966)      |
| Viral load (log <sub>10</sub> copies/mL) <sup>b</sup>                                            | <u>5.15</u>   | (4.62 to 5.58)    |
| Estimated cumulative viral load <sup>#</sup> from seroconversion to treatment initiation (n=199) | <u>18</u>     | (11 to 29)        |
| <b>(d) Antiretroviral treatment and clinical outcomes</b>                                        |               |                   |
| First HAART regimen                                                                              |               |                   |
| NNRTI-based                                                                                      | 182           | 25%               |
| PI-based                                                                                         | 131           | 18%               |
| PI-based with booster                                                                            | 397           | 55%               |
| non-standard                                                                                     | 8             | 1%                |
| Total treatment duration (months)                                                                | <u>85.38</u>  | (63.39 to 117.32) |
| AIDS Free during treatment (n=479)                                                               | 456           | 95%               |
| Highest CD4 count within 4 years <sup>c</sup>                                                    | <u>476</u>    | (354 to 630)      |
| Highest CD4/CD8 ratio within 4 years <sup>d</sup>                                                | <u>0.55</u>   | (0.39 to 0.76)    |

|                                                              | frequency     | %            |
|--------------------------------------------------------------|---------------|--------------|
|                                                              | <u>median</u> | <u>(IQR)</u> |
| CD4 count $\geq 500/\mu\text{L}$ within 4 years <sup>c</sup> | 318           | 44%          |
| CD4/CD8 ratio $\geq 0.8$ within 4 years <sup>e</sup>         | 145           | 20%          |
| Deceased                                                     | 39            | 5%           |

\*Late HIV diagnosis refers to the diagnosis of AIDS within 3 months of HIV diagnosis

# Estimated cumulative viral load expressed as years\*log<sub>10</sub> viral load copies/mL

<sup>a</sup> 14 missing values; <sup>b</sup> 18 missing values; <sup>c</sup> 2 missing values; <sup>d</sup> 8 missing values; <sup>e</sup> 3 missing values

**Table 2 The profiles of immunological outcomes of patients by achievement of none, one or both of the 2 target immunological markers (CD4  $\geq$ 500, CD4/CD8 ratio  $\geq$ 0.8) before the end of a 4-year observation period#**

|                                                | no. | median peak or highest CD4 count (/μL) (IQR) | median months to CD4 target (IQR) | median peak or highest CD4:CD8 ratio (IQR) | median months to target CD4:CD8 ratio (IQR) |
|------------------------------------------------|-----|----------------------------------------------|-----------------------------------|--------------------------------------------|---------------------------------------------|
| CD4 $\geq$ 500/μL and CD4:CD8 ratio $\geq$ 0.8 | 105 | 741 (618 to 876)                             | 20.63 (12.6 to 30.53)             | 0.98 (0.86 to 1.2)                         | 28.90 (14.43 to 42.95)                      |
| Concurrent achievement of both targets         | 15  | 694 (569 to 1182)                            | 20.27 (13.07 to 28.17)            | 1.05 (0.9 to 1.49)                         | 20.27 (13.07 to 28.17)                      |
| CD4 target before ratio target                 | 57  | 788 (660 to 921)                             | 15.13 (8.7 to 22.88)              | 0.89 (0.83 to 0.99)                        | 39.23 (30.78 to 45.98)                      |
| Ratio target before CD4 target                 | 33  | 650 (547 to 764)                             | 31.13 (22.3 to 39.4)              | 1.17 (1.02 to 1.56)                        | 14.40 (8.68 to 24.08)                       |
| CD4 $\geq$ 500/μL only                         | 205 | 622 (552 to 723)                             | 29.10 (17.43 to 38.37)            | 0.59 (0.49 to 0.69)                        | /                                           |
| Ratio $\geq$ 0.8 only                          | 32  | 431 (369 to 475)                             | /                                 | 1.05 (0.89 to 1.17)                        | 29.32 (18.48 to 40.33)                      |
| CD4 target then changed to ratio target        | 4   | 588 (519 to 660)                             | 20.02 (12.23 to 35.36)            | 0.86 (0.81 to 0.95)                        | 36.83 (20.68 to 49.72)                      |
| Ratio target then changed to CD4 target        | 4   | 583 (521 to 636)                             | 29.68 (20.52 to 40.38)            | 0.87 (0.86 to 1.01)                        | 13.87 (5.48 to 25.45)                       |
| Failure to achieve both targets                | 365 | 362 (253 to 432)                             | /                                 | 0.43 (0.31 to 0.55)                        | /                                           |

#Equivalent to a maximum of <52 months with the inclusion of a 3-month buffer period;

**Table 3. Comparison between patients with high (>800/ $\mu$ L) and low ( $\leq$ 800/ $\mu$ L) pre-HAART CD8 counts**

Variables included in the analyses were (a) general baseline characteristics, (b) pre-HAART virological status, (c) antiretroviral therapy, and (d) outcome at year 4.

|                                     | pre-HAART<br>CD8 >800<br>(n=276) |                  | pre-HAART<br>CD8 $\leq$ 800<br>(n=428) |                  | Univariate<br>analysis | adjusted by<br>pre-HAART CD4 |            |               |
|-------------------------------------|----------------------------------|------------------|----------------------------------------|------------------|------------------------|------------------------------|------------|---------------|
|                                     | median/<br><u>no.</u>            | IQR/<br><u>%</u> | median/<br><u>no.</u>                  | IQR/<br><u>%</u> | OR                     | 95% CI                       | aOR        | 95% CI        |
| <b>(a) Baseline characteristics</b> |                                  |                  |                                        |                  |                        |                              |            |               |
| Male gender                         | 242                              | 87.7%            | 352                                    | 82.2%            | 0.65                   | 0.42 to 1.01                 | 1.82       | 1.12 to 2.96* |
| Chinese ethnicity                   | 222                              | 80.4%            | 351                                    | 82.0%            | 1.11                   | 0.75 to 1.63                 | 1.10       | 0.71 to 1.71  |
| Mode of transmission                | (n=372)                          |                  | (n=427)                                |                  |                        |                              |            |               |
| MSM                                 | 120                              | 44.0%            | 153                                    | 35.8%            | <i>ref</i>             |                              | <i>ref</i> |               |
| Heterosexual                        | 140                              | 51.3%            | 249                                    | 58.3%            | 1.39                   | 1.02 to 1.91*                | 0.93       | 0.65 to 1.33  |
| injection drug user                 | 13                               | 4.8%             | 19                                     | 4.4%             | 1.15                   | 0.54 to 2.41                 | 0.47       | 0.21 to 1.08  |
| contaminated blood transfusion      | 0                                | 0.0%             | 6                                      | 1.4%             | /                      |                              | /          |               |
| Subtype                             | (n=206)                          |                  | (n=322)                                |                  |                        |                              |            |               |
| CRF01_AE                            | 95                               | 46.1%            | 171                                    | 53.1%            | <i>ref</i>             |                              | <i>ref</i> |               |
| B                                   | 94                               | 45.6%            | 129                                    | 40.1%            | 0.76                   | 0.53 to 1.1                  | 1.35       | 0.88 to       |

|                                             | pre-HAART<br>CD8 >800<br>(n=276) | pre-HAART<br>CD8 ≤800<br>(n=428) | Univariate<br>analysis    | adjusted by<br>pre-HAART CD4 |       |            |       |             |
|---------------------------------------------|----------------------------------|----------------------------------|---------------------------|------------------------------|-------|------------|-------|-------------|
|                                             | median/IQR/<br><u>no.</u>        | %<br><u>no.</u>                  | median/IQR/<br><u>no.</u> | %                            | OR    | 95% CI     | aOR   | 95% CI      |
|                                             |                                  |                                  |                           |                              |       |            |       | 2.06        |
| C                                           | 4                                | 1.9%                             | 4                         | 1.2%                         | 0.56  | 0.14 to    | 1.13  | 0.25 to     |
|                                             |                                  |                                  |                           |                              |       | 2.27       |       | 5.07        |
| Others                                      | 13                               | 6.3%                             | 18                        | 5.6%                         | 0.77  | 0.36 to    | 1.37  | 0.6 to 3.17 |
|                                             |                                  |                                  |                           |                              |       | 1.64       |       |             |
| Age at diagnosis<br>(yrs)                   | 36.80                            | 31.74 to                         | 37.46                     | 30.27 to                     | 1.00  | 0.98 to    | 0.99  | 0.98 to     |
|                                             |                                  | 43.54                            |                           | 45.17                        |       | 1.01       |       | 1.01        |
| Late HIV diagnosis                          | 48                               | 17.4%                            | 138                       | 32.2%                        | 2.26  | 1.56 to    | 0.98  | 0.64 to     |
|                                             |                                  |                                  |                           |                              |       | 3.28*      |       | 1.51        |
| AIDS before<br>treatment                    | 66                               | 23.9%                            | 168                       | 39.3%                        | 2.06  | 1.47 to    | 0.94  | 0.63 to     |
|                                             |                                  |                                  |                           |                              |       | 2.88*      |       | 1.41        |
| <b>(b) Pre-HAART virological status</b>     |                                  |                                  |                           |                              |       |            |       |             |
| viral load (log <sub>10</sub><br>copies/mL) | (n=274)                          |                                  | (n=420)                   |                              |       |            |       |             |
|                                             | 5.04                             | 4.55 to                          | 5.20                      | 4.69 to                      | 1.23  | 1.03-1.47* | 0.80  | 0.64-0.99*  |
|                                             |                                  | 5.52                             |                           | 5.58                         |       |            |       |             |
| Viral load log <sub>10</sub> > 145          | 52.9%                            |                                  | 259                       | 61.7%                        | 1.43  | 1.05 to    | 0.71  | 0.49 to     |
| 5                                           |                                  |                                  |                           |                              |       | 1.95*      |       | 1.02        |
| Estimated<br>cumulative viral<br>load #     | (n=96)                           |                                  | (n=101)                   |                              |       |            |       |             |
|                                             | 17.74                            | 10.00 to                         | 18.53                     | 10.88 to                     | 1.004 | 0.98 to    | 1.004 | 0.98 to     |

|                                           | pre-HAART<br>CD8 >800<br>(n=276) | pre-HAART<br>CD8 ≤800<br>(n=428) | Univariate<br>analysis | adjusted by<br>pre-HAART CD4 |
|-------------------------------------------|----------------------------------|----------------------------------|------------------------|------------------------------|
|                                           | median/IQR/<br><u>no.</u> %      | median/IQR/<br><u>no.</u> %      | OR                     | 95% CI                       |
|                                           |                                  |                                  | aOR                    | 95% CI                       |
|                                           | 29.61                            | 27.73                            | 1.03                   | 1.03                         |
| <b>(c) Antiretroviral treatment</b>       |                                  |                                  |                        |                              |
| Months from diagnosis to HAART initiation | 12.80                            | 3.87 to 5.60                     | 2.44 to 1.00           | 0.99 to 1                    |
|                                           | 35.52                            | 30.58                            |                        | 1.01                         |
| NNRTI-based initial regimen               | 70                               | 25.4%                            | 105                    | 24.5%                        |
|                                           |                                  |                                  | 0.96                   | 0.67 to 1.84                 |
|                                           |                                  |                                  | 1.36                   | 1.22 to 2.78*                |
| <b>(d) Outcome at Year 4</b>              |                                  |                                  |                        |                              |
| CD4 count /μL                             | (n=246)                          | (n=370)                          |                        |                              |
|                                           | 488                              | 386 to 437                       | 332 to 589             | 0.999                        |
|                                           | 625                              |                                  |                        | 0.998 to 1                   |
|                                           |                                  |                                  |                        | 1.001                        |
|                                           |                                  |                                  |                        | 0.9997 to 1.002              |
| CD4>500/μL                                | 117                              | 47.6%                            | 141                    | 38.1%                        |
|                                           |                                  |                                  | 0.68                   | 0.49 to 1.29                 |
|                                           |                                  |                                  | 0.94*                  | 0.88 to 1.91                 |
| CD4/CD8 ratio                             | (n=246)                          | (n=370)                          |                        |                              |
|                                           | 0.49                             | 0.36 to 0.57                     | 0.41 to 3.61           | 1.93 to 64.63                |
|                                           | 0.68                             | 0.79                             | 6.75*                  | 23.47 to 177.98*             |
| Viral load (log <sub>10</sub> copies/mL)  | (n=245)                          | (n=366)                          |                        |                              |
|                                           | 1.88                             | 1.88 to 1.88                     | 1.88 to 1.18           | 0.73 to 0.83                 |
|                                           | 2.6                              | 2.6                              | 1.91                   | 0.48 to 1.44                 |
| Suppressed viral                          | 245                              | 100.0%                           | 364                    | 99.5%                        |
|                                           |                                  |                                  | /                      | /                            |



|                                   | pre-HAART<br>CD8 >800<br>(n=276) |          | pre-HAART<br>CD8 ≤800<br>(n=428) |          | Univariate<br>analysis | adjusted by<br>pre-HAART CD4 |       |         |
|-----------------------------------|----------------------------------|----------|----------------------------------|----------|------------------------|------------------------------|-------|---------|
|                                   | median/IQR/<br><u>no.</u>        | %        | median/IQR/<br><u>no.</u>        | %        | OR                     | 95% CI                       | aOR   | 95% CI  |
| load (≤500<br>copies/mL)          |                                  |          |                                  |          |                        |                              |       |         |
| CD4>500/μL &<br>CD4/CD8 ratio>0.8 | (n=243)                          |          | (n=370)                          |          |                        |                              |       |         |
|                                   | 24                               | 9.9%     | 59                               | 15.9%    | 1.73                   | 1.04 to                      | 5.07  | 2.74 to |
|                                   |                                  |          |                                  |          |                        | 2.87*                        |       | 9.41*   |
| Treatment (months)                | 83.83                            | 62.13 to | 85.05                            | 64.17 to | 1.000                  | 0.997 to                     | 0.999 | 0.99 to |
|                                   |                                  | 117.42   |                                  | 116.75   |                        | 1.004                        |       | 1.003   |

Note: all analyses were performed in logistic regression: simple logistic regression for univariate analyses, and multivariable logistic regression with selected confounders for multivariable analyses.

# Estimated cumulative viral load from seroconversion expressed as years\*log<sub>10</sub> viral load copies/mL

\*p<0.05

<sup>a</sup> 1 missing value; <sup>b</sup> 2 missing value

**Table 4. Multivariable logistic regression for evaluating variables associated with a) an optimal immunological outcome and b) conventional outcome**

An optimal immunological outcome was defined as achieved CD4 count  $\geq 500/\mu\text{L}$  and a CD4/CD8 ratio  $\geq 0.8$ , and conventional outcome was defined as only achieved CD4 count  $\geq 500/\mu\text{L}$  by study end-point

|                                      | a) optimal immune outcome |                 | b) conventional outcome |               |
|--------------------------------------|---------------------------|-----------------|-------------------------|---------------|
|                                      | aOR                       | 95%C.I.         | aOR                     | 95%C.I.       |
| Male gender                          | 2.23                      | 1.4 to 3.53*    | 1.81                    | 1.11 to 2.96* |
| Age at HAART initiation              | 0.98                      | 0.97 to 0.9996* | 0.96                    | 0.94 to 0.97* |
| Pre-HAART CD4 ( $\mu\text{L}$ )      |                           |                 |                         |               |
| <=100                                | <i>ref</i>                |                 | <i>ref</i>              |               |
| 101-200                              | 2.91                      | 1.83 to 4.62*   | 2.30                    | 1.57 to 3.37* |
| 201-300                              | 4.61                      | 2.53 to 8.39*   | 3.52                    | 2.1 to 5.9*   |
| >300                                 | 20.36                     | 7.51 to 55.17*  | 12.84                   | 3.6 to 45.75* |
| Months on treatment                  |                           |                 |                         |               |
| 49-72                                | <i>ref</i>                |                 | <i>ref</i>              |               |
| 73-96                                | 1.58                      | 0.93 to 2.67    | 1.67                    | 1.08 to 2.57* |
| $\geq 97$                            | 3.34                      | 2.17 to 5.15*   | 2.78                    | 1.89 to 4.09* |
| Pre-HAART CD8 $\leq 800/\mu\text{L}$ | 0.998                     | 0.998 to 0.999* |                         |               |
| Constant                             | 0.48                      |                 | 3.30                    |               |

aOR – adjusted odds ratio;

\* $p < 0.05$

**FIGURE LEGENDS**

**Figure 1.** Yearly changes of (a) CD4 count, (b) CD8 count, and (c) CD4/CD8 ratio from HAART initiation to 6 years afterwards.

**Supplementary material**

**Supplementary Figure 1.** Correlations between immunological markers of the study population in scattered plots with fitting line and 95% confidence interval (dotted lines): (a) pre-HAART CD8 versus pre-HAART CD4; (b) CD4 at year 4 versus pre-HAART CD4; (c) CD8 at year 4 versus pre-HAART CD4; (d) CD8 at year 4 versus CD4 at year 4; (e) CD8 at year 4 versus pre-HAART CD8; (f) CD4 at year 4 versus pre-HAART CD8.

**Supplementary Table 1.** Relationship between CD4 count and corresponding CD4/CD8 ratio at (a) baseline before initiation of highly active antiretroviral therapy (pre-HAART) and (b) outcome at the end of Year 4 following HAART

**Supplementary Table 2.** Comparison of CD4 count, CD8 count and CD4/CD8 ratio between patients achieved optimal immune outcome and conventional outcome by Year 4 in generalized estimating equations

1  
2  
3  
4  
5  
6  
7  
8  
9  
10  
11  
12  
13  
14  
15  
16  
17  
18  
19  
20  
21  
22  
23  
24  
25  
26  
27  
28  
29  
30  
31  
32  
33  
34  
35  
36  
37  
38  
39  
40  
41  
42  
43  
44  
45  
46  
47  
48  
49  
50  
51  
52  
53  
54  
55  
56  
57  
58  
59  
60



Yearly changes of (a) CD4 count, (b) CD8 count, and (c) CD4/CD8 ratio from HAART initiation to 6 years afterwards

275x397mm (300 x 300 DPI)

1  
2  
3  
4  
5  
6  
7  
8  
9  
10  
11  
12  
13  
14  
15  
16  
17  
18  
19  
20  
21  
22  
23  
24  
25  
26  
27  
28  
29  
30  
31  
32  
33  
34  
35  
36  
37  
38  
39  
40  
41  
42  
43  
44  
45  
46  
47  
48  
49  
50  
51  
52  
53  
54  
55  
56  
57  
58  
59  
60



(c) pre-HAART CD8 (cells/ $\mu$ L) vs year 4 CD8 (cells/ $\mu$ L)



(d) pre-HAART CD8 (cells/ $\mu$ L) vs pre-HAART CD4 (cells/ $\mu$ L)



(e) pre-HAART CD4 (cells/ $\mu$ L) vs year 4 CD8 (cells/ $\mu$ L)



(f) year 4 CD8 (cells/ $\mu$ L) vs year 4 CD4 (cells/ $\mu$ L)



**Supplementary Table 1.** Relationship between CD4 count and corresponding CD4/CD8 ratio at (a) baseline before initiation of highly active antiretroviral therapy (pre-HAART) and (b) outcome at the end of Year 4 following HAART

(a) Baseline (pre-HAART)

|            |                     | CD4/CD8 ratio    |                |                 |                   |
|------------|---------------------|------------------|----------------|-----------------|-------------------|
|            |                     | <0.4             | 0.4-0.79       | >=0.8           | <u>Total</u>      |
| <b>CD4</b> | <b>&lt;50</b>       | 240 (34%)        | 0 (0%)         | 0 (0%)          | <u>240 (34%)</u>  |
|            | <b>50-199</b>       | 293 (42%)        | 23 (3%)        | 0 (0%)          | <u>316 (45%)</u>  |
|            | <b>200-499</b>      | 124 (18%)        | 17 (2%)        | 1 (0.1%)        | <u>142 (20%)</u>  |
|            | <b>&gt;=500</b>     | 0 (0%)           | 4 (1%)         | 2 (0.3%)        | <u>6 (1%)</u>     |
|            | <b><u>Total</u></b> | <u>657 (93%)</u> | <u>44 (6%)</u> | <u>3 (0.4%)</u> | <u>704 (100%)</u> |

(b) Outcome at the end of Year 4

|            |                     | CD4/CD8 ratio    |                  |                  |                   |
|------------|---------------------|------------------|------------------|------------------|-------------------|
|            |                     | <0.4             | 0.4-0.79         | >=0.8            | <u>Total</u>      |
| <b>CD4</b> | <b>&lt;50</b>       | 1 (0.2%)         | 0 (0%)           | 0 (0%)           | <u>1 (0.2%)</u>   |
|            | <b>50-199</b>       | 33 (5%)          | 6 (1%)           | 0 (0%)           | <u>39 (6%)</u>    |
|            | <b>200-499</b>      | 130 (21%)        | 193 (31%)        | 36 (6%)          | <u>359 (58%)</u>  |
|            | <b>&gt;=500</b>     | 24 (4%)          | 134 (22%)        | 65 (10%)         | <u>223 (36%)</u>  |
|            | <b><u>Total</u></b> | <u>188 (30%)</u> | <u>333 (54%)</u> | <u>101 (16%)</u> | <u>622 (100%)</u> |

**Supplementary Table 2. Comparison of CD4 count, CD8 count and CD4/CD8 ratio between patients achieved optimal immune outcome and conventional outcome by Year 4 in generalized estimating equations**

| Model:                              | a. CD4 (cells/ $\mu$ L) |                   | b. CD8 (cells/ $\mu$ L) |                   | c. CD4/CD8 ratio |               |
|-------------------------------------|-------------------------|-------------------|-------------------------|-------------------|------------------|---------------|
|                                     | B                       | 95%C.I.           | B                       | 95%C.I.           | B                | 95%C.I.       |
| <b>(Intercept)</b>                  | 282.86                  | 273.99 to         | 1142.76                 | 1105.97 to        | 0.24             | 0.22 to 0.25* |
|                                     |                         | 291.74*           |                         | 1179.55*          |                  |               |
| <b>Months from HAART initiation</b> |                         |                   |                         |                   |                  |               |
| >96 months                          | 421.75                  | 400.9 to 442.59*  | -54.91                  | -95.36 to -14.47* | 0.49             | 0.46 to 0.52* |
| 84-96                               | 388.40                  | 366.41 to 410.39* | -18.28                  | -61.83 to 25.27   | 0.44             | 0.41 to 0.47* |
| 72-84                               | 375.13                  | 358.62 to 391.64* | -18.79                  | -58.14 to 20.57   | 0.41             | 0.39 to 0.43* |
| 60-72                               | 328.63                  | 314.74 to 342.52* | -50.54                  | -85.11 to -15.98* | 0.37             | 0.35 to 0.39* |
| 48-60                               | 297.14                  | 283.97 to 310.3*  | -19.01                  | -48.33 to 10.3    | 0.34             | 0.31 to 0.37* |
| 36-48                               | 267.56                  | 256.63 to 278.49* | -14.72                  | -42.71 to 13.28   | 0.28             | 0.26 to 0.3*  |
| 24-36                               | 207.20                  | 196.89 to 217.52* | 19.10                   | -7.03 to 45.24    | 0.20             | 0.19 to 0.22* |
| 12-24                               | 119.10                  | 111.79 to 126.42* | 61.80                   | 37.11 to 86.48*   | 0.10             | 0.08 to 0.12* |
| <=12 months                         | 0 <sup>a</sup>          |                   | 0 <sup>a</sup>          |                   | 0 <sup>a</sup>   |               |
| <b>Achievement by year 4</b>        |                         |                   |                         |                   |                  |               |
| optimal                             | 97.55                   | 80.71 to 114.39*  | -401.33                 | -437.93 to        | 0.41             | 0.37 to 0.45* |
| immune                              |                         |                   |                         | -364.74*          |                  |               |

1  
2  
3  
4 outcome

5  
6  
7 conventional 0<sup>a</sup> 0<sup>a</sup> 0<sup>a</sup>

8  
9  
10 outcome

11  
12  
13 (Scale) 31443 151917 0.06

---

14  
15  
16 \*p<0.05

17 optimal immune outcome – achievement of CD4≥500/μL and CD4/CD8 ratio ≥0.8 by  
18 Year 4;

19 conventional outcome – achievement of only CD4≥500/μL by Year 4;

20  
21  
22  
23  
24  
25  
26  
27  
28  
29  
30  
31  
32  
33  
34  
35  
36  
37  
38  
39  
40  
41  
42  
43  
44  
45  
46  
47  
48  
49  
50  
51  
52  
53  
54  
55  
56  
57  
58  
59  
60



STROBE 2007 (v4) Statement—Checklist of items that should be included in reports of *cohort studies*

| Section/Topic                | Item # | Recommendation                                                                                                                                                                       | Reported on page # |
|------------------------------|--------|--------------------------------------------------------------------------------------------------------------------------------------------------------------------------------------|--------------------|
| Title and abstract           | 1      | (a) Indicate the study's design with a commonly used term in the title or the abstract                                                                                               | 1                  |
|                              |        | (b) Provide in the abstract an informative and balanced summary of what was done and what was found                                                                                  | 3                  |
| <b>Introduction</b>          |        |                                                                                                                                                                                      |                    |
| Background/rationale         | 2      | Explain the scientific background and rationale for the investigation being reported                                                                                                 | 5-6                |
| Objectives                   | 3      | State specific objectives, including any prespecified hypotheses                                                                                                                     | 6                  |
| <b>Methods</b>               |        |                                                                                                                                                                                      |                    |
| Study design                 | 4      | Present key elements of study design early in the paper                                                                                                                              | 6                  |
| Setting                      | 5      | Describe the setting, locations, and relevant dates, including periods of recruitment, exposure, follow-up, and data collection                                                      | 7                  |
| Participants                 | 6      | (a) Give the eligibility criteria, and the sources and methods of selection of participants. Describe methods of follow-up                                                           | 7                  |
|                              |        | (b) For matched studies, give matching criteria and number of exposed and unexposed                                                                                                  | NA                 |
| Variables                    | 7      | Clearly define all outcomes, exposures, predictors, potential confounders, and effect modifiers. Give diagnostic criteria, if applicable                                             | 7-8                |
| Data sources/<br>measurement | 8*     | For each variable of interest, give sources of data and details of methods of assessment (measurement). Describe comparability of assessment methods if there is more than one group | 7                  |
| Bias                         | 9      | Describe any efforts to address potential sources of bias                                                                                                                            | 14-15              |
| Study size                   | 10     | Explain how the study size was arrived at                                                                                                                                            | NA                 |
| Quantitative variables       | 11     | Explain how quantitative variables were handled in the analyses. If applicable, describe which groupings were chosen and why                                                         | 8                  |
| Statistical methods          | 12     | (a) Describe all statistical methods, including those used to control for confounding                                                                                                | 7-8                |
|                              |        | (b) Describe any methods used to examine subgroups and interactions                                                                                                                  | NA                 |
|                              |        | (c) Explain how missing data were addressed                                                                                                                                          | 8                  |
|                              |        | (d) If applicable, explain how loss to follow-up was addressed                                                                                                                       | NA                 |
|                              |        | (e) Describe any sensitivity analyses                                                                                                                                                | NA                 |
| <b>Results</b>               |        |                                                                                                                                                                                      |                    |

|                          |     |                                                                                                                                                                                                              |           |
|--------------------------|-----|--------------------------------------------------------------------------------------------------------------------------------------------------------------------------------------------------------------|-----------|
| Participants             | 13* | (a) Report numbers of individuals at each stage of study—eg numbers potentially eligible, examined for eligibility, confirmed eligible, included in the study, completing follow-up, and analysed            | 8         |
|                          |     | (b) Give reasons for non-participation at each stage                                                                                                                                                         | NA        |
|                          |     | (c) Consider use of a flow diagram                                                                                                                                                                           | NA        |
| Descriptive data         | 14* | (a) Give characteristics of study participants (eg demographic, clinical, social) and information on exposures and potential confounders                                                                     | 9         |
|                          |     | (b) Indicate number of participants with missing data for each variable of interest                                                                                                                          | Table 1,2 |
|                          |     | (c) Summarise follow-up time (eg, average and total amount)                                                                                                                                                  | 9         |
| Outcome data             | 15* | Report numbers of outcome events or summary measures over time                                                                                                                                               | Table 3   |
| Main results             | 16  | (a) Give unadjusted estimates and, if applicable, confounder-adjusted estimates and their precision (eg, 95% confidence interval). Make clear which confounders were adjusted for and why they were included | Table 2   |
|                          |     | (b) Report category boundaries when continuous variables were categorized                                                                                                                                    | Table 1,2 |
|                          |     | (c) If relevant, consider translating estimates of relative risk into absolute risk for a meaningful time period                                                                                             | NA        |
| Other analyses           | 17  | Report other analyses done—eg analyses of subgroups and interactions, and sensitivity analyses                                                                                                               | NA        |
| <b>Discussion</b>        |     |                                                                                                                                                                                                              |           |
| Key results              | 18  | Summarise key results with reference to study objectives                                                                                                                                                     | 12        |
| <b>Limitations</b>       |     |                                                                                                                                                                                                              |           |
| Interpretation           | 20  | Give a cautious overall interpretation of results considering objectives, limitations, multiplicity of analyses, results from similar studies, and other relevant evidence                                   | 14-15     |
| Generalisability         | 21  | Discuss the generalisability (external validity) of the study results                                                                                                                                        | 15-16     |
| <b>Other information</b> |     |                                                                                                                                                                                                              |           |
| Funding                  | 22  | Give the source of funding and the role of the funders for the present study and, if applicable, for the original study on which the present article is based                                                | 17        |

\*Give information separately for cases and controls in case-control studies and, if applicable, for exposed and unexposed groups in cohort and cross-sectional studies.

**Note:** An Explanation and Elaboration article discusses each checklist item and gives methodological background and published examples of transparent reporting. The STROBE checklist is best used in conjunction with this article (freely available on the Web sites of PLoS Medicine at <http://www.plosmedicine.org/>, Annals of Internal Medicine at <http://www.annals.org/>, and Epidemiology at <http://www.epidem.com/>). Information on the STROBE Initiative is available at [www.strobe-statement.org](http://www.strobe-statement.org).
