# Supplementary material for: Combining CD4 recovery and CD4: CD8 ratio restoration as an indicator for evaluating the outcome of continued antiretroviral therapy: an observational cohort study
Source: PubMed Central journal article supplement — BMJ Open. 2017 Sep 15;7(9):e016886. doi: 10.1136/bmjopen-2017-016886 (PMC5640103; doi:10.1136/bmjopen-2017-016886), 2017-09-15

(a) pre-HAART CD4 (cells/ $\mu$ L) vs year 4 CD4 (cells/ $\mu$ L)

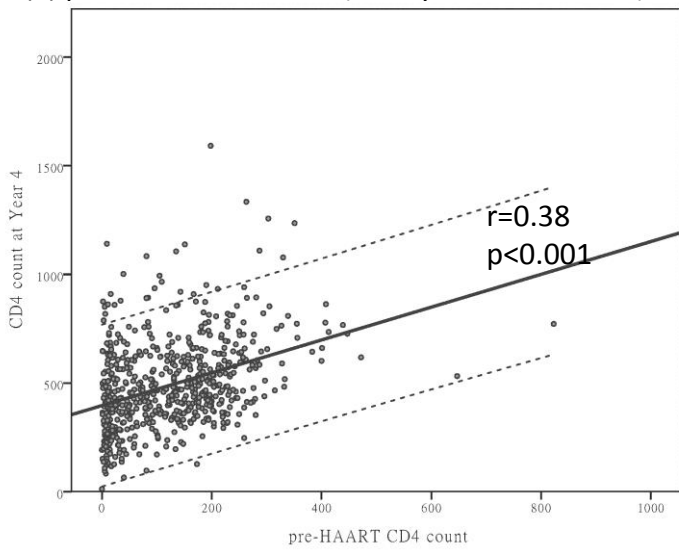

(b) pre-HAART CD8 (cells/ $\mu$ L) vs year 4 CD4 (cells/ $\mu$ L)

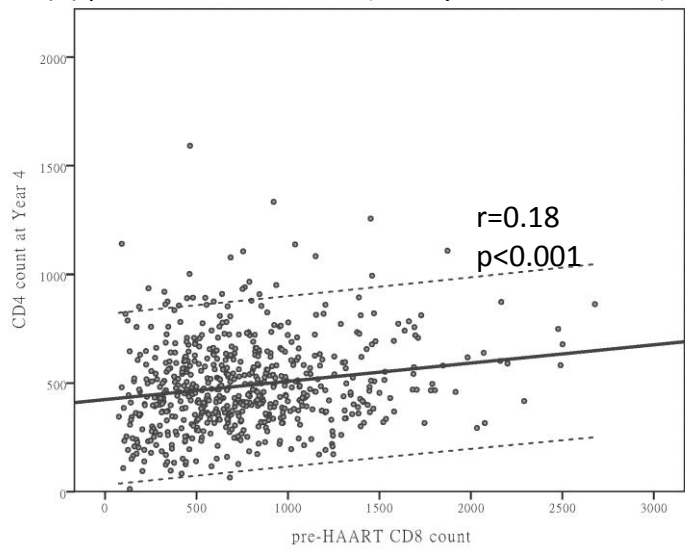

(c) pre-HAART CD8 (cells/ $\mu$ L) vs year 4 CD8 (cells/ $\mu$ L)

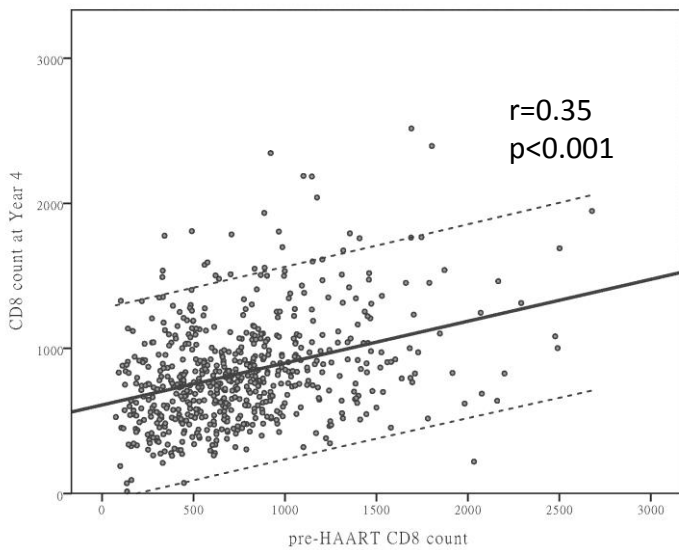

(d) pre-HAART CD8 (cells/ $\mu$ L) vs pre-HAART CD4 (cells/ $\mu$ L)

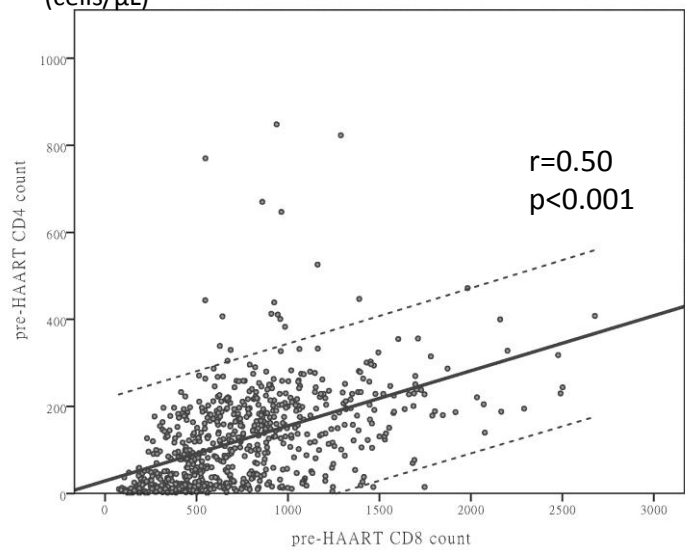

(e) pre-HAART CD4 (cells/ $\mu$ L) vs year 4 CD8 (cells/ $\mu$ L)

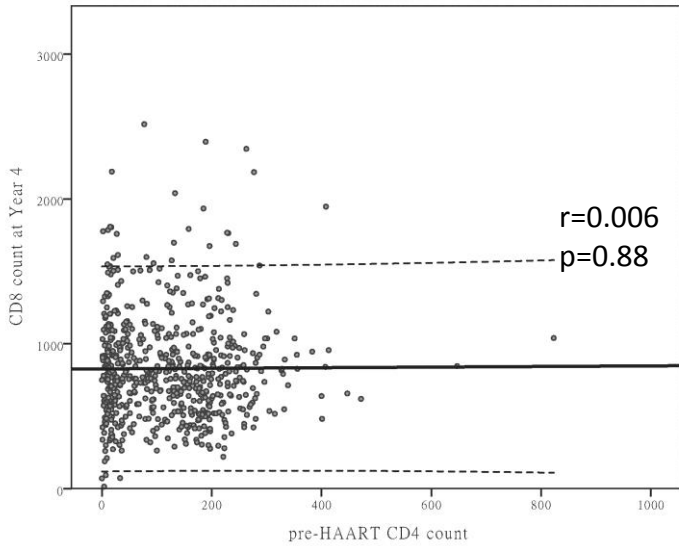

(f) year 4 CD8 (cells/ $\mu$ L) vs year 4 CD4 (cells/ $\mu$ L)

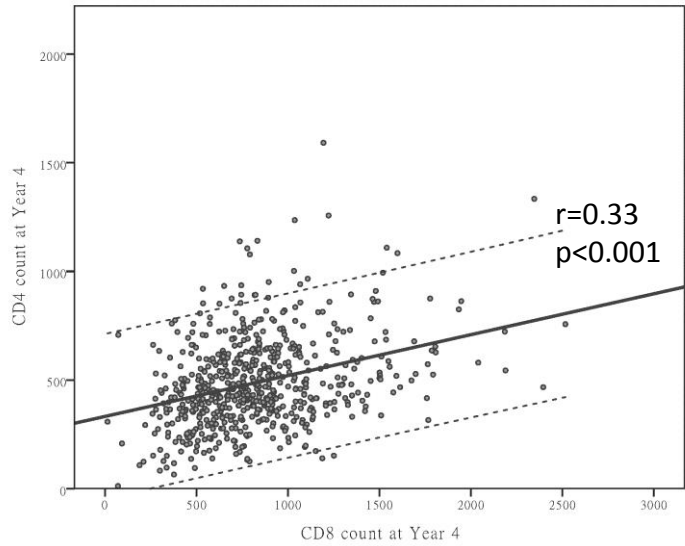

Supplement: bmjopen-2017-016886supp001.pdf [file bmjopen-2017-016886supp001.pdf]
