# Supplementary material for: Combining CD4 recovery and CD4: CD8 ratio restoration as an indicator for evaluating the outcome of continued antiretroviral therapy: an observational cohort study
Source: PubMed Central journal article supplement — BMJ Open. 2017 Sep 15;7(9):e016886. doi: 10.1136/bmjopen-2017-016886 (PMC5640103; doi:10.1136/bmjopen-2017-016886), 2017-09-15
Supplement: bmjopen-2017-016886supp002.pdf [file bmjopen-2017-016886supp002.pdf]

**Supplementary Table 1.** Relationship between CD4 count and corresponding CD4/CD8 ratio at (a) baseline before initiation of highly active antiretroviral therapy (pre-HAART) and (b) outcome at the end of Year 4 following HAART

(a) Baseline (pre-HAART)

|            |                 | CD4/CD8 ratio    |                |                 |                   |
|------------|-----------------|------------------|----------------|-----------------|-------------------|
|            |                 | <0.4             | 0.4-0.79       | >=0.8           | <u>Total</u>      |
| <b>CD4</b> | <b>&lt;50</b>   | 240 (34%)        | 0 (0%)         | 0 (0%)          | <u>240 (34%)</u>  |
|            | <b>50-199</b>   | 293 (42%)        | 23 (3%)        | 0 (0%)          | <u>316 (45%)</u>  |
|            | <b>200-499</b>  | 124 (18%)        | 17 (2%)        | 1 (0.1%)        | <u>142 (20%)</u>  |
|            | <b>&gt;=500</b> | 0 (0%)           | 4 (1%)         | 2 (0.3%)        | <u>6 (1%)</u>     |
|            | <b>Total</b>    | <u>657 (93%)</u> | <u>44 (6%)</u> | <u>3 (0.4%)</u> | <u>704 (100%)</u> |

(b) Outcome at the end of Year 4

|            |                 | CD4/CD8 ratio    |                  |                  |                   |
|------------|-----------------|------------------|------------------|------------------|-------------------|
|            |                 | <0.4             | 0.4-0.79         | >=0.8            | <u>Total</u>      |
| <b>CD4</b> | <b>&lt;50</b>   | 1 (0.2%)         | 0 (0%)           | 0 (0%)           | <u>1 (0.2%)</u>   |
|            | <b>50-199</b>   | 33 (5%)          | 6 (1%)           | 0 (0%)           | <u>39 (6%)</u>    |
|            | <b>200-499</b>  | 130 (21%)        | 193 (31%)        | 36 (6%)          | <u>359 (58%)</u>  |
|            | <b>&gt;=500</b> | 24 (4%)          | 134 (22%)        | 65 (10%)         | <u>223 (36%)</u>  |
|            | <b>Total</b>    | <u>188 (30%)</u> | <u>333 (54%)</u> | <u>101 (16%)</u> | <u>622 (100%)</u> |
