# Supplementary material for: Combining CD4 recovery and CD4: CD8 ratio restoration as an indicator for evaluating the outcome of continued antiretroviral therapy: an observational cohort study
Source: PubMed Central journal article supplement — BMJ Open. 2017 Sep 15;7(9):e016886. doi: 10.1136/bmjopen-2017-016886 (PMC5640103; doi:10.1136/bmjopen-2017-016886), 2017-09-15
Supplement: bmjopen-2017-016886supp003.pdf [file bmjopen-2017-016886supp003.pdf]

**Supplementary Table 2. Comparison of CD4 count, CD8 count and CD4/CD8 ratio between patients achieved optimal immune outcome and conventional outcome by Year 4 in generalized estimating equations**

| Model:                              | a. CD4 (cells/ $\mu$ L) |                   | b. CD8 (cells/ $\mu$ L) |                     | c. CD4/CD8 ratio |               |
|-------------------------------------|-------------------------|-------------------|-------------------------|---------------------|------------------|---------------|
|                                     | B                       | 95%C.I.           | B                       | 95%C.I.             | B                | 95%C.I.       |
| <b>(Intercept)</b>                  | 282.86                  | 273.99 to 291.74* | 1142.76                 | 1105.97 to 1179.55* | 0.24             | 0.22 to 0.25* |
| <b>Months from HAART initiation</b> |                         |                   |                         |                     |                  |               |
| >96 months                          | 421.75                  | 400.9 to 442.59*  | -54.91                  | -95.36 to -14.47*   | 0.49             | 0.46 to 0.52* |
| 84-96                               | 388.40                  | 366.41 to 410.39* | -18.28                  | -61.83 to 25.27     | 0.44             | 0.41 to 0.47* |
| 72-84                               | 375.13                  | 358.62 to 391.64* | -18.79                  | -58.14 to 20.57     | 0.41             | 0.39 to 0.43* |
| 60-72                               | 328.63                  | 314.74 to 342.52* | -50.54                  | -85.11 to -15.98*   | 0.37             | 0.35 to 0.39* |
| 48-60                               | 297.14                  | 283.97 to 310.3*  | -19.01                  | -48.33 to 10.3      | 0.34             | 0.31 to 0.37* |
| 36-48                               | 267.56                  | 256.63 to 278.49* | -14.72                  | -42.71 to 13.28     | 0.28             | 0.26 to 0.3*  |
| 24-36                               | 207.20                  | 196.89 to 217.52* | 19.10                   | -7.03 to 45.24      | 0.20             | 0.19 to 0.22* |
| 12-24                               | 119.10                  | 111.79 to 126.42* | 61.80                   | 37.11 to 86.48*     | 0.10             | 0.08 to 0.12* |
| $\leq$ 12 months                    | 0 <sup>a</sup>          |                   | 0 <sup>a</sup>          |                     | 0 <sup>a</sup>   |               |
| <b>Achievement by year 4</b>        |                         |                   |                         |                     |                  |               |
| optimal                             | 97.55                   | 80.71 to 114.39*  | -401.33                 | -437.93 to          | 0.41             | 0.37 to 0.45* |
| immune                              |                         |                   |                         | -364.74*            |                  |               |

outcome

conventional 0<sup>a</sup> 0<sup>a</sup> 0<sup>a</sup>

outcome

**(Scale)** 31443 151917 0.06

---

\*p<0.05

optimal immune outcome – achievement of CD4≥500/μL and CD4/CD8 ratio ≥0.8 by Year 4;

conventional outcome – achievement of only CD4≥500/μL by Year 4;
